## Evolution of limb development in cephalopod mollusks

Oscar A. Tarazona<sup>1,2,\*</sup>, Davys H. Lopez<sup>1</sup>, Leslie A. Slota<sup>2</sup>, and Martin J. Cohn<sup>1,2,#</sup>

<sup>1</sup>Department of Molecular Genetics and Microbiology, <sup>2</sup>Department of Biology, UF Genetics Institute, University of Florida, Gainesville, FL 32610 USA.

#Corresponding author: [mjcohn@ufl.edu](mailto:mjcohn@ufl.edu)

Current addresses: O.A.T.: Department of Genetics, Harvard Medical School, Boston, MA 02115; D.H.L.: Department of Genetics and Development, Columbia University, 3227 Broadway, Quad 9A, MC9891 New York, NY; L.A.S.: Department of Cell Biology, Duke University Medical Center, Box 3709, Durham, NC 27710

1       **Abstract**

2           Cephalopod mollusks evolved numerous anatomical novelties, including arms and  
3 tentacles, but little is known about the developmental mechanisms underlying  
4 cephalopod limb evolution. Here we show that all three axes of cuttlefish limbs are  
5 patterned by the same signaling networks that act in vertebrates and arthropods,  
6 although they evolved limbs independently. In cuttlefish limb buds, *Hedgehog* is  
7 expressed anteriorly. Posterior transplantation of *Hedgehog*-expressing cells induced  
8 mirror-image limb duplications. Bmp and Wnt signals, which establish dorsoventral  
9 polarity in vertebrate and arthropod limbs, are similarly polarized in cuttlefish. Inhibition  
10 of Bmp2/4 dorsally caused ectopic expression of *Notum*, which marks the ventral sucker  
11 field, and ectopic sucker development. Cuttlefish also show proximodistal  
12 regionalization of *Hth*, *Exd*, *Dll*, *Dac*, *Sp8/9*, and *Wnt* expression, which delineates arm  
13 and tentacle sucker fields. These results suggest that cephalopod limbs evolved by  
14 parallel activation of a genetic program for appendage development that was present in  
15 the bilaterian common ancestor.

16

17        **Introduction**

18

19        Animal appendages have widely varying morphologies and perform a multitude of  
20        functions, including locomotion, feeding, and reproduction (Nielsen, 2012; Ruppert et  
21        al., 2004). Limbs evolved on multiple occasions, and the absence of shared ontogenetic  
22        or morphological precursors of appendages in many animal lineages is consistent with  
23        their independent origins (Minelli, 2003; Pueyo and Couso, 2005; Shubin et al., 1997).  
24        This has led to the view that appendages in different clades of Bilateria are non-  
25        homologous morphological innovations that arose by convergent evolution (Nielsen,  
26        2012; Ruppert et al., 2004). However, despite more than 500 million years of  
27        divergence, the independently evolved limbs of arthropods and vertebrates share  
28        developmental genetic similarities (Pueyo and Couso, 2005; Shubin et al., 1997; Tabin  
29        et al., 1999).

30

31        These discoveries led to debate over whether the genetic program for appendage  
32        development evolved in the common ancestor of all bilaterians in the early Cambrian, or  
33        whether arthropod and vertebrate appendages have undergone rampant convergence  
34        of developmental programs (Minelli, 2000, 2003; Panganiban et al., 1997; Pueyo and  
35        Couso, 2005; Shubin et al., 1997; Tabin et al., 1999). A major obstacle to resolving this  
36        question is that the evidence of a conserved program derives almost exclusively from  
37        Ecdysozoa and Deuterostomia (Pueyo and Couso, 2005; Shubin et al., 1997), and little  
38        is known about molecular mechanisms of limb development in Spiralia, the third major

39 superphylum of Bilateria (Grimmel et al., 2016; Prpic, 2008; Winchell and Jacobs, 2013;  
40 Winchell et al., 2010).

41  
42 Within spiralian, the phylum Mollusca is the largest lineage, displaying a rich diversity  
43 of body plans (*Figure 1A*) dating back to the Cambrian explosion (Ruppert et al., 2004;  
44 Smith et al., 2011). The evolution of arms and tentacles in cephalopod mollusks  
45 contributed to the successful adaptive radiation of these agile marine predators (Kroger  
46 et al., 2011; Ruppert et al., 2004). Cephalopod limbs are highly muscular appendages  
47 that bear cup-shaped suckers on their ventral sides. Arms are short and have suckers  
48 along the entire ventral surface (*Figure 1B and C*), whereas tentacles are longer,  
49 retractable appendages with suckers restricted to a distal pad (*Figure 1D and E*).  
50 Tentacles are thought to be specialized serial homologs of the arms (Arnold, 1965;  
51 Lemaire, 1970; Shigeno et al., 2008) and are present in decapods (squid and cuttlefish)  
52 but absent in nautilids and octopods. Limbs likely evolved *de novo* in cephalopods  
53 (*Figure 1A*), since no homologous precursor structures have been identified in any other  
54 mollusk lineages (Lee et al., 2003; Shigeno et al., 2008). To test the hypothesis that  
55 cephalopod limbs evolved by recruitment of an ancient gene regulatory network for  
56 appendage development that is conserved across Bilateria, we investigated arm and  
57 tentacle development in embryos of the cuttlefish, *Sepia officinalis*.

58

59



60        **Results**

61

62        **Development of arms and tentacles in the cuttlefish (*Sepia officinalis*)**

63        Cuttlefishes are decapod cephalopods that have eight arms and two tentacles (*Figure*  
64        *1B-E; Figure 1- supplementary movies 1 and 2*). Fertilized cuttlefish eggs undergo  
65        superficial cleavage, and scanning electron microscopy and optical projection  
66        tomography show that most embryonic development is restricted to the animal pole  
67        (*Figure 1H and I*). The first sign of limb formation is observed at stage 16, when all ten  
68        limb primordia (5 on each side) can be detected as small swellings around the periphery  
69        of a flat-shaped embryo, which lies at the top of the large yolk mass (*Figure 1H and M*).  
70        Analysis of the mitotic marker phospho-histone H3 (PHH3) at stage 15 revealed  
71        localized clusters of PHH3-positive cells in each of the early limb primordia (*Figure 1F*  
72        *and G*), indicating that initiation of limb outgrowth is caused by localized cell  
73        proliferation. Discrete limb buds are observed from stage 17 (*Figure 1I and N; Figure 1-*  
74        *supplementary movie 3*). As the embryo begins to rise-up on the animal pole around  
75        stage 19, the limb buds start to elongate along the proximodistal axis (*Figure 1J and O;*  
76        *Figure 1- supplementary movie 4*), and by stage 24, the differential length and  
77        morphology of arms relative to tentacles is apparent (*Figure 1L; Figure 1-*  
78        *supplementary movie 5*).

79

80        Analysis of sucker development showed that a sucker field primordium initially forms as  
81        a narrow proximodistal ridge along the ventral surface of each limb (evident by stage  
82        21; *Figure 1P*). At later stages, the sucker field ridge cleaves superficially, segregating

83 sucker buds from proximal to distal (*Figure 1Q*). As the arms elongate, the sucker buds  
84 are laid down on the entire ventral surface of each arm (*Figure 1L and R; Figure 1-*  
85 *figure supplement 1A and C-G*), forming four parallel rows across the anteroposterior  
86 axis (*Figure 1C; Figure 1- figure supplement 1A*). In the tentacles, the primordial sucker  
87 band is restricted to the distal tip, where sucker buds form in eight rows along the  
88 anteroposterior axis of the tentacle sucker pads (*Figure 1D; Figure 1- figure supplement*  
89 *1B*). The full complement of immature sucker bud rows is present on each limb at  
90 hatching, and differentiation of the suckers continues during post-hatch development  
91 (*Figure 1- figure supplement 1H and I*).

92

### 93 **Molecular analysis of cuttlefish limbs reveals conservation of proximodistal,** 94 **anteroposterior, and dorsoventral patterning networks**

95 To test the hypothesis that cuttlefish limb development is regulated by the same  
96 molecular mechanisms that pattern arthropod and vertebrate limbs, despite their  
97 independent evolutionary origins, we cloned and characterized cuttlefish orthologs of  
98 genes that pattern the three axes of vertebrate and arthropod limbs, and then analyzed  
99 their expression patterns during cuttlefish limb development (*Figure 2 and Figure 2-*  
100 *figure supplements 1-10*).

101

102 Partial sequences of cuttlefish cDNAs (*Sepia officinalis* and *Sepia bandensis*) were  
103 isolated by rt-PCR, and preliminary identities were determined by comparison with NCBI  
104 sequence databases, including the octopus genome. Molecular phylogenetic  
105 reconstructions were then made by maximum likelihood phylogenetic inference using

106 the best amino acid substitution model for each gene family (see Materials and Methods  
107 for details). Tree topologies with well-supported bootstrap values showed the position of  
108 each cuttlefish gene within the targeted gene families, which included *Wnt*, *Tcf/Lef*,  
109 *Frizzled (Fzd)*, *Dachsund (Dac/Dach)*, *Notum*, *Patched (Ptc/Ptch)*, *Hedgehog (Hh)*,  
110 *Bone morphogenetic protein (Bmp)*, *Specificity protein (Sp)*, and the ANTP and TALE  
111 homeobox gene families (trees are shown in *Figure 2-figure supplements 1-10* and are  
112 described below; gene accession ID numbers and the data set used in the phylogenetic  
113 analyses is provided in *Figure 2 - Supplementary file 1*).

114  
115 Within the Wnt family of cell signaling proteins, we isolated cuttlefish orthologs of *Wnt1*,  
116 *Wnt2*, *Wnt5*, and *Wnt7* (*Figure 2-figure supplement 1*). Phylogenetic analysis of  
117 cuttlefish transcription factors identified *Tcf3/4*, an ortholog of arthropod *Pangolin* and a  
118 pro-ortholog of vertebrate *Tcf3* and *Tcf4* (*Figure 2-figure supplement 2*), *Dac*, a pro-  
119 ortholog of vertebrate *Dach1* and *Dach2* (*Figure 2-figure supplement 3*), and *Sp8/9*, a  
120 pro-ortholog of vertebrate *Sp8* and *Sp9* (*Figure 2-figure supplement 4*). We also  
121 identified numerous homeobox genes, which phylogenetic analyses confirmed to be *Dll*,  
122 a pro-ortholog of vertebrate *Dlx* genes, *Exd*, a pro-ortholog of vertebrate *Pbx* genes,  
123 *Hth*, a pro-ortholog of vertebrate *Meis1* and *Meis2*, and *Engrailed*, a pro-ortholog of  
124 vertebrate *En1* and *En2* (*Figure 2-figure supplement 5*).

125  
126 In addition, we cloned the Wnt extracellular inhibitors *Notum* and *Sfrp-1/2/5*, and the  
127 Wnt co-receptor *Fzd9/10* (*Figure 2-figure supplements 6 and 7*). Cuttlefish possess a  
128 *Bmp-2/4* gene that is an ortholog of arthropod *Dpp* and a pro-ortholog of vertebrate

129 *Bmp2* and *Bmp4* (Figure 2-figure supplement 8), a *Hh* gene (Grimaldi et al., 2008) that  
130 we show to be a pro-ortholog of the vertebrate hedgehog family (Figure 2-figure  
131 supplement 9), and a gene encoding the Hh receptor *Patched*, a pro-ortholog of  
132 vertebrate *Ptch1* and *Ptch2* (Figure 2-figure supplement 10). The cuttlefish *Sfrp* ortholog  
133 that we identified as *Sfrp1/2/5* was annotated incorrectly in the octopus genome as  
134 *Frizzled1* (Figure 2-Supplementary file 1). We also found two *Sp8/9* genes in the  
135 octopus genome (Figure 2-Supplementary file 1), and the cuttlefish *Sp8/9* gene shows  
136 clear orthology to only one of the two octopus genes (Figure 2-figure supplement 4),  
137 suggesting that the *Sp8/9* gene underwent a duplication in cephalopod mollusks.  
138 Therefore, we designate the octopus *Sp8/9* paralogs as *Sp8/9a* and *Sp8/9b*, and the  
139 cuttlefish *Sp8/9* gene that we isolated is the ortholog of *Sp8/9a*.

140  
141 We next investigated the spatial and temporal expression patterns of these genes  
142 during cuttlefish limb development. Genes that pattern the proximodistal axis of  
143 arthropod and vertebrate limbs (Lecuit and Cohen, 1997; Mercader et al., 1999;  
144 Panganiban et al., 1997; Pueyo and Couso, 2005) showed similarly polarized patterns  
145 of expression along the proximodistal axis of cuttlefish limb buds, with *Exd* and *Hth*  
146 restricted proximally (Figure 2B, F and G; Figure 3A-E; Figure 3-figure supplement 1A  
147 and B; and Figure 3-figure supplement 2A, I and J) and *Dll*, *Dac*, *Sp8/9a*, *Wnt1*, *Wnt5*,  
148 and *Wnt7* restricted distally (Figure 2C, H-J; Figure 3F-I; Figure 3-figure supplement 1C-  
149 E and L-N; and Figure 3-figure supplement 2B, C, G, I, and J). At stages 20-21, the  
150 distal expression boundaries of *Exd* and *Hth* and the proximal expression boundaries of  
151 *Dll* and *Sp8/9a* appear to mark the morphological boundary between the proximal

152 sucker-free and the distal sucker-forming regions (compare right panels in *Figure 2F-H*  
153 *and J* with *Figure 1P*). Indeed, at stages when arms and tentacles begin to develop their  
154 distinctive morphologies -- tentacles are longer and have an extensive proximal sucker-  
155 free domain -- the *Exd/Hth* expression domains were found to extend further distally in  
156 tentacles (*Figure 3B,D*) compared to arms (*Figure 3A* and *C*). This distal expansion of  
157 the *Exd/Hth* expression domain matches the expanded sucker-free region and the distal  
158 restriction of suckers in tentacles (*Figure 3E*).

159  
160 Our finding that the proximodistal axis of cuttlefish limbs shares patterns of molecular  
161 regionalization with arthropod and vertebrate limbs led us to examine whether  
162 anteroposterior and dorsoventral axis development are also conserved. Posteriorly  
163 polarized activation of Hedgehog signaling in arthropod and vertebrate limbs is essential  
164 for proper patterning of the anteroposterior axis, and ectopic activation of the Hedgehog  
165 pathway induces anterior duplication of posterior structures (Basler and Struhl, 1994;  
166 Kojima et al., 1994; Riddle et al., 1993). We analyzed *Hh* expression during cuttlefish  
167 limb development at stages 16 to 20 and found that *Hh* expression is also polarized to  
168 one side of cuttlefish limb buds. In cuttlefishes, however, *Hh* expression is restricted to  
169 the anterior margin of the limb bud, whereas in arthropods and vertebrates, *Hh/Shh* is  
170 expressed posteriorly (*Figure 2D* and *K*; and *Figure 3-figure supplement 2D*).

171 Consistent with the anterior localization of *Hh*, we detected expression of *Patched*,  
172 which serves as a readout of Hedgehog signal transduction, in an anterior-to-posterior  
173 gradient (*Figure 2L*). Thus, anteroposteriorly restricted activation of the Hedgehog  
174 pathway is a conserved feature of cephalopod, arthropod, and vertebrate limb

175 development, but the polarity of the signaling center is reversed in cephalopod limbs. By  
176 stage 21, the anteriorly restricted *Hh* domain has diminished and a new, central  
177 expression domain appears in the location of the brachial nerve primordia (*Figure 3-*  
178 *figure supplement 1F,K*).

179  
180 We then examined the dorsoventral axis, which is controlled by the antagonistic actions  
181 of *wg/Wnt* and *dpp/Bmp* signaling in arthropods and vertebrates (Brook and Cohen,  
182 1996; Cygan et al., 1997; Diaz-Benjumea et al., 1994; Jiang and Struhl, 1996; Parr and  
183 McMahon, 1995). In arthropods, the Wnt ligand *wg* is expressed ventrally, whereas the  
184 *Bmp2/4* ortholog *dpp* is expressed dorsally (Basler and Struhl, 1994; Diaz-Benjumea et  
185 al., 1994). Expression and function of the Wnt-Bmp network is conserved, albeit with  
186 inverted polarity, in vertebrate limbs; *Wnt7a* is expressed dorsally (Parr and McMahon,  
187 1995) and Bmp signaling activates *Engrailed1* (*En1*) ventrally (Ahn et al., 2001), and  
188 these interactions regulate development of dorsal and ventral limb structures (Cygan et  
189 al., 1997; Parr and McMahon, 1995). During cuttlefish limb development, *Bmp2/4* and  
190 *En* show dorsally polarized expression (*Fig 2E, M, and N*; and *Figure 3-figure*  
191 *supplement 2E*). Genes encoding Wnt ligands (*Wnt1*, *Wnt5* and *Wnt7*) and cellular  
192 components of canonical Wnt signaling cascade (*Tcf3/4* and *Frz9/10*) are expressed  
193 broadly throughout the dorsoventral axis of cuttlefish limb buds (*Figure 3F-I* and *Figure*  
194 *3-figure supplement 1L-R*; and *Figure 3-figure supplement 2G, I, and J*); however, the  
195 secreted Wnt antagonists *Notum* and *Sfrp1/2/5* are expressed dorsally in the limb and  
196 interlimb regions (*Figure 3J-M*), with the *Sfrp1/2/5* domain extending deeper into the  
197 dorsal limb buds (*Figure 2O*; *Figure 3M*). This dorsal expression of Wnt antagonists

198 suggests a mechanism for restriction of Wnt signaling to the ventral side of the  
199 cephalopod limb buds. Taken together, these results suggest that the genetic pathways  
200 active along the proximodistal, anteroposterior, and dorsoventral axes of cephalopod  
201 limbs are homologous (specifically, orthologous) to the networks that regulate limb  
202 development in arthropods and vertebrates.

203  
204 In order to further test this hypothesis, we next performed a series of functional  
205 experiments to determine whether polarized expression of these signaling molecules is  
206 involved in patterning the anteroposterior and dorsoventral axes of cuttlefish limbs  
207 (described below). We developed a method for *ex-ovo* culture of cuttlefish embryos (see  
208 Material and Methods) to allow *in vivo* manipulations of genetic pathways in early limb  
209 buds.

210  
211 **Bmp signaling controls dorsoventral patterning of cuttlefish limbs**  
212 A hallmark of dorsoventral polarity is the restriction of sucker buds to the ventral surface  
213 of the limb (*Figure 1C, D and S*), and this is preceded by ventral expression of *Notum* in  
214 the sucker-forming region at stage 21 (*Figure 3N-Q*). We asked whether polarized  
215 expression of *Bmp2/4* on the dorsal side of cuttlefish limb buds is required for the  
216 specification of dorsal identity. To repress dorsal Bmp activity, we implanted carrier  
217 beads loaded with Noggin (Nog), a secreted Bmp inhibitor protein, on the dorsal side of  
218 stage 17 limb buds (*Figure 4A*). Implantation of Nog beads on the dorsal side of  
219 cuttlefish limb buds resulted in ectopic, dorsal expansion of the *Notum* mRNA domain  
220 (n=3/3; control PBS [phosphate buffered saline] beads had no effect on *Notum*

221 expression [n=3/3]) (*Figure 4G,H*). To determine whether inhibition of dorsal Bmp  
222 signaling respecifies dorsal cells to form ventral structures, we repeated the experiment  
223 and allowed embryos to develop to stage 26-27. Analysis of limb morphology by  
224 scanning electron microscopy revealed the presence of ectopic sucker buds on the  
225 dorsal surface of Nog-treated limbs (n=8/12; *Figure 4B; Figure 4 - figure supplement 1A*  
226 *and B*). The ectopic dorsal suckers extended around the distal tip of the limb and joined  
227 the ventral sucker field. By contrast, in limbs that received control PBS beads dorsally,  
228 sucker buds were restricted to ventral surface and terminated at the normal dorsal-  
229 ventral boundary at the tip of the limb (n=15/15; *Figure 4C*). Our finding that antagonism  
230 of Bmp signaling results in development of ventral structures (sucker buds) on the  
231 dorsal side of the limb indicates that dorsal *Bmp2/4* activity is required for the early  
232 specification of dorsal identity in cephalopod limb development.

233

### 234 **Hedgehog signaling at the anterior margin of cuttlefish limb buds controls** 235 **anteroposterior patterning of the sucker field**

236 We then investigated whether the mechanism of anteroposterior patterning is conserved  
237 between cephalopod and vertebrate/arthropod limbs. To determine whether the anterior  
238 expression of *Hh* in cuttlefish limb buds controls anteroposterior patterning, we grafted  
239 *Hh*-expressing cells from the thickened funnel epithelium (Tarazona *et al.*, 2016) to the  
240 posterior side of stage 17 limb buds, which created an ectopic source of Hh opposite  
241 the endogenous *Hh* expression domain (*Figure 4D*). We used *Hh*-expressing cells from  
242 the funnel, rather than the anterior side of the limb bud, to exclude the possibility of  
243 grafted limb cells undergoing self-differentiation. Transplantation of *Hh*-expressing cells



244 to the posterior side of cuttlefish limb buds resulted in posterior limb duplications  
245 (n=7/12; *Figure 4E* and *Figure 4 - figure supplement 1C,D*). Analysis of morphology and  
246 gene expression in host limbs approximately 10 days after receiving the graft revealed  
247 that the posterior duplications even contained sucker buds, which were marked by  
248 *Notum* expression (*Figure 4I* and *J*). By contrast, limbs that received control grafts of  
249 stage 24 funnel epithelium that lacks *Hh* expression (Tarazona *et al.*, 2016) developed  
250 normally (n=8/8; *Figure 4F*).

251  
252 Although these results suggest that *Hh* is sufficient to re-specify anteroposterior polarity  
253 in cuttlefish limbs, we wanted to exclude the possibility that posterior identity was  
254 induced by other factors that could be present in the graft. Therefore, we tested whether  
255 Hh signaling is necessary for anteroposterior patterning of cephalopod limbs by  
256 specifically repressing endogenous Hh signaling. A notable morphological feature of  
257 cephalopod limbs is the anteroposterior arrangement of parallel sucker rows on the  
258 ventral surface (*Figure 1C, D* and *S*). Based on the results of the transplantation  
259 experiments, we reasoned that Hh signaling could regulate the number of sucker rows  
260 along the anteroposterior axis of cephalopod limbs, similar to the manner in which Hh  
261 specifies digit number along the anteroposterior axis of vertebrate limbs (Lewis *et al.*,  
262 2001; Scherz *et al.*, 2007; Zhu *et al.*, 2008).

263  
264 Transitory treatment (2 days) of cuttlefish embryos at stage 16, when *Hh* is first  
265 expressed on the anterior side of the early limb bud, with the small molecule  
266 cyclopamine, an inhibitor of Smoothed that represses Hh signaling (*Figure 4K*),

267 disrupted the anteroposterior distribution of sucker rows in arms and tentacles. Severity  
268 of this phenotype ranged from arms with a reduced number of suckers and sucker rows  
269 (n=10/10; *Figure 4N and O*) to completely sucker-free tentacles (n=8/10; *Figs. 4L*).  
270 Control treatments with vehicle only (DMSO) did not alter the normal anteroposterior  
271 pattern of sucker rows (n=8/8; *Figure 4M and P*). Finally, to confirm that the phenotype  
272 of cyclopamine-treated embryos was not due to failure in brachial nerve differentiation,  
273 we examined acetylated tubulin immunofluorescence, which shows that the brachial  
274 nerve cords develop in both cyclopamine and DMSO treated embryos (*Figure 4 - figure*  
275 *supplement 1E,F*). These results show that Hh signaling is necessary for proper  
276 patterning of the anteroposterior axis in cephalopod limb development.

277

## 278 **Discussion**

279 Our finding that the proximodistal, dorsoventral, and anteroposterior axes of cuttlefish  
280 limb buds are patterned by the same pathways that regulate arthropod and vertebrate  
281 limb development suggests that the independent evolution of limbs in cephalopod  
282 mollusks involved recruitment of an ancient genetic program for appendage  
283 development. Discovery of this appendage developmental circuit within Spiralia  
284 demonstrates its deep conservation across all three branches of Bilateria (i.e.,  
285 Deuterostomia, Ecdysozoa and Spiralia), suggesting its presence in the common  
286 ancestor of all bilaterians (*Figure 5*). Parallel recruitment of this ancient developmental  
287 genetic program may have played a role in the independent evolution of a wide diversity  
288 of appendages in many bilaterian lineages (Moczek and Nagy, 2005; Shubin et al.,  
289 2009).

290  
291 The discovery that cephalopod, arthropod, and vertebrate appendages develop using  
292 conserved developmental mechanisms does not exclude the possibility that other types  
293 of appendages evolved by recruiting a different set of developmental tools (or by  
294 utilizing the same tools but in different patterns). Examination of gene expression in  
295 lateral parapodial appendages of the polychaete worm *Neanthes*, also a spiralian, led to  
296 the suggestion that the molecular mechanisms of polychaete appendage development  
297 might not be conserved with ecdysozoans and deuterostomes (Winchell and Jacobs,  
298 2013; Winchell et al., 2010). However, given that relatively few genes were examined in  
299 *Neanthes* parapodia, it is difficult to conclude whether the reported differences between  
300 parapodia and arthropod/vertebrate/cephalopod limbs reflect the unique nature of  
301 parapodia or lineage-specific divergences that occurred after recruitment of the core  
302 developmental program. A study of a different polychaete, *Platynereis dumerilii*, showed  
303 that gene expression is generally conserved in appendages that form during  
304 regeneration of caudal trunk segments, although some divergent patterns were  
305 observed and these were suggested to reflect taxon-specific differences in appendage  
306 morphology (Grimmel et al., 2016). How parapodia fit into the picture of animal  
307 appendage evolution will require additional studies of spiralian appendages to increase  
308 the diversity of species, types of appendages, and number of genes/pathways  
309 interrogated. Nonetheless, our discovery that cephalopod arms and tentacles evolved  
310 by parallel recruitment of the same genetic program that orchestrates appendage  
311 formation in arthropods and vertebrates suggests that this program was present in the  
312 bilaterian common ancestor.

313  
314 Activation of this ancient developmental program could also underlie the origin of other  
315 morphological innovations, including non-locomotory appendages such as beetle horns  
316 (Moczek and Nagy, 2005; Moczek et al., 2006) and external genital organs of amniote  
317 vertebrates (Cohn, 2011; Gredler et al., 2014). We propose that the genetic program for  
318 appendage formation was stabilized in Bilateria, including those lineages that lack  
319 limbs, for development of appendage-like structures. This hypothesis implies that the  
320 ancestral appendage developmental program was not a latent developmental feature  
321 that was redeployed each time that limbs evolved, but rather it might have been a  
322 continuously activated network that controlled formation of outgrowths in general.

323  
324 One of our observations raises the possibility that the gene network that controls  
325 appendage formation could be conserved in non-cephalopod mollusks, despite the  
326 absence of arms and tentacles in those lineages. During cuttlefish funnel/siphon  
327 development, we found asymmetric expression of *Hh* (Tarazona *et al.*, 2016) and  
328 proximodistally polarized expression of *Wnt5* and *Exd*, which partially mirror their  
329 expression patterns during arm and tentacle development (Figure 5-figure supplement  
330 1). If this gene network is found to be active in the developing funnel/siphon of non-  
331 cephalopod mollusks, then the funnel/siphon would represent a more primitive site of  
332 expression in mollusks, given that evolution of the molluscan funnel/siphon predates the  
333 origin of cephalopod limbs (Nielsen, 2012; Ruppert et al., 2004). Further studies of gene  
334 expression and function during funnel/siphon development in mollusks will be needed to

335 determine if this clade shows conservation of the appendage development program  
336 beyond cephalopod arm and tentacle development.

337  
338 Although the bilaterian common ancestor may have used this genetic program to control  
339 development of rudimentary outgrowths (e.g., appendages, funnel/siphon, genitalia), it  
340 is also possible that it predates the evolution of locomotory and non- locomotory  
341 appendages. Studies of cephalic neuroectoderm showed that gene expression patterns  
342 controlling the anteroposterior axis of the neuroectoderm mirror the organization of gene  
343 expression territories along the proximodistal axis of locomotory appendages, including  
344 polarized expression of *Sp8*, *Dll*, *Dac* and *Hth* (Lemons et al., 2010). Similarly, Minelli  
345 has suggested that the appendage patterning program could reflect co-option of a more  
346 ancient (pre-bilaterian) program for patterning the main body axis and, therefore,  
347 bilaterian appendages are simply secondary body axes (Minelli, 2000, 2003).

348  
349 Cephalopod arms and tentacles have no direct structural homologs in non-cephalopod  
350 mollusks; however, they likely formed from the ventral embryonic foot, a morphological  
351 and embryological hallmark of the molluscan bodyplan (Nödl et al., 2016). Therefore,  
352 cephalopod arms and tentacles may be considered evolutionary novelties that are  
353 derived from a structure that is conserved across Mollusca. This raises the question of  
354 whether other foot-derived outgrowths/appendages (e.g., in sea slugs) evolved by co-  
355 option of the same developmental program that cephalopods, arthropods, and  
356 vertebrates use to build appendages.

357

358 Although the results presented here suggest that an ancient and conserved  
359 developmental genetic program facilitated the origin of cephalopod limbs, they also  
360 indicate that fine-scale regulatory changes may have played a role in the diversification  
361 of cephalopod limb morphologies. For example, evolution of specialized tentacles from  
362 serially homologous arms may have resulted from a distal shift in the expression of  
363 proximal identity genes, such as *Exd* and *Hth*, which could have extended the proximal  
364 sucker-free domain and restricted suckers to a distal pad (see *Figure 3A-E*). Likewise,  
365 the results of functional manipulations of Hh signaling in cuttlefish limbs suggests that  
366 the diversity in the number of sucker rows in cephalopod limbs (i.e. four rows in squids  
367 and cuttlefishes, two in octopus, and one in vampire squid and glass octopus) could be  
368 explained by modulation of Hh signaling, in the same way that gradual changes to *Shh*  
369 regulation has led to variation in digit number in tetrapod vertebrates (Scherz et al.,  
370 2007; Shapiro et al., 2003; Zhu et al., 2008).

371  
372 Finally, we note that while the data presented here point to the existence of a deeply  
373 conserved genetic program for appendage development across *Bilateria*, this does not  
374 imply that the limbs of cephalopods, arthropods, and vertebrates are homologous  
375 structures, or that limbs were present in the common ancestor. Rather, these results  
376 show that homologous developmental mechanisms underlie the multiple parallel origins  
377 of limbs in bilaterians.

378

## 379 **Materials and Methods**

380  
381 No statistical methods were used to predetermine sample size. Embryos were  
382 randomized in each experiment. The investigators were not blinded to allocation during  
383 experiments and outcome assessment.

### 384 385 **Embryo collection and preparation**

386 *Sepia officinalis* and *Sepia bandensis* eggs were purchased from commercial suppliers,  
387 incubated until they reached the required stages (Lemaire, 1970), and prepared for *in*  
388 *situ* hybridization (ISH) and immunohistochemistry as described (Tarazona et al., 2016).

### 389 390 **Optical projection tomography (OPT)**

391 Three-dimensional reconstructions of gene expression in cuttlefish embryos were  
392 performed as previously described (Tarazona et al., 2016).

### 393 394 **Scanning electron microscopy**

395 Cuttlefish embryos were fixed in 4% paraformaldehyde in phosphate buffered saline  
396 (PBS) overnight at 4°C and were washed with PBS the next day. Embryos were fixed in  
397 1% osmium tetroxide solution in PBS for 30 minutes and then washed three times in  
398 PBS, dehydrated through a graded ethanol series, critical point dried, and sputter  
399 coated with gold. Embryonic samples were scanned using a Hitachi SU5000 and  
400 Hitachi TM3000.

### 401 402 **Gene cloning and molecular phylogenetic analysis**

403 RNA extraction from *Sepia officinalis* and *Sepia bandensis* embryos at stages 15–26  
404 was performed using TRIzol reagent (Ambion) following the manufacturer's instructions.  
405 cDNA synthesis was performed by an AMV reverse transcriptase (New England  
406 Biolabs) following the manufacturer's instructions. PCR amplification was carried out on  
407 *Sepia* cDNA pools, amplicons were cloned into TA vectors and sequenced. We then  
408 performed multiple sequence alignments (MSA) with ClustalW (PMID: 7984417) using  
409 the predicted amino acid sequence of our cuttlefish cDNA fragments, and putative

410 metazoan orthologous genes downloaded from NCBI RefSeq protein databases (Figure  
411 1-Supplementary file 1). We performed nine MSA for Wnt, Tcf, Sfrp, Notum, Patch, Hh,  
412 Bmp, Sp and Homeodomain families. Each of the nine MSA was analyzed by ProtTest  
413 (PMID: 15647292), in order to determine the best combination of amino acid  
414 substitution model and other free parameters (amino acid site frequency, site  
415 heterogeneity and invariant sites), using Akaike information criterion (Figure 1-  
416 Supplementary file 1). We applied the best model in RaXML (PMID: 18853362) for each  
417 MSA and performed maximum likelihood phylogenetic inference, estimating branch  
418 support by bootstrap, and then majority consensus of the trees from all bootstrap  
419 partitions was performed to compute the final tree topology. All sequences have been  
420 deposited in Genbank under accession numbers MK756067-MK756082 (complete list  
421 of entries is provided in Supplementary File 1)

422

### 423 ***In situ* hybridization (ISH) and immunohistochemistry**

424 Whole-mount ISH was performed using digoxigenin- and fluorescein-labeled antisense  
425 (or sense control) RNA probes according to protocols described previously (Tarazona et  
426 al., 2016). Due to limited availability of embryonic material at relevant early  
427 developmental stages, only a limited number of *S. bandensis* embryos were used for  
428 ISH. Thus, the majority of ISH were performed in *S. officinalis* embryos using *S.*  
429 *officinalis* antisense RNA probe, however, some ISH were performed in *S. officinalis*  
430 embryos using *S. bandensis* antisense RNA probes. We validated the specificity of *S.*  
431 *bandensis* probes in *S. officinalis* embryos by comparing the gene expression domains  
432 marked by these probes in embryonic material from both species at stages 20 and 21.  
433 This comparison shows that gene expression territories identified by these probes at  
434 these stages were indistinguishable between the two species (*Figure 3-figure*  
435 *supplement 2*), consistent with their high level of sequence similarity (Figure 3-  
436 supplementary file 1). Excluding the *S. bandensis* ISH mentioned above, all the  
437 experiments described in this work were carried out with *S. officinalis* embryos.  
438 Proliferating cells were detected by immunolocalization of Histone H3 Serine 10  
439 phosphorylation using an antibody against H3S10p/PHH3 (06-570, EMD Millipore) and



440 brachial nerve tissue was detected using an antibody against acetylated alpha tubulin  
441 (ab24610, Abcam).

442

### 443 **Cuttlefish ex-ovo embryo culture and embryo manipulations**

444 A protocol for ex-ovo cuttlefish embryo culture was established for this study, as a  
445 modified version of previous descriptions of ex-ovo embryo culture in squid (Arnold,  
446 1990). Briefly, to minimize the problem of bacterial and fungal contamination we started  
447 the protocol by taking 10 cuttlefish eggs at the appropriate stage, placing them in a 50ml  
448 tube, and washing them with 0.22  $\mu\text{m}$  filtered artificial sea water (FASW) five times.  
449 Eggs were then cleaned with a freshly prepared 5% bleach solution (0.25% sodium  
450 hypochlorite in FASW) for 5 seconds and immediately washed with FASW five times.  
451 The bleaching and washing steps were repeated two to three times. Five additional  
452 washes with FASW were carried out before incubating the eggs in 2X  
453 antibiotic/antimycotic solution (A5955, Sigma) in FASW for 2 hours at ambient  
454 temperature.

455

456 Each cuttlefish egg was then transferred to a 50 mm diameter petri dish that was coated  
457 with a ~ 5mm layer of 0.5% low melting point agarose (16520050, ThermoFisher), and  
458 filled with culture medium (components described below). The agarose layer had a  
459 hemispherical depression in the center of the dish made with a sterile 10 mm acrylic  
460 necklace bead before gel solidification. The 10mm hemispherical depression is  
461 essential to maintain the normal shape of the yolk mass once the embryos are outside  
462 their egg case. Embryos were then extracted from their egg cases (*S. officinalis* are  
463 housed individually, one embryo per egg case) very slowly and with extreme care to  
464 avoid rupturing the yolk mass at the vegetal pole of the egg and were carefully placed in  
465 the hemispherical depression in the agarose. To extract the embryo, a single 5mm  
466 diameter hole was created in the egg case, which generates a burst of the vitelline liquid  
467 and part of the embryo out from the egg case. With the hole kept open, the  
468 spontaneous shrinkage of the egg case aided in the expelling of the large cuttlefish  
469 embryo. Of every ten eggs prepared this way, between two and five embryos were  
470 damaged and had to be discarded. Embryos were cultured at 17°C.

471  
472 **Protein carrier beads and tissue grafting**  
473 For protein carrier bead implantation, 150µm diameter Affi-Gel Blue Gel beads (153-  
474 7301, Biorad) were selected and transferred to 1mg/ml recombinant human Noggin  
475 protein (6057-NG, R&D Systems) in PBS and incubated for 30 minutes to 1 hour at  
476 ambient temperature before being implanted in embryos. Control beads were incubated  
477 in PBS only.

478  
479 Grafts of *Hh*-expressing tissue were performed using stage 24 donor embryos and  
480 carefully dissecting the funnel side of the mantle-funnel locking system, which carries  
481 the *Hh*-expressing thickened funnel epithelium (Tarazona et al., 2016). The dissected  
482 tissue was transferred to 10 mg/ml Dispase II (D4693, Sigma) in cuttlefish culture  
483 medium and incubated for 40 minutes or until the thickened epithelium was easily  
484 detaching from the underlying mesenchyme with the aid of forceps. Tissue was then  
485 transferred to cuttlefish culture medium without Dispase II, where they were washed  
486 and then grafted into limb buds of stage 17 host embryos. Control grafts were  
487 performed using the non-*Hh* expressing epithelium of the funnel.

488  
489 After bead implantation or tissue grafts, embryos were incubated at 17°C until control  
490 embryos reached stage 26, at which point all embryos were collected and prepared for  
491 SEM or ISH.

492  
493 **Cuttlefish culture medium**  
494 We used a modified version of a cell culture medium for squid neuron, glia and muscle  
495 cells that was previously described (Rice et al., 1990). Cuttlefish culture medium had no  
496 glucose, was buffered with 20mM HEPES and adjusted the pH to 7.6. The medium  
497 contained: 430 mM NaCl, 10 mM KCl, 10 mM CaCl<sub>2</sub>, 50 mM MgCl<sub>2</sub>, 1X MEM Non-  
498 Essential Amino Acids Solution (11140-076, Life Technologies), 1X MEM Amino Acids  
499 Solution (11130-051, Life Technologies), 1X MEM Vitamin Solution (11120-052, Life  
500 Technologies), 2 mM L-Glutamine (25030-081, Life Technologies). The medium was

501 supplemented with 20% heat inactivated fetal bovine serum (16000044, ThermoFisher)  
502 and 1X antibiotic/antimycotic solution (A5955, Sigma).

503

#### 504 **Treatments with small-molecule inhibitors**

505 Cyclopamine treatments were performed as described previously (Tarazona et al.,  
506 2016) with the following modifications; stage 16 embryos were treated with 10  $\mu$ M  
507 cyclopamine (C988400, Toronto Research Chemicals) for 2 days, then washed  
508 thoroughly ten times with FASW. Embryos were then washed 5 more times every hour  
509 and one time every day before collecting the embryos for SEM. Control embryos were  
510 treated with 0.1% DMSO and then washed as described above.

511

512

#### 513 **Acknowledgments**

514 We thank Emily Merton for technical support, Karen L. Kelley and Kimberly L. Backer-  
515 Kelley (UF ICBR) for assistance with electron microscopy, and members of our  
516 laboratory for helpful comments and discussions. O.A.T. was supported by a Howard  
517 Hughes Medical Institute International Student Research Fellowship, D.H.L. by a  
518 Society for Developmental Biology “Choose Development!” fellowship, and L.A.S. by an  
519 EDEN Undergraduate Internship.

520

#### 521 **Funding**

522 This project was supported by an award from the Howard Hughes Medical Institute (to  
523 M.J.C).

524

#### 525 **Competing Interests**

526 The authors declare no competing or financial interests.

527

528 **Author Contributions**

529 O.A.T. and M.J.C. designed the experiments, analyzed the data and wrote the paper.

530 All authors collaborated in reviewing and editing the paper. O.A.T., D.H.L. and L.A.S.

531 cloned the *Sepia* genes and analyzed gene and protein expression. O.A.T. performed

532 the molecular phylogenetic analyses, scanning electron microscopy, optical projection

533 tomography scanning, three-dimensional reconstructions, *ex-ovo* embryo culture, bead

534 implantation, tissue grafting, and small-molecule treatments.

535

536 **Supplementary Materials**

537 Figure 1 - figure supplement 1;

538 Figure 1 - Supplementary Movies 1 to 5

539

540 Figure 2 - figure supplements 1 to 10

541 Figure 2 - Supplementary file 1

542

543 Figure 3 - figure supplement 1

544 Figure 3 - figure supplement 2

545 Figure 3 - Supplementary file 1

546

547 Figure 4 - figure supplement 1

548

549 Figure 5 - figure supplement 1

550

## References

- 551  
552  
553 Ahn, K., Mishina, Y., Hanks, M.C., Behringer, R.R., Crenshaw, E.B., 3rd, 2001. BMPR-IA  
554 signaling is required for the formation of the apical ectodermal ridge and dorsal-ventral  
555 patterning of the limb. *Development* 128, 4449-4461.
- 556 Angelini, D.R., Kaufman, T.C., 2005. Insect appendages and comparative ontogenetics. *Dev*  
557 *Biol* 286, 57-77.
- 558 Arnold, J.M., 1965. Normal Embryonic Stages of the Squid, *Loligo pealii* (Lesueur). *Biological*  
559 *Bulletin* 128, 24-32.
- 560 Arnold, J.M., 1990. Embryonic Development of the Squid, in: Adelman, W.J., Arnold, J.M.,  
561 Gilbert, D.L. (Eds.), *Squid as Experimental Animals*. Springer US.
- 562 Basler, K., Struhl, G., 1994. Compartment boundaries and the control of *Drosophila* limb  
563 pattern by hedgehog protein. *Nature* 368, 208-214.
- 564 Beermann, A., Jay, D.G., Beeman, R.W., Hulskamp, M., Tautz, D., Jurgens, G., 2001. The  
565 Short antennae gene of *Tribolium* is required for limb development and encodes the orthologue  
566 of the *Drosophila* Distal-less protein. *Development* 128, 287-297.
- 567 Bolognesi, R., Beermann, A., Farzana, L., Wittkopp, N., Lutz, R., Balavoine, G., Brown, S.J.,  
568 Schroder, R., 2008. *Tribolium* Wnts: evidence for a larger repertoire in insects with overlapping  
569 expression patterns that suggest multiple redundant functions in embryogenesis. *Dev Genes*  
570 *Evol* 218, 193-202.
- 571 Brook, W.J., Cohen, S.M., 1996. Antagonistic interactions between wingless and  
572 decapentaplegic responsible for dorsal-ventral pattern in the *Drosophila* Leg. *Science* 273,  
573 1373-1377.
- 574 Brown, S.J., Patel, N.H., Denell, R.E., 1994. Embryonic expression of the single *Tribolium*  
575 engrailed homolog. *Dev Genet* 15, 7-18.
- 576 Capellini, T.D., Di Giacomo, G., Salsi, V., Brendolan, A., Ferretti, E., Srivastava, D.,  
577 Zappavigna, V., Selleri, L., 2006. Pbx1/Pbx2 requirement for distal limb patterning is mediated  
578 by the hierarchical control of Hox gene spatial distribution and Shh expression. *Development*  
579 133, 2263-2273.
- 580 Choi, K.S., Lee, C., Maatouk, D.M., Harfe, B.D., 2012. Bmp2, Bmp4 and Bmp7 are co-required  
581 in the mouse AER for normal digit patterning but not limb outgrowth. *PLoS One* 7, e37826.
- 582 Cohn, M.J., 2011. Development of the external genitalia: conserved and divergent mechanisms  
583 of appendage patterning. *Dev Dyn* 240, 1108-1115.
- 584 Cygan, J.A., Johnson, R.L., McMahon, A.P., 1997. Novel regulatory interactions revealed by  
585 studies of murine limb pattern in Wnt-7a and En-1 mutants. *Development* 124, 5021-5032.
- 586 Damen, W.G., 2002. Parasegmental organization of the spider embryo implies that the  
587 parasegment is an evolutionary conserved entity in arthropod embryogenesis. *Development*  
588 129, 1239-1250.

- 589 Diaz-Benjumea, F.J., Cohen, B., Cohen, S.M., 1994. Cell interaction between compartments  
590 establishes the proximal-distal axis of *Drosophila* legs. *Nature* 372, 175-179.
- 591 Donoughe, S., Extavour, C.G., 2016. Embryonic development of the cricket *Gryllus*  
592 *bimaculatus*. *Dev Biol* 411, 140-156.
- 593 Gonzalez-Lazaro, M., Rosello-Diez, A., Delgado, I., Carramolino, L., Sanguino, M.A.,  
594 Giovinazzo, G., Torres, M., 2014. Two new targeted alleles for the comprehensive analysis of  
595 *Meis1* functions in the mouse. *Genesis* 52, 967-975.
- 596 Gredler, M.L., Larkins, C.E., Leal, F., Lewis, A.K., Herrera, A.M., Perriton, C.L., Sanger, T.J.,  
597 Cohn, M.J., 2014. Evolution of external genitalia: insights from reptilian development. *Sex Dev*  
598 8, 311-326.
- 599 Grimaldi, A., Tettamanti, G., Acquati, F., Bossi, E., Guidali, M.L., Banfi, S., Monti, L.,  
600 Valvassori, R., de Eguileor, M., 2008. A hedgehog homolog is involved in muscle formation and  
601 organization of *Sepia officinalis* (mollusca) mantle. *Dev Dyn* 237, 659-671.
- 602 Grimmel, J., Dorresteijn, A.W., Frobis, A.C., 2016. Formation of body appendages during  
603 caudal regeneration in *Platynereis dumerilii*: adaptation of conserved molecular toolsets.  
604 *EvoDevo* 7, 10.
- 605 Hogvall, M., Budd, G.E., Janssen, R., 2018. Gene expression analysis of potential morphogen  
606 signalling modifying factors in Panarthropoda. *EvoDevo* 9, 20.
- 607 Janssen, R., Prpic, N.M., Damen, W.G., 2004. Gene expression suggests decoupled dorsal  
608 and ventral segmentation in the millipede *Glomeris marginata* (Myriapoda: Diplopoda). *Dev Biol*  
609 268, 89-104.
- 610 Jiang, J., Struhl, G., 1996. Complementary and Mutually Exclusive Activities of  
611 Decapentaplegic and Wingless Organize Axial Patterning during *Drosophila* Leg Development.  
612 *Cell* 86, 401-409.
- 613 Kawakami, Y., Esteban, C.R., Matsui, T., Rodriguez-Leon, J., Kato, S., Izipisua Belmonte, J.C.,  
614 2004. Sp8 and Sp9, two closely related buttonhead-like transcription factors, regulate Fgf8  
615 expression and limb outgrowth in vertebrate embryos. *Development* 131, 4763-4774.
- 616 Kojima, T., Michiue, T., Orihara, M., Saigo, K., 1994. Induction of a mirror-image duplication of  
617 anterior wing structures by localized hedgehog expression in the anterior compartment of  
618 *Drosophila melanogaster* wing imaginal discs. *Gene* 148, 211-217.
- 619 Konigsmann, T., Turetzek, N., Pechmann, M., Prpic, N.M., 2017. Expression and function of  
620 the zinc finger transcription factor Sp6-9 in the spider *Parasteatoda tepidariorum*. *Dev Genes*  
621 *Evol* 227, 389-400.
- 622 Kroger, B., Vinther, J., Fuchs, D., 2011. Cephalopod origin and evolution: A congruent picture  
623 emerging from fossils, development and molecules. *BioEssays : news and reviews in*  
624 *molecular, cellular and developmental biology* 33, 602-613.
- 625 Lecuit, T., Cohen, S.M., 1997. Proximal-distal axis formation in the *Drosophila* leg. *Nature* 388,  
626 139-145.

- 627 Lee, P.N., Callaerts, P., de Couet, H.G., Martindale, M.Q., 2003. Cephalopod Hox genes and  
628 the origin of morphological novelties. *Nature* 424, 1061-1065.
- 629 Lemaire, J., 1970. Table de developpement embryonnaire de *Sepia officinalis*. L. (Mollusque  
630 Cephalopode). *Bull Soc Zool France*, 95:773–782. .
- 631 Lemons, D., Fritzenwanker, J.H., Gerhart, J., Lowe, C.J., McGinnis, W., 2010. Co-option of an  
632 anteroposterior head axis patterning system for proximodistal patterning of appendages in  
633 early bilaterian evolution. *Dev Biol* 344, 358-362.
- 634 Lewis, P.M., Dunn, M.P., McMahon, J.A., Logan, M., Martin, J.F., St-Jacques, B., McMahon,  
635 A.P., 2001. Cholesterol modification of sonic hedgehog is required for long-range signaling  
636 activity and effective modulation of signaling by Ptc1. *Cell* 105, 599-612.
- 637 Loomis, C.A., Kimmel, R.A., Tong, C.X., Michaud, J., Joyner, A.L., 1998. Analysis of the  
638 genetic pathway leading to formation of ectopic apical ectodermal ridges in mouse *Engrailed-1*  
639 mutant limbs. *Development* 125, 1137-1148.
- 640 Mercader, N., Leonardo, E., Azpiazu, N., Serrano, A., Morata, G., Martinez-A, C., Torres, M.,  
641 1999. Conserved regulation of proximodistal limb axis development by *Meis1/Hth*. *Nature* 402,  
642 425-429.
- 643 Minelli, A., 2000. Limbs and tail as evolutionarily diverging duplicates of the main body axis.  
644 *Evolution & development* 2, 157-165.
- 645 Minelli, A., 2003. *The Development of Animal Form: Ontogeny, Morphology, and Evolution*.  
646 Cambridge University Press.
- 647 Moczek, A.P., Nagy, L.M., 2005. Diverse developmental mechanisms contribute to different  
648 levels of diversity in horned beetles. *Evolution & development* 7, 175-185.
- 649 Moczek, A.P., Rose, D., Sewell, W., Kesselring, B.R., 2006. Conservation, innovation, and the  
650 evolution of horned beetle diversity. *Dev Genes Evol* 216, 655-665.
- 651 Nielsen, C., 2012. *Animal Evolution: Interrelationships of the Living Phyla*. OUP Oxford.
- 652 Nödl, M.T., Kerbl, A., Walz, M.G., Müller, G.B., de Couet, H.G., 2016. The cephalopod arm  
653 crown: appendage formation and differentiation in the Hawaiian bobtail squid *Euprymna*  
654 *scolopes*. *Front Zool* 13, 44.
- 655 Panganiban, G., Irvine, S.M., Lowe, C., Roehl, H., Corley, L.S., Sherbon, B., Grenier, J.K.,  
656 Fallon, J.F., Kimble, J., Walker, M., Wray, G.A., Swalla, B.J., Martindale, M.Q., Carroll, S.B.,  
657 1997. The origin and evolution of animal appendages. *Proc Natl Acad Sci U S A* 94, 5162-  
658 5166.
- 659 Parr, B.A., McMahon, A.P., 1995. Dorsalizing signal *Wnt-7a* required for normal polarity of D-V  
660 and A-P axes of mouse limb. *Nature* 374, 350-353.
- 661 Prpic, N.M., 2004. Homologs of *wingless* and *decapentaplegic* display a complex and dynamic  
662 expression profile during appendage development in the millipede *Glomeris marginata*  
663 (Myriapoda: Diplopoda). *Front Zool* 1, 6.



- 664 Prpic, N.M., 2008. Parasegmental appendage allocation in annelids and arthropods and the  
665 homology of parapodia and arthropodia. *Front Zool* 5, 17.
- 666 Prpic, N.M., Janssen, R., Wigand, B., Klingler, M., Damen, W.G., 2003. Gene expression in  
667 spider appendages reveals reversal of *exd/hth* spatial specificity, altered leg gap gene  
668 dynamics, and suggests divergent distal morphogen signaling. *Dev Biol* 264, 119-140.
- 669 Prpic, N.M., Tautz, D., 2003. The expression of the proximodistal axis patterning genes *Distal-*  
670 *less* and *dachshund* in the appendages of *Glomeris marginata* (Myriapoda: Diplopoda)  
671 suggests a special role of these genes in patterning the head appendages. *Dev Biol* 260, 97-  
672 112.
- 673 Prpic, N.M., Wigand, B., Damen, W.G., Klingler, M., 2001. Expression of *dachshund* in wild-  
674 type and *Distal-less* mutant *Tribolium* corroborates serial homologies in insect appendages.  
675 *Dev Genes Evol* 211, 467-477.
- 676 Pueyo, J.I., Couso, J.P., 2005. Parallels between the proximal-distal development of vertebrate  
677 and arthropod appendages: homology without an ancestor? *Curr Opin Genet Dev* 15, 439-446.
- 678 Rice, R.V., Mueller, R., Adelman, W.J., 1990. Tissue culture of squid neurons, glia, and muscle  
679 cells, in: Adelman, W.J., Arnold, J.M., Gilbert, D.L. (Eds.), *Squids as experimental animals*.  
680 Springer US.
- 681 Riddle, R.D., Johnson, R.L., Laufer, E., Tabin, C., 1993. Sonic hedgehog mediates the  
682 polarizing activity of the ZPA. *Cell* 75, 1401-1416.
- 683 Ruppert, E.E., Fox, R.S., Barnes, R.D., 2004. *Invertebrate Zoology: A Functional Evolutionary*  
684 *Approach*. Thomson-Brooks/Cole.
- 685 Salsi, V., Vigano, M.A., Cocchiarella, F., Mantovani, R., Zappavigna, V., 2008. *Hoxd13* binds in  
686 vivo and regulates the expression of genes acting in key pathways for early limb and skeletal  
687 patterning. *Dev Biol* 317, 497-507.
- 688 Sanchez-Salazar, J., Pletcher, M.T., Bennett, R.L., Brown, S.J., Dandamudi, T.J., Denell, R.E.,  
689 Doctor, J.S., 1996. The *Tribolium* decapentaplegic gene is similar in sequence, structure, and  
690 expression to the *Drosophila* *dpp* gene. *Dev Genes Evol* 206, 237-246.
- 691 Schaeper, N.D., Prpic, N.M., Wimmer, E.A., 2010. A clustered set of three Sp-family genes is  
692 ancestral in the Metazoa: evidence from sequence analysis, protein domain structure,  
693 developmental expression patterns and chromosomal location. *BMC Evol Biol* 10, 88.
- 694 Scherz, P.J., McGlinn, E., Nissim, S., Tabin, C.J., 2007. Extended exposure to Sonic hedgehog  
695 is required for patterning the posterior digits of the vertebrate limb. *Dev Biol* 308, 343-354.
- 696 Setton, E.V.W., Sharma, P.P., 2018. Cooption of an appendage-patterning gene cassette in  
697 the head segmentation of arachnids. *Proc Natl Acad Sci U S A* 115, E3491-E3500.
- 698 Shapiro, M.D., Hanken, J., Rosenthal, N., 2003. Developmental basis of evolutionary digit loss  
699 in the Australian lizard *Hemiergis*. *Journal of experimental zoology. Part B, Molecular and*  
700 *developmental evolution* 297, 48-56.



- 701 Shigeno, S., Sasaki, T., Moritaki, T., Kasugai, T., Vecchione, M., Agata, K., 2008. Evolution of  
702 the cephalopod head complex by assembly of multiple molluscan body parts: Evidence from  
703 *Nautilus* embryonic development. *Journal of morphology* 269, 1-17.
- 704 Shubin, N., Tabin, C., Carroll, S., 1997. Fossils, genes and the evolution of animal limbs.  
705 *Nature* 388, 639-648.
- 706 Shubin, N., Tabin, C., Carroll, S., 2009. Deep homology and the origins of evolutionary novelty.  
707 *Nature* 457, 818-823.
- 708 Smith, S.A., Wilson, N.G., Goetz, F.E., Feehery, C., Andrade, S.C., Rouse, G.W., Giribet, G.,  
709 Dunn, C.W., 2011. Resolving the evolutionary relationships of molluscs with phylogenomic  
710 tools. *Nature* 480, 364-367.
- 711 Tabin, C.J., Carroll, S.B., Panganiban, G., 1999. Out on a Limb: Parallels in Vertebrate and  
712 Invertebrate Limb Patterning and the Origin of Appendages. *American Zoologist* 39, 650-663.
- 713 Tarazona, O.A., Slota, L.A., Lopez, D.H., Zhang, G., Cohn, M.J., 2016. The genetic program  
714 for cartilage development has deep homology within Bilateria. *Nature* 533, 86-89.
- 715 Vieux-Rochas, M., Bouhali, K., Mantero, S., Garaffo, G., Provero, P., Astigiano, S., Barbieri, O.,  
716 Caratozzolo, M.F., Tullo, A., Guerrini, L., Lallemand, Y., Robert, B., Levi, G., Merlo, G.R., 2013.  
717 BMP-mediated functional cooperation between *Dlx5*/*Dlx6* and *Msx1*/*Msx2* during mammalian  
718 limb development. *PLoS One* 8, e51700.
- 719 Winchell, C.J., Jacobs, D.K., 2013. Expression of the *Lhx* genes *apterous* and *lim1* in an errant  
720 polychaete: implications for bilaterian appendage evolution, neural development, and muscle  
721 diversification. *EvoDevo* 4, 4.
- 722 Winchell, C.J., Valencia, J.E., Jacobs, D.K., 2010. Expression of *Distal-less*, *dachshund*, and  
723 *optomotor blind* in *Neanthes arenaceodentata* (Annelida, Nereididae) does not support  
724 homology of appendage-forming mechanisms across the Bilateria. *Dev Genes Evol* 220, 275-  
725 295.
- 726 Witte, F., Dokas, J., Neuendorf, F., Mundlos, S., Stricker, S., 2009. Comprehensive expression  
727 analysis of all Wnt genes and their major secreted antagonists during mouse limb development  
728 and cartilage differentiation. *Gene Expr Patterns* 9, 215-223.
- 729 Zhu, J., Nakamura, E., Nguyen, M.T., Bao, X., Akiyama, H., Mackem, S., 2008. Uncoupling  
730 Sonic hedgehog control of pattern and expansion of the developing limb bud. *Developmental*  
731 *cell* 14, 624-632.  
732

733 **Figure Legends**

734

735 **Figure 1. Development of arms and tentacles in the cuttlefish, *Sepia officinalis*.**

736 (A) Phylogenetic relationships of Mollusca based on phylogenomic data (Smith et al.,  
737 2011) illustrating the unique morphology of the cephalopod body plan compared to  
738 other mollusks. (B) OPT reconstruction of a cuttlefish hatchling showing positions of the  
739 limbs; only arms are visible (see also Supplementary Movie 1). (C to D), SEM of the  
740 ventral side of a cuttlefish arm (C) and tentacle (D). Suckers are pseudocolored blue.  
741 Note distal restriction of suckers in tentacle relative to arm. (E) OPT reconstruction  
742 illustrating the internally retracted tentacles. Specimens are same as in (B), but here the  
743 tentacles are displayed in orange and the rest of the tissue is rendered translucent (see  
744 also Supplementary Movie 2). (F and G) Phospho-histone H3 (PHH3) immunostaining  
745 at stage 15 shows localized clusters of proliferating cells at the onset of limb  
746 development (black arrowheads) but little proliferation in the interlimb region (open  
747 arrowhead). (F) PHH3 detection by colorimetric reaction with DAB in a whole mount. (G)  
748 PHH3 immunofluorescence (red) on limb cryosection (white bracket). Cell nuclei (blue)  
749 are labeled by Hoechst staining. (H and L) OPT reconstructions of cuttlefish embryos at  
750 stages 16 to 24. Cuttlefishes have five bilaterally symmetric limb pairs (ten limbs; eighth  
751 arms and two tentacles). Numbered arrowheads mark all five limbs/limb buds on the left  
752 side of each embryo. The left tentacle differentiates from position number four (orange  
753 arrowhead), whereas arms form from limb buds at the other positions (yellow  
754 arrowheads). See also Supplementary Movies 3-5. A, anterior; P, posterior; D, dorsal;  
755 V, ventral; Stm, stomodeum; Mnt, mantle. (M to O) SEM during early stages of cuttlefish  
756 limb development (stages 16 to 19). Morphogenesis of the limb is first observed as a  
757 slight swelling (M) that transforms into a limb bud (O) as proximodistal outgrowth  
758 progresses. D, dorsal; V, ventral. **p-s**, SEM at later stages of cuttlefish limb  
759 development (stages 21 to 25) showing the formation of sucker buds on the ventral  
760 surface of a developing limb. A primordial sucker band (yellow arrows) is observed  
761 along the ventral midline of a stage 21 limb bud (P). At later stages, the band cleaves  
762 superficially from the proximal end to form the sucker buds (pseudocolored blue in Q to  
763 S). Scale bars: 0.5 mm (C and D) and 100  $\mu$ m (M to S).

764  
765 **Figure 2. Molecular regionalization of proximodistal, anteroposterior, and**  
766  **dorsoventral axes during cephalopod limb development. (A)** OPT reconstruction of  
767 cuttlefish embryo at stage 20 showing all five limb buds on the left side of the embryo  
768 (arms, yellow arrowheads; tentacle, orange arrowhead). **(B to E)** OPT reconstructions  
769 showing four representative genes with polarized expression patterns along major axes  
770 of limb buds (gene expression indicated by orange/yellow). Proximodistally polarized  
771 expression of *Exd* (B) and *Wnt5* (C). Anteroposteriorly polarized expression of *Hh* (D),  
772 dorsoventrally polarized expression of *Bmp2/4* (E). **(F to O)**, *In situ* hybridizations of  
773 cuttlefish limb buds at stage 17 (left) and stage 20 (right) showing polarized patterns of  
774 expression along the proximodistal axis for *Exd* (F), *Hth* (G), *Dll* (H), *Dac* (I) and *Sp8/9*  
775 (J); the anteroposterior axis for *Hh* (K) and *Ptc* (L); and the dorsoventral axis for *Bmp2/4*  
776 (M), *En* (N) and *Sfrp1/2/5* (O). A, anterior; P, posterior; D, dorsal; V, ventral; Di, distal;  
777 Pr, proximal.

778  
779 **Figure 3. Expression of proximal identity genes *Exd* and *Hth* in arms and**  
780  **tentacles corresponds with distribution of suckers; Wnt signaling repressors are**  
781  **dorsally restricted. (A and B)** Compared to arms (A), tentacles (B) show a distally  
782 expanded domain of *Exd* expression in the proximal region of the limb. **(C and D)** A  
783 similar pattern of expression is detected for *Hth* during arm (C) and tentacle (D)  
784 development. Distal boundary of *Exd* and *Hth* expression marked by black arrowheads  
785 in (A to D). **(E)** Expanded expression of proximal identity genes correlates with the  
786 expanded sucker-free domain seen in tentacles compared to arms. **(F and H)** The Wnt  
787 ligands *Wnt1*, *Wnt5* and *Wnt7* show a distally restricted expression but no dorsoventral  
788 polarization at stages 17 and 20. **(I)** The Wnt signaling transcription factor *Tcf3/4* is also  
789 distally restricted but shows no dorsoventral polarization at stages 17 and 20. **(J and K)**  
790 Fluorescent nuclear stain SYBR Safe highlights limb buds (yellow arrowheads). Boxed  
791 region in (J) is enlarged in (K); white arrowhead marks interlimb region. **(L and M)** The  
792 Wnt ligand repressors *Notum* and *Sfrp1/2/5* are expressed in the dorsal interlimb region  
793 (black arrowhead in L and M; compare with K). *Sfrp1/2/5* expression expands into the  
794 dorsal limb bud (black arrows in M) in stage 19 embryos, whereas *Notum* stays dorsal

795 but proximally restricted (open arrowheads mark the limb buds in L). **(N and O)** The  
796 earliest sign of sucker formation can be detected by SEM as a slight swelling (N) and by  
797 *Notum* expression (O) on the ventral side of stage 21 limb buds. **(P and Q)** Expression  
798 of *Notum* is maintained through later stages of sucker morphogenesis, as seen in stage  
799 26 tentacles (lateral views).

800  
801 **Figure 4. Bmp signaling controls dorsoventral patterning and Hh signaling**  
802 **regulates anteroposterior patterning of cuttlefish limbs.** **(A to C)** Implantation of  
803 carrier beads loaded with the Bmp inhibitor Noggin (A) results in formation of ectopic  
804 sucker buds (n=8/12) on the dorsal surface of the limb (B), whereas PBS control beads  
805 (n=15/15) result in normal development of the dorsal limb (pseudocolored red)  
806 restriction of suckers (pseudocolored blue) to the vental side of the limb (C). **(D to F)**,  
807 *Hh*-expressing cells (taken from the funnel of a stage 24 donor embryo) grafted to the  
808 posterior side of a stage 17 cuttlefish limb bud (D) generates a posterior mirror-image  
809 limb duplication (n=7/12; yellow arrow in E), whereas no duplication (n=8/8) results  
810 when control (*Hh*-negative) cells are grafted to the same position (F). Sucker buds are  
811 pseudocolored blue in (E and F); sucker buds in duplicated limb marked with a white  
812 arrowhead. **(G and H)** Noggin beads induce ectopic expression of *Notum* on the dorsal  
813 side of the limb (G). Limbs receiving control PBS beads show normal expression of  
814 *Notum* ventrally (H). **(I and J)** Graft of *Hh*-expressing tissue to the posterior side of the  
815 limb induces ectopic domain of *Notum* prior to duplication of the limb (I; black  
816 arrowhead). Note the two separate domains of *Notum* expression in I compared to a  
817 single *Notum* expression domain in the limb with the *Hh*-negative control graft (J). **(K to**  
818 **P)** Transitory repression of Hh signaling by cyclopamine (K) during early stages of limb  
819 development disrupts the anteroposterior distribution of sucker bud rows (L, N, O).  
820 Cyclopamine-treated limbs showing complete loss of suckers in tentacles (L) and  
821 reduction in the number of sucker bud rows in arms (N and O). Control embryos treated  
822 with vehicle only (DMSO) develop the normal number of sucker bud rows in tentacles  
823 (M) and arms (P). Sucker buds are pseudocolored blue in (B, E, F, and M- P). Scale  
824 bars 100  $\mu$ m.

825

826 **Figure 5. Molecular patterning of the anteroposterior, proximodistal, and**  
827 **dorsoventral axes of developing limbs in vertebrates, arthropods, and**  
828 **cephalopods.** For each lineage, the top row shows schematic representations of a  
829 generalized limb bud and an adult limb in two different orientations. Axes are indicated  
830 to the left of each limb bud (A, anterior; Po, posterior; Pr, proximal; Di, distal; Do, dorsal;  
831 Ve, ventral) Bottom rows show limb buds with gene expression domains pink color).  
832 Vertebrate gene expression based on mouse limb development. Arthropod gene  
833 expression is a compound reconstruction from chelicerate, myriapod, and hexapod limb  
834 development in order to consolidate a complete set of pro-orthologous genes  
835 comparable to vertebrate and cephalopod lineages. Cephalopod gene expression is  
836 based on findings in this study from the cuttlefish *Sepia officinalis* and *Sepia bandensis*.  
837 The figure illustrates the conserved and divergent expression patterns of homologous  
838 (pro-orthologous) genes, some of which share equivalent roles in patterning the limb  
839 axes. The proximodistal axis displays conserved expression of transcription factors at  
840 opposite ends; *Htx* (pro-ortholog of vertebrate *Meis* genes) and *Exd* (pro-ortholog of  
841 vertebrate *Pbx* genes) are restricted proximally, whereas *Dll* (pro-ortholog of vertebrate  
842 *Dlx* genes), *Wnt5* (pro-ortholog of *Wnt5a*) and *Sp8/9* (pro-ortholog of vertebrate *Sp8*  
843 and *Sp9* genes, known as *Sp6-9* in some arthropods) show distally restricted  
844 expression. The typical expression pattern of *Dac* seen in arthropods (between  
845 proximally and distally restricted genes) is not strictly conserved in vertebrates (*Dac* pro-  
846 ortholog of vertebrate *Dach* genes) or cephalopods. However, *Dac* expression in non-  
847 locomotory arthropod appendages (e.g., mandibles) is distally restricted, resembling  
848 cephalopod *Dac* expression (Donoughe and Extavour, 2016). Expression patterns of  
849 the diverse family of *Wnt* genes shows interesting variation. Although, some members  
850 of the family show variation in their expression pattern (*Wnt1* and *Wnt7*), there is a  
851 general pattern of distal restriction of *Wnt* expression (represented here by *Wnt5*, but  
852 also seen in many other *Wnt* ligands) in the three lineages. At the level of individual *Wnt*  
853 members, *Wg* (pro-ortholog of vertebrate *Wnt1*) is restricted ventrally in arthropods but  
854 not in vertebrates or cephalopods, and *Wnt7a* (arthropod and cephalopod *Wnt7* genes  
855 are pro-orthologs of vertebrate *Wnt7a*) is restricted dorsally in vertebrates but not in  
856 arthropods or cephalopods. Restricted expression of *Wnt* ligands either dorsally or

857 ventrally has not been reported in cephalopods, but the dorsally restricted expression of  
858 the Wnt repressor *Sfrp1/2/5* suggests a role of polarized Wnt pathway activation in the  
859 control of the dorsoventral axis of cephalopod limbs, similar to vertebrates (by dorsal  
860 *Wnt7a*) and arthropods (by ventral *Wg*). There is a clear restriction of at least one Bmp  
861 ligand (vertebrate *Bmp7* and cephalopod *Bmp2/4*; pro-orthologs of arthropod *Dpp*) and  
862 the transcription factor *En* along the dorsoventral axis in these three lineages. Finally,  
863 polarized expression of *Hh* is conserved in the three lineages (posterior in vertebrates  
864 and arthropods, but anterior in cephalopods), which, together with the functional  
865 manipulations, indicates conservation of Hh signaling in patterning the anteroposterior  
866 limb axis in the three lineages. The asterisk (\*) in arthropod *Dac* indicates that some  
867 mouth appendages show a distal expression domain (Donoughe and Extavour, 2016)  
868 (Angelini and Kaufman, 2005) more similar to cephalopod *Dac* limb expression than to  
869 *Dac* expression in arthropod legs. Two asterisks (\*\*) indicate that *Wnt5* expression  
870 show variation in arthropods, with a sub-distal expression in chelicerates (Damen, 2002)  
871 but distal in hexapods (i.e. flour beetle) (Bolognesi et al., 2008). Three asterisks (\*\*\*)  
872 indicate that *Dpp* shows variation in its expression domain in arthropods, in some  
873 hexapods and chelicerates showing a distal expression domain whereas in Myriapods  
874 and other hexapods it is dorsally restricted as depicted here (Angelini and Kaufman,  
875 2005). Schematized gene expression domains for vertebrates and arthropods are from  
876 the following sources. Mouse gene expression: *Meis1* (Gonzalez-Lazaro et al., 2014),  
877 *Pbx1* (Capellini et al., 2006), *Sp8* (Kawakami et al., 2004), *Dlx5* (Vieux-Rochas et al.,  
878 2013), *Dach1* (Salsi et al., 2008), *Wnt1*, *Wnt5a*, *Wnt7a*, *Sfrp2* (Witte et al., 2009), *Shh*  
879 (Riddle et al., 1993), *Bmp7* (Choi et al., 2012) and *En1* (Loomis et al., 1998). Arthropod  
880 expression based on: Chelicerates, *Htx*, *Exd*, *Dll*, *Dac* (Prpic et al., 2003), *Sp8/9*  
881 (Konigsmann et al., 2017), *Wg* (Damen, 2002), *En* (Damen, 2002) and *Sfrp1/2/5*  
882 (Hogvall et al., 2018); Myriapods, *Htx*, *Exd*, *Dll*, *Dac* (Prpic and Tautz, 2003), *Sp8/9*  
883 (Setton and Sharma, 2018), *Wg*, *Dpp* (Prpic, 2004), *Wnt5*, *Wnt7*, *Hh*, *En* (Janssen et al.,  
884 2004), *Sfrp1/2/5* (Hogvall et al., 2018); Hexapods, flour beetle, *Htx*, *Exd* (Prpic et al.,  
885 2003), *Sp8/9* (Schaeper et al., 2010), *Dll* (Beermann et al., 2001), *Dac* (Prpic et al.,  
886 2001), *Wg*, *Wnt5* (Bolognesi et al., 2008), *Dpp* (Sanchez-Salazar et al., 1996), *En*

887 (Brown et al., 1994); Hexapods, cricket, *Htx*, *Exd*, *Dll*, *Dac*, *Wg*, *Hh*, *Dpp*, *En* (Donoughe  
888 and Extavour, 2016).



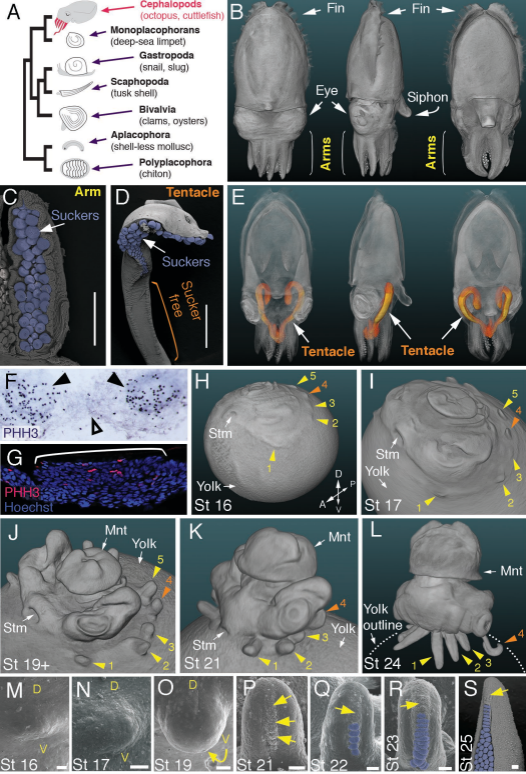



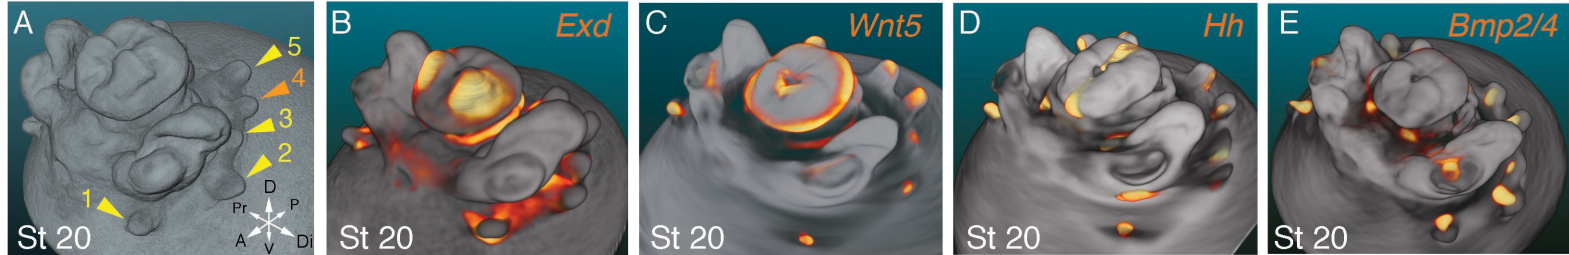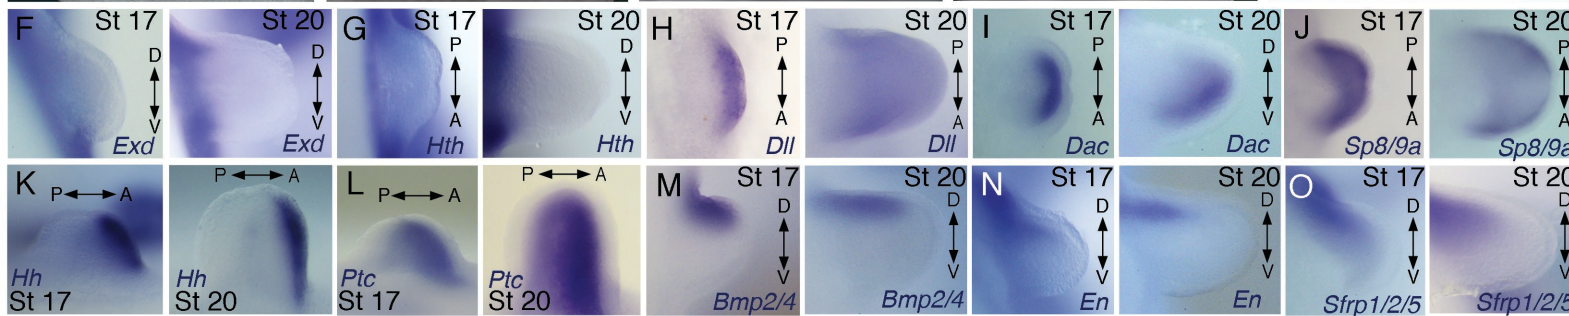

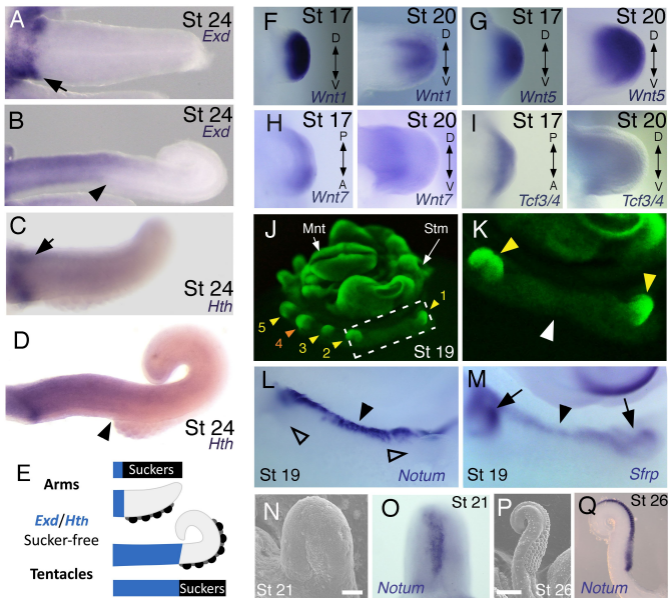

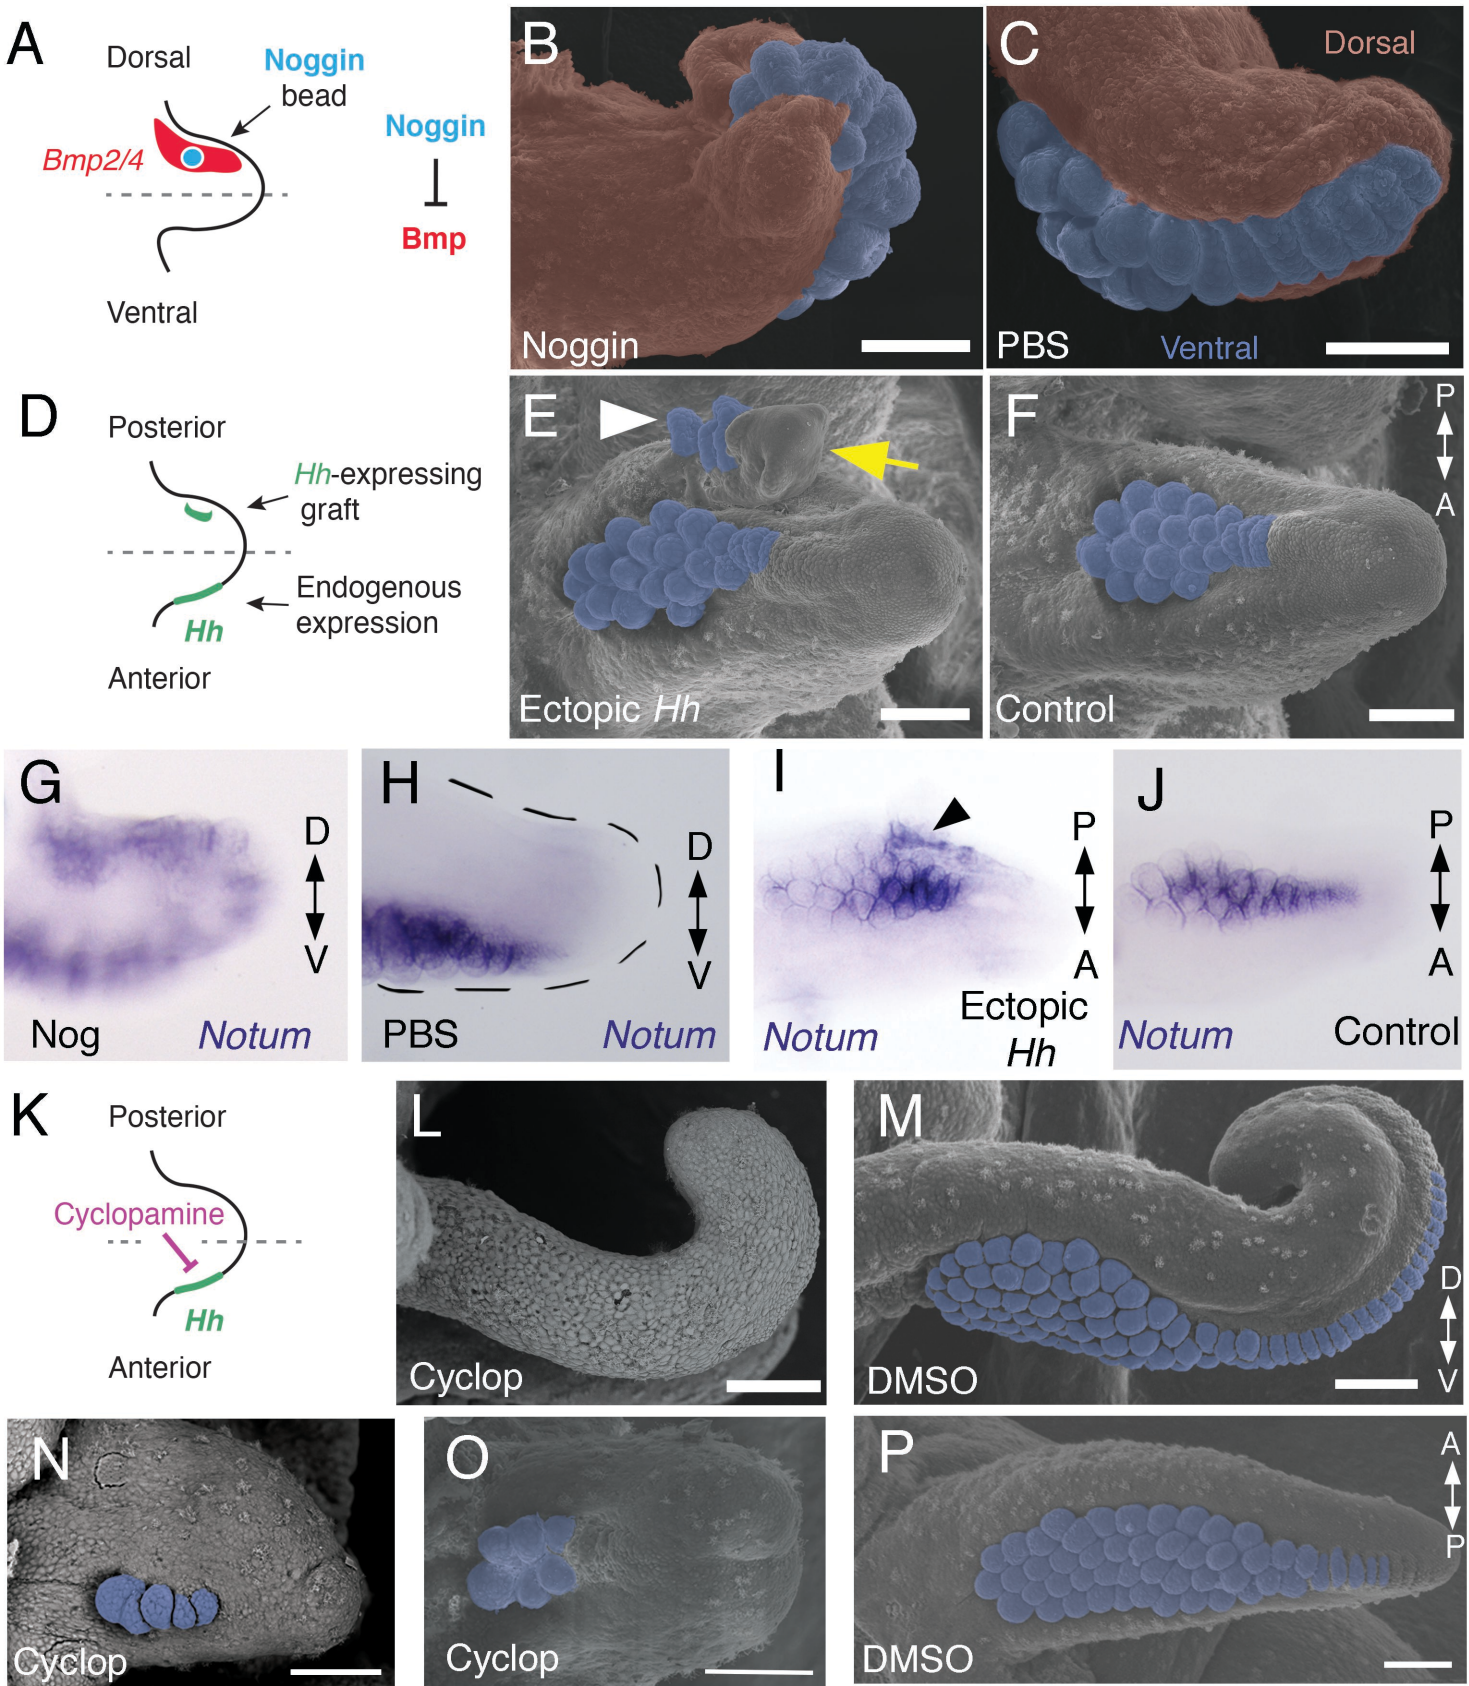



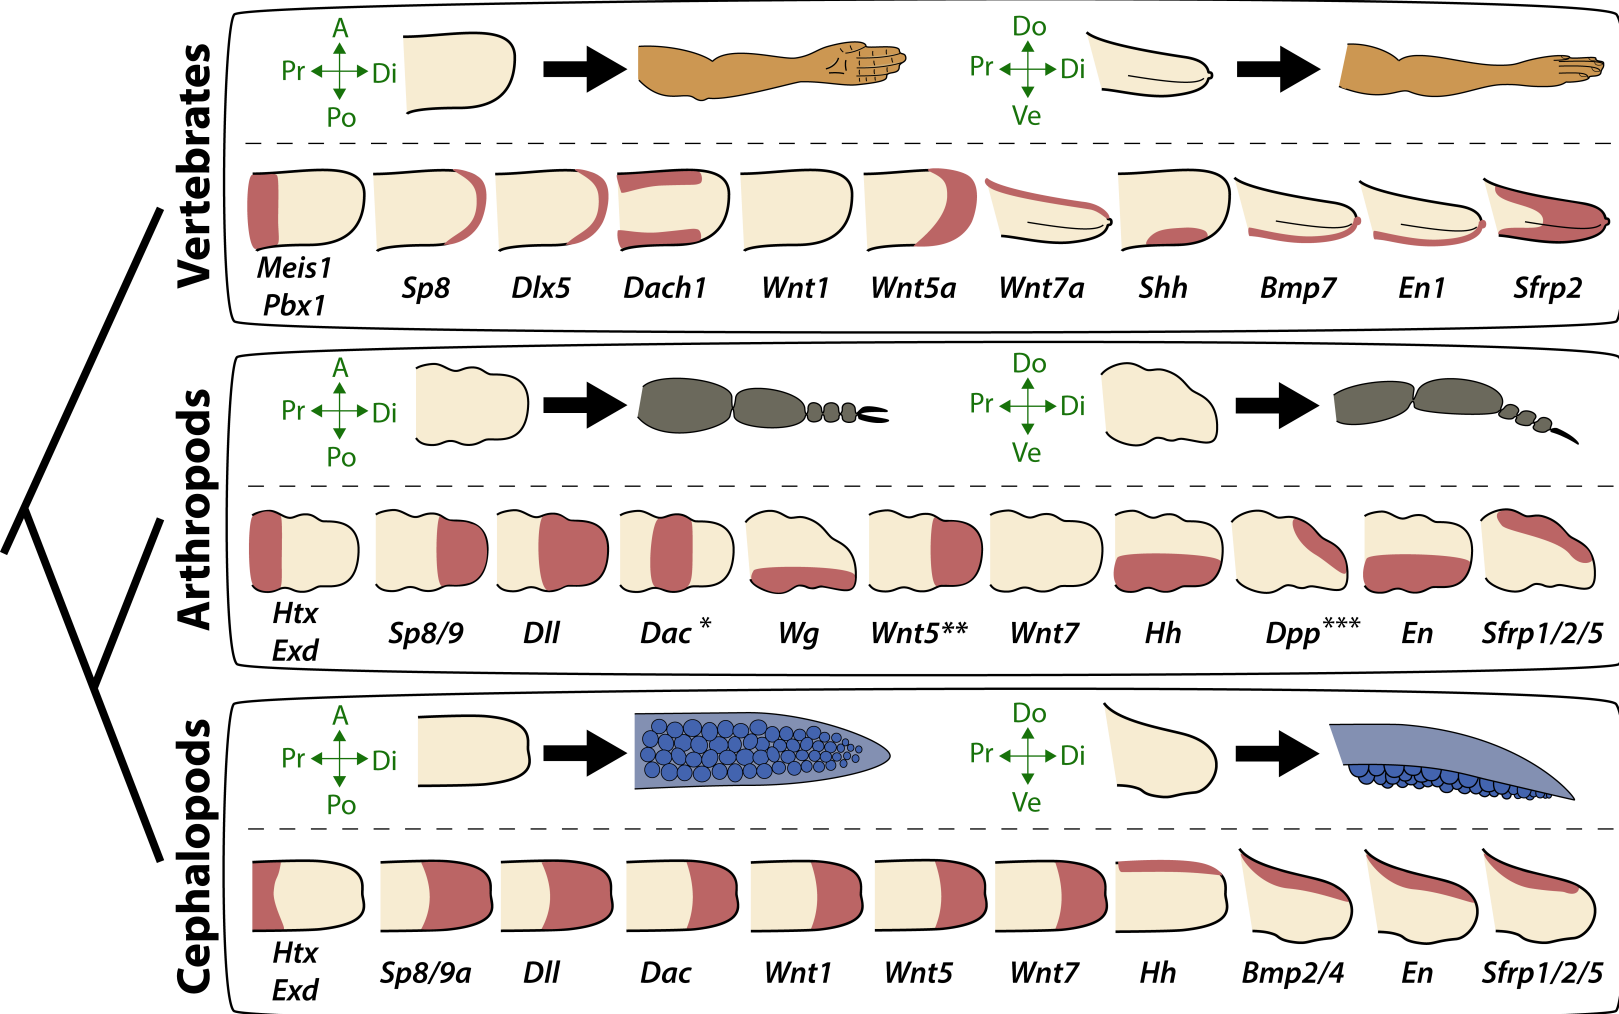

## **Evolution of limb development in cephalopod mollusks**

**Authors: Tarazona, Lopez, Slota, and Cohn**

### **Supplementary materials**

Figure 1 - figure supplement 1;

Figure 1 - Supplementary Movies 1 to 5

Figure 2 - figure supplements 1 to 10

Figure 2 - Supplementary file 1

Figure 3 - figure supplement 1

Figure 3 – figure supplement 2

Figure 3 – Supplementary file 1

Figure 4 - figure supplement 1

Figure 5 – figure supplement 1

## Legends to Figure Supplements

### **Figure 1 supplements**

**Figure 1 – figure supplement 1.** Sucker morphogenesis. All panels show scanning electron micrographs; scale bars, 100  $\mu\text{m}$ . (**A** and **B**) Sucker buds are arranged in parallel rows along the anteroposterior axis, with four rows in arms (A) and eight rows in tentacles (B). (**C** to **G**) Sucker formation progresses from distal to proximal. Colored squares in c are shown at higher magnification in d-g. Superficial cleavage of the proximal side of the primordial sucker band in (D) and segregation of the recently formed sucker buds in (E). Early sucker bud cells (G) form a dome-shaped outline compared to the rather flattened morphology of the non-sucker forming surface epithelium (F). (**H** and **I**) Higher magnification of sucker buds in a cuttlefish hatchling showing that sucker differentiation is not yet complete in hatchlings (H) compared to the differentiated suckers found in more mature individuals (I), which indicates that a substantial portion of sucker development occurs during post hatchling development.

**Figure 1- supplementary movie 1.** OPT 3D reconstruction showing cuttlefish hatchling morphology.

**Figure 1- supplementary movie 2.** OPT 3D reconstruction showing the internal location of the tentacles in a cuttlefish hatchling. Tentacles in orange, other parts of the body in gray (partially translucent).

**Figure 1- supplementary movie 3.** OPT 3D reconstruction showing morphology of a cuttlefish embryo at stage 17. Embryo is positioned on top of the yolk. The early limb buds (8 arm buds and 2 tentacle buds) can be seen around the margin of the embryo.

**Figure 1- supplementary movie 4.** OPT 3D reconstruction showing morphology of a cuttlefish embryo at late stage 19.

**Figure 1- supplementary movie 5.** OPT 3D reconstruction showing the morphology of a cuttlefish embryo at stage 24.

Arm

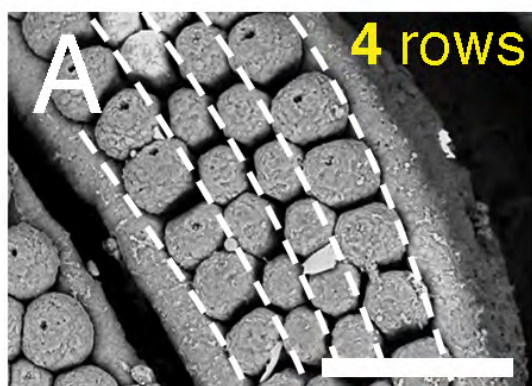

Tentacle

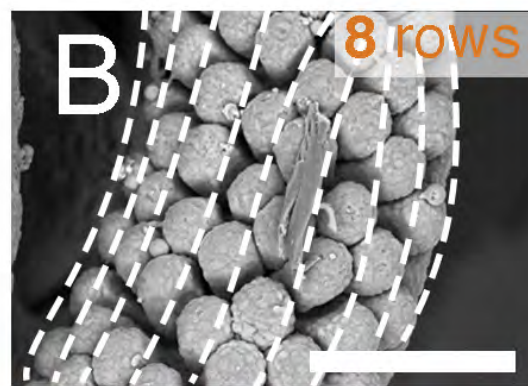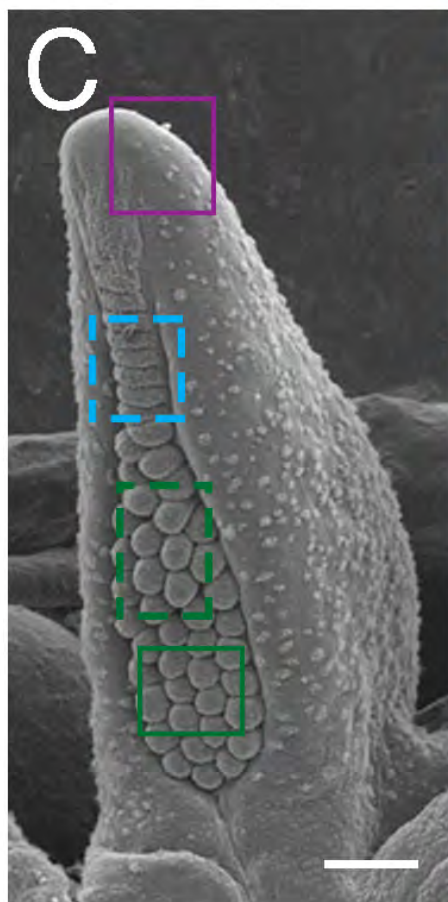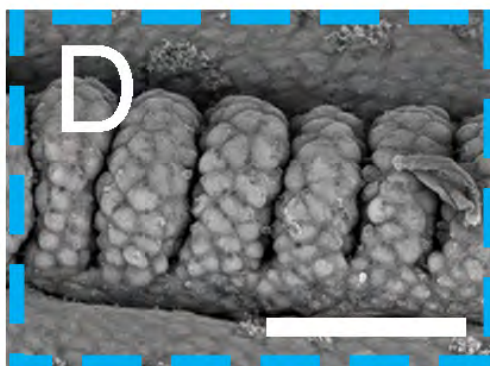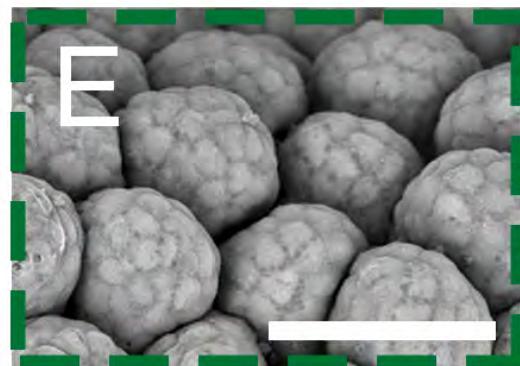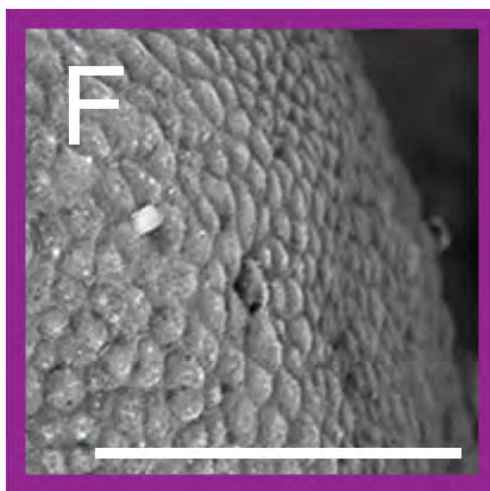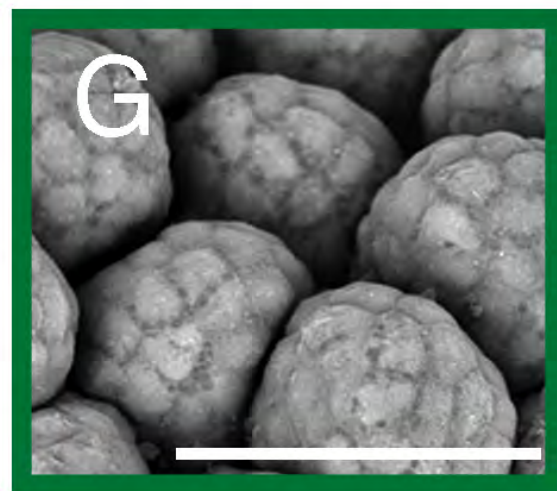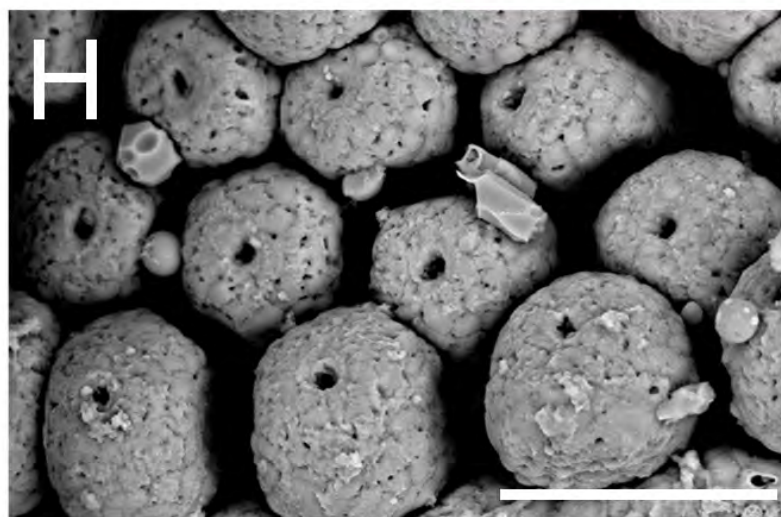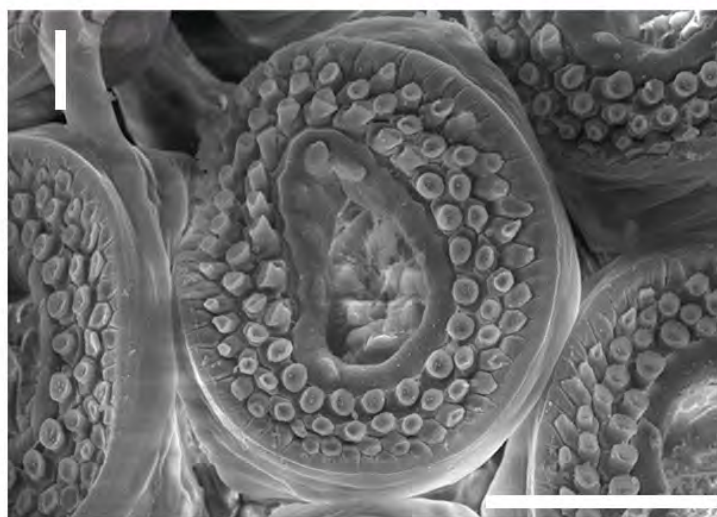



## **Figure 2 supplements**

**Figure 2 – figure supplement 1.** Molecular phylogenetic reconstruction using maximum likelihood implemented in RAxML of *Wnt* family ligands isolated in this study. Arrows mark the phylogenetic placement of 4 cuttlefish *Wnt* sequences.

**Figure 2 – figure supplement 2.** Molecular phylogenetic reconstruction using maximum likelihood implemented in RAxML of *Pan/Tcf* transcription factors isolated in this study. The arrow marks the phylogenetic placement of one cuttlefish *Tcf* sequences.

**Figure 2 – figure supplement 3.** Molecular phylogenetic reconstruction using maximum likelihood implemented in RAxML of *Dac/Dach* transcription factors isolated in this study. The arrow marks the phylogenetic placement of one cuttlefish *Dac* sequences.

**Figure 2– figure supplement 4.** Molecular phylogenetic reconstruction using maximum likelihood implemented in RAxML of *Sp* family of transcription factors isolated in this study. The arrow marks the phylogenetic placement of one cuttlefish *Sp* sequence.

**Figure 2 – figure supplement 5.** Molecular phylogenetic reconstruction using maximum likelihood implemented in RAxML of Homeodomain family of transcription factors isolated in this study. Arrows mark the phylogenetic placement of 4 cuttlefish Homeodomain sequences.

**Figure 2 – figure supplement 6.** Molecular phylogenetic reconstruction using maximum likelihood implemented in RAxML of *Notum* Wnt inhibitors isolated in this study. The arrow marks the phylogenetic placement of one cuttlefish *Notum* sequence.

**Figure 2 – figure supplement 7.** Molecular phylogenetic reconstruction using maximum likelihood implemented in RAxML of *Frizzled* Wnt co-receptors and *Sfrp* extracellular Wnt repressors isolated in this study. Arrows mark the phylogenetic placement of one cuttlefish *Frizzled* and one *Sfrp*.

**Figure 2 – figure supplement 8.** Molecular phylogenetic reconstruction using maximum likelihood implemented in RAxML of *Tgf $\beta$*  family ligands isolated in this study. The arrow marks the phylogenetic placement of cuttlefish *Bmp2/4*.

**Figure 2 – figure supplement 9.** Molecular phylogenetic reconstruction using maximum likelihood implemented in RAxML of *Hh* ligand previously isolated (PMID:27111511) in this study. The arrow marks the phylogenetic placement of cuttlefish *Hh* sequence.

**Figure 2 – figure supplement 10.** Molecular phylogenetic reconstruction using maximum likelihood implemented in RAxML of Hedgehog *Patch* receptors isolated in this study. The arrow marks the phylogenetic placement of cuttlefish *Patched*.

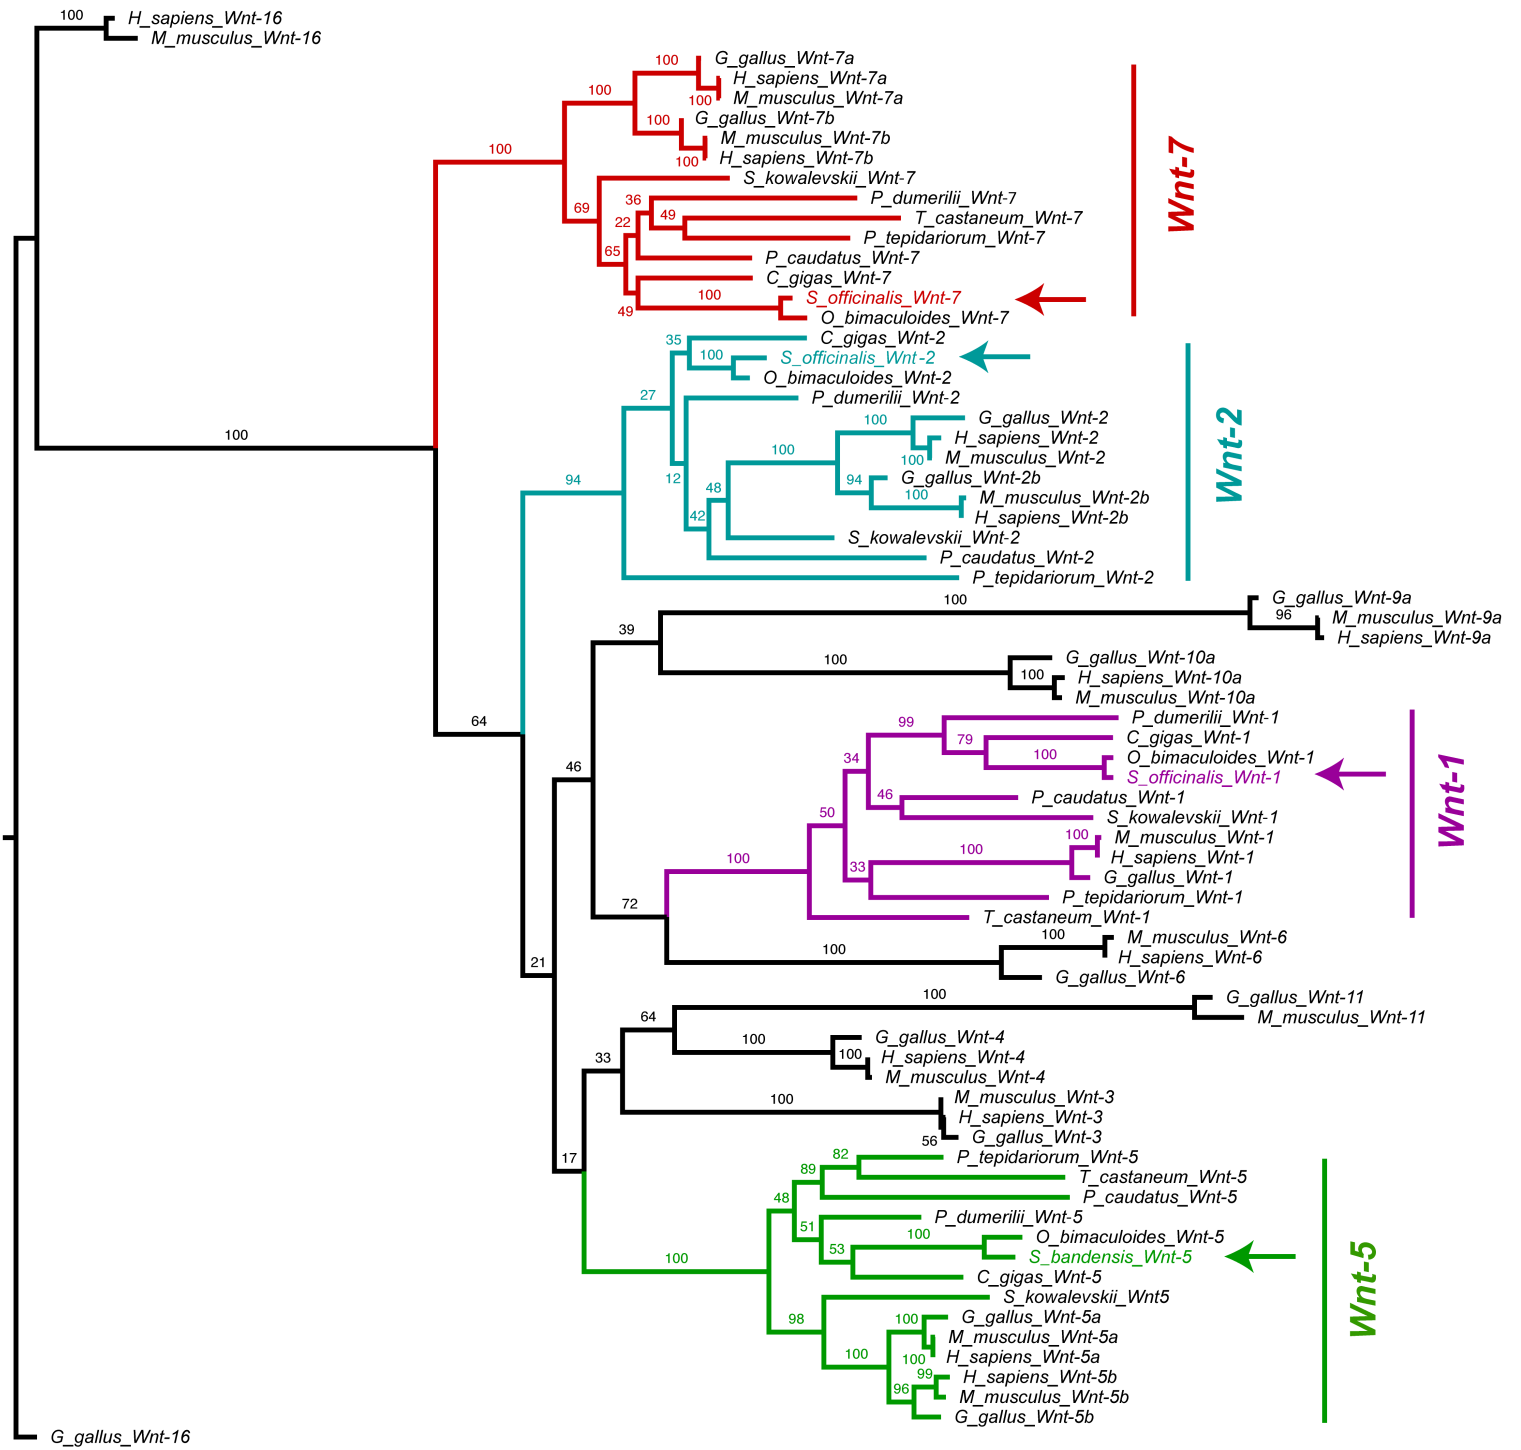

0.5

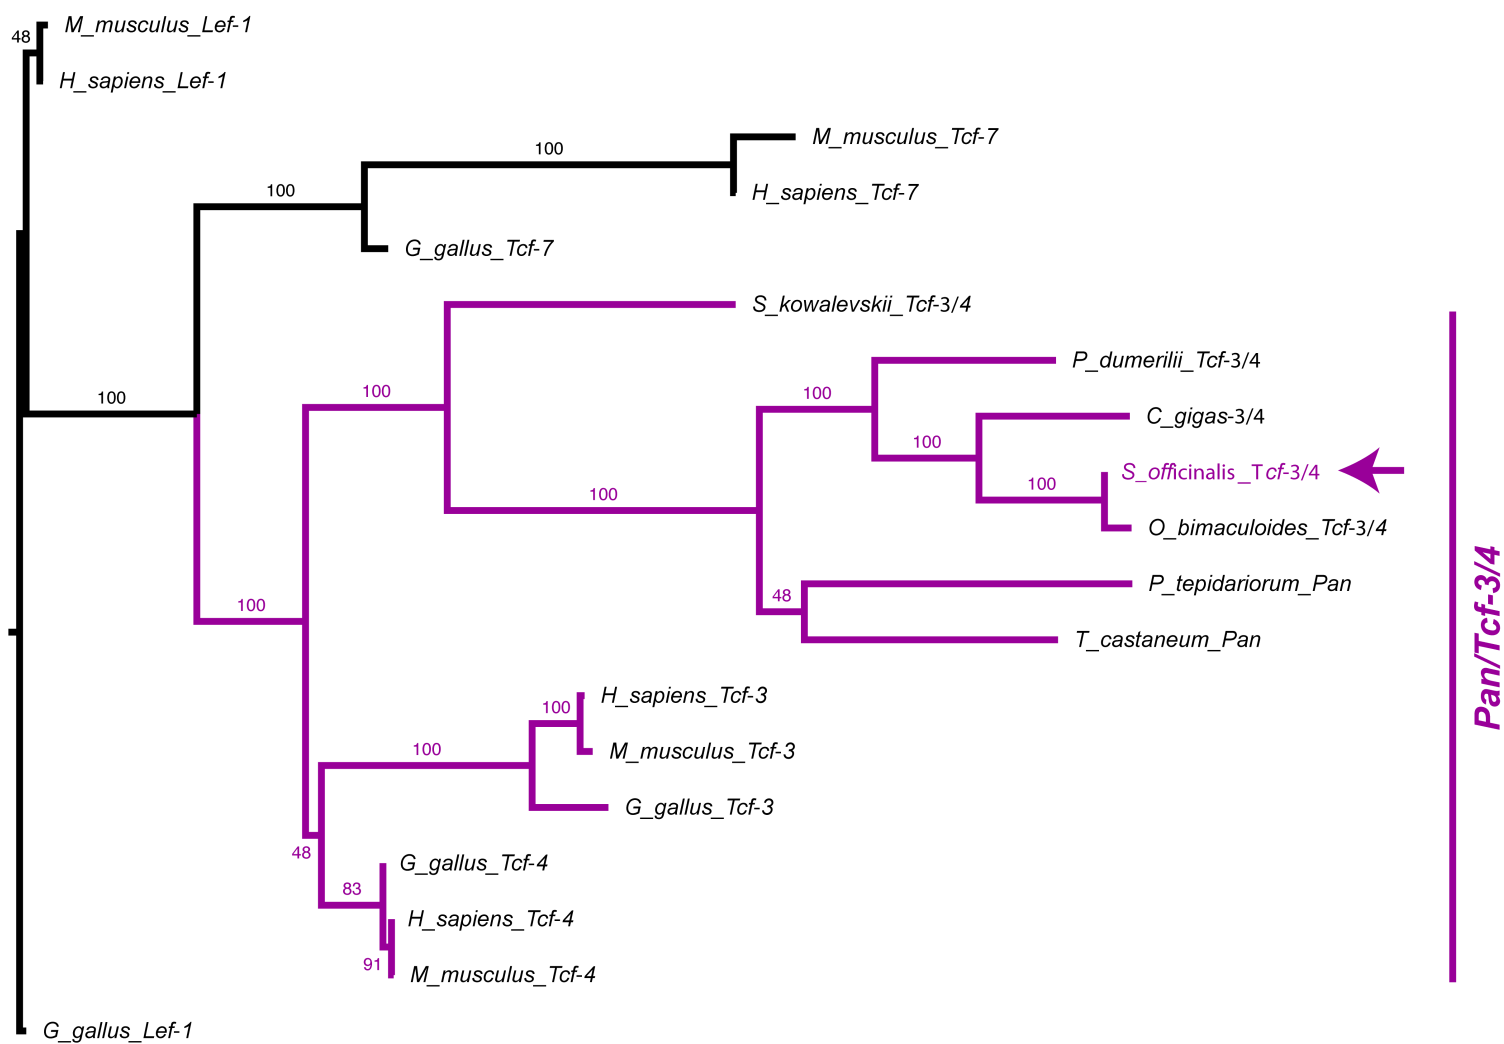

0.3

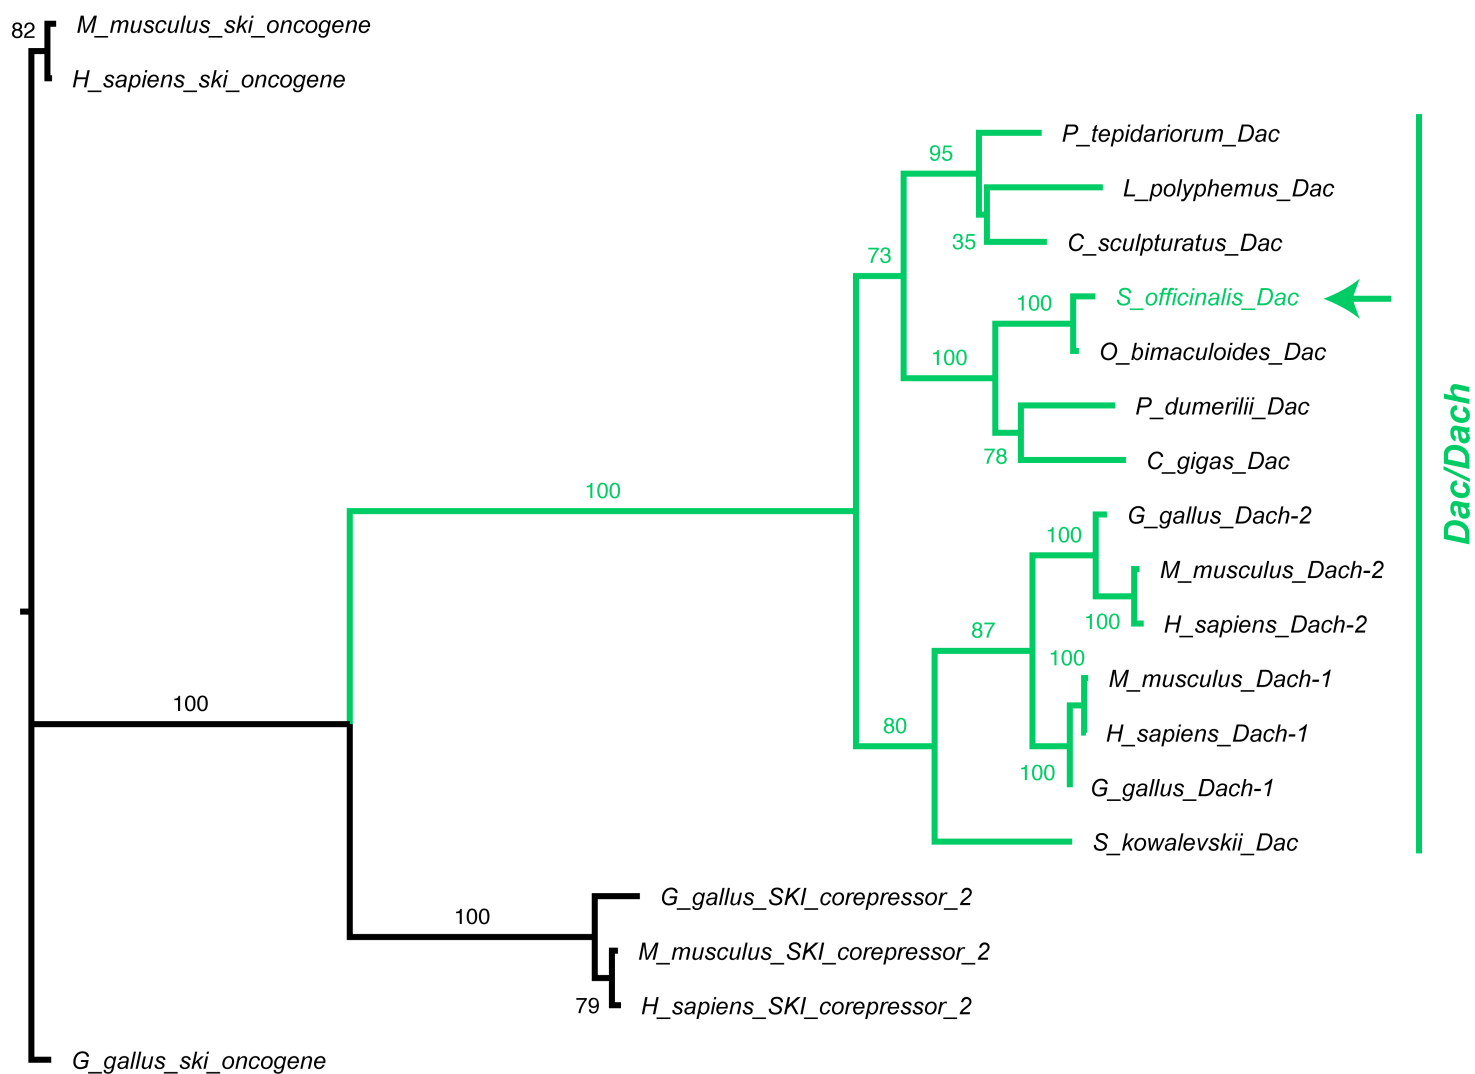

0.7

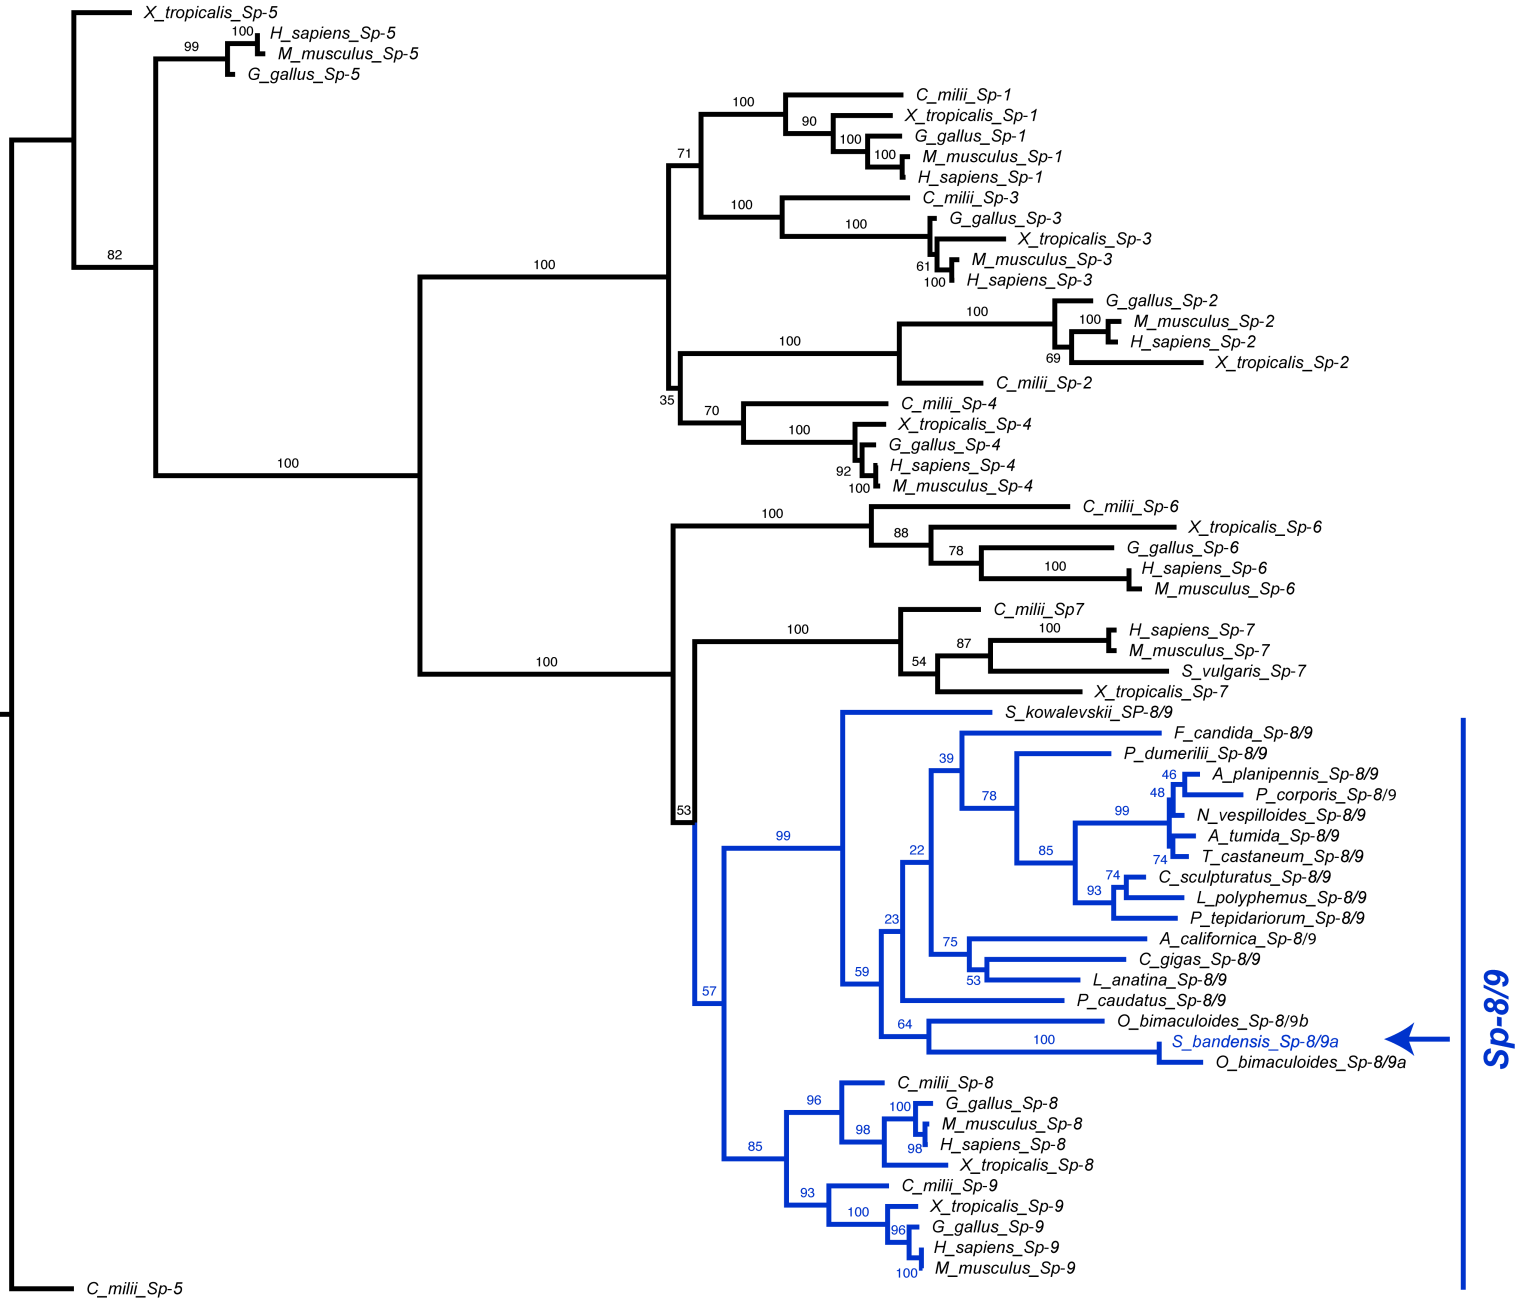

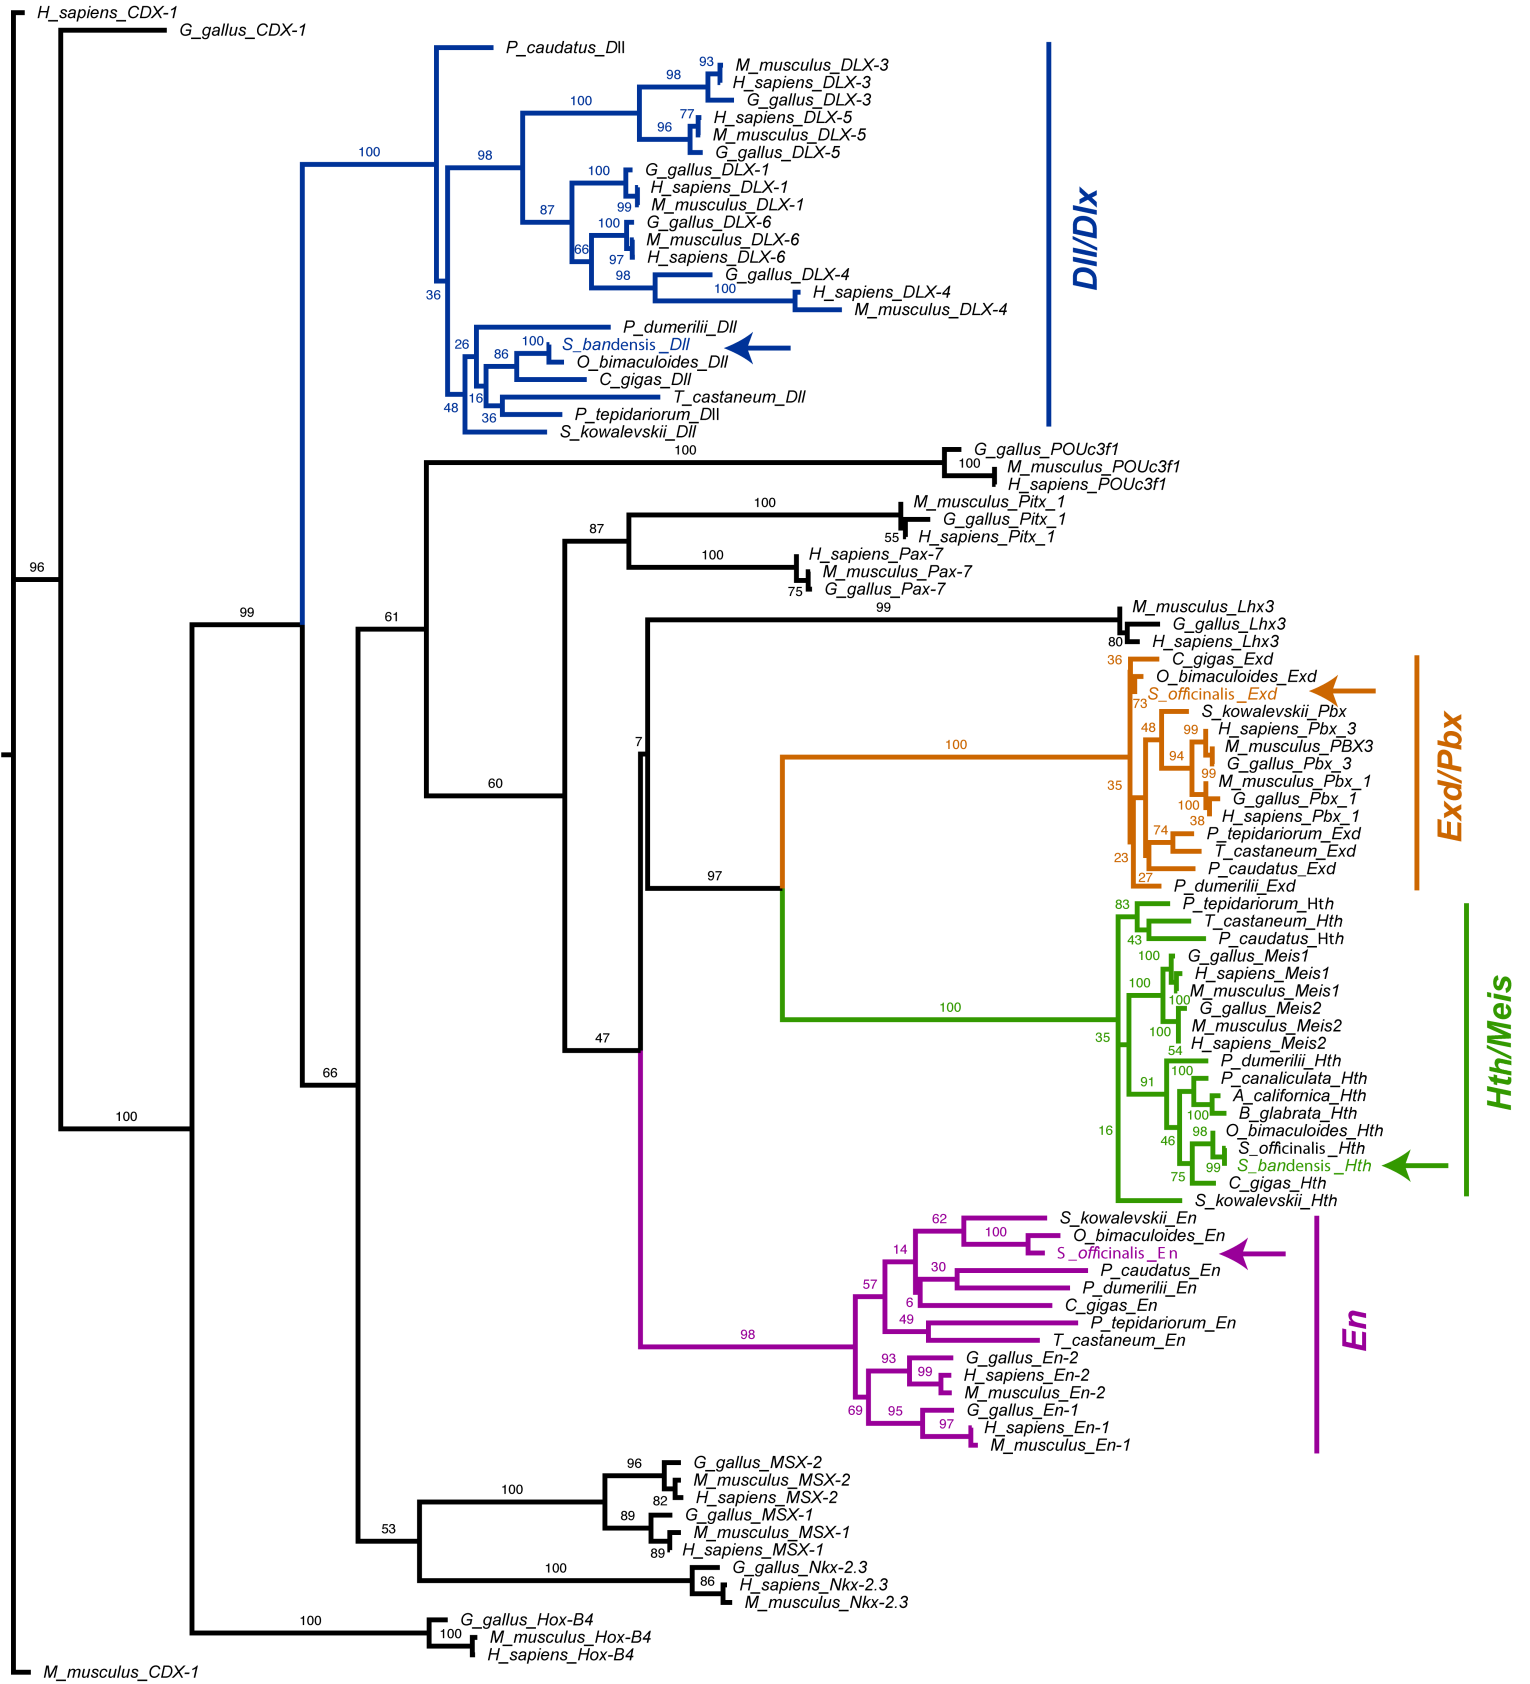

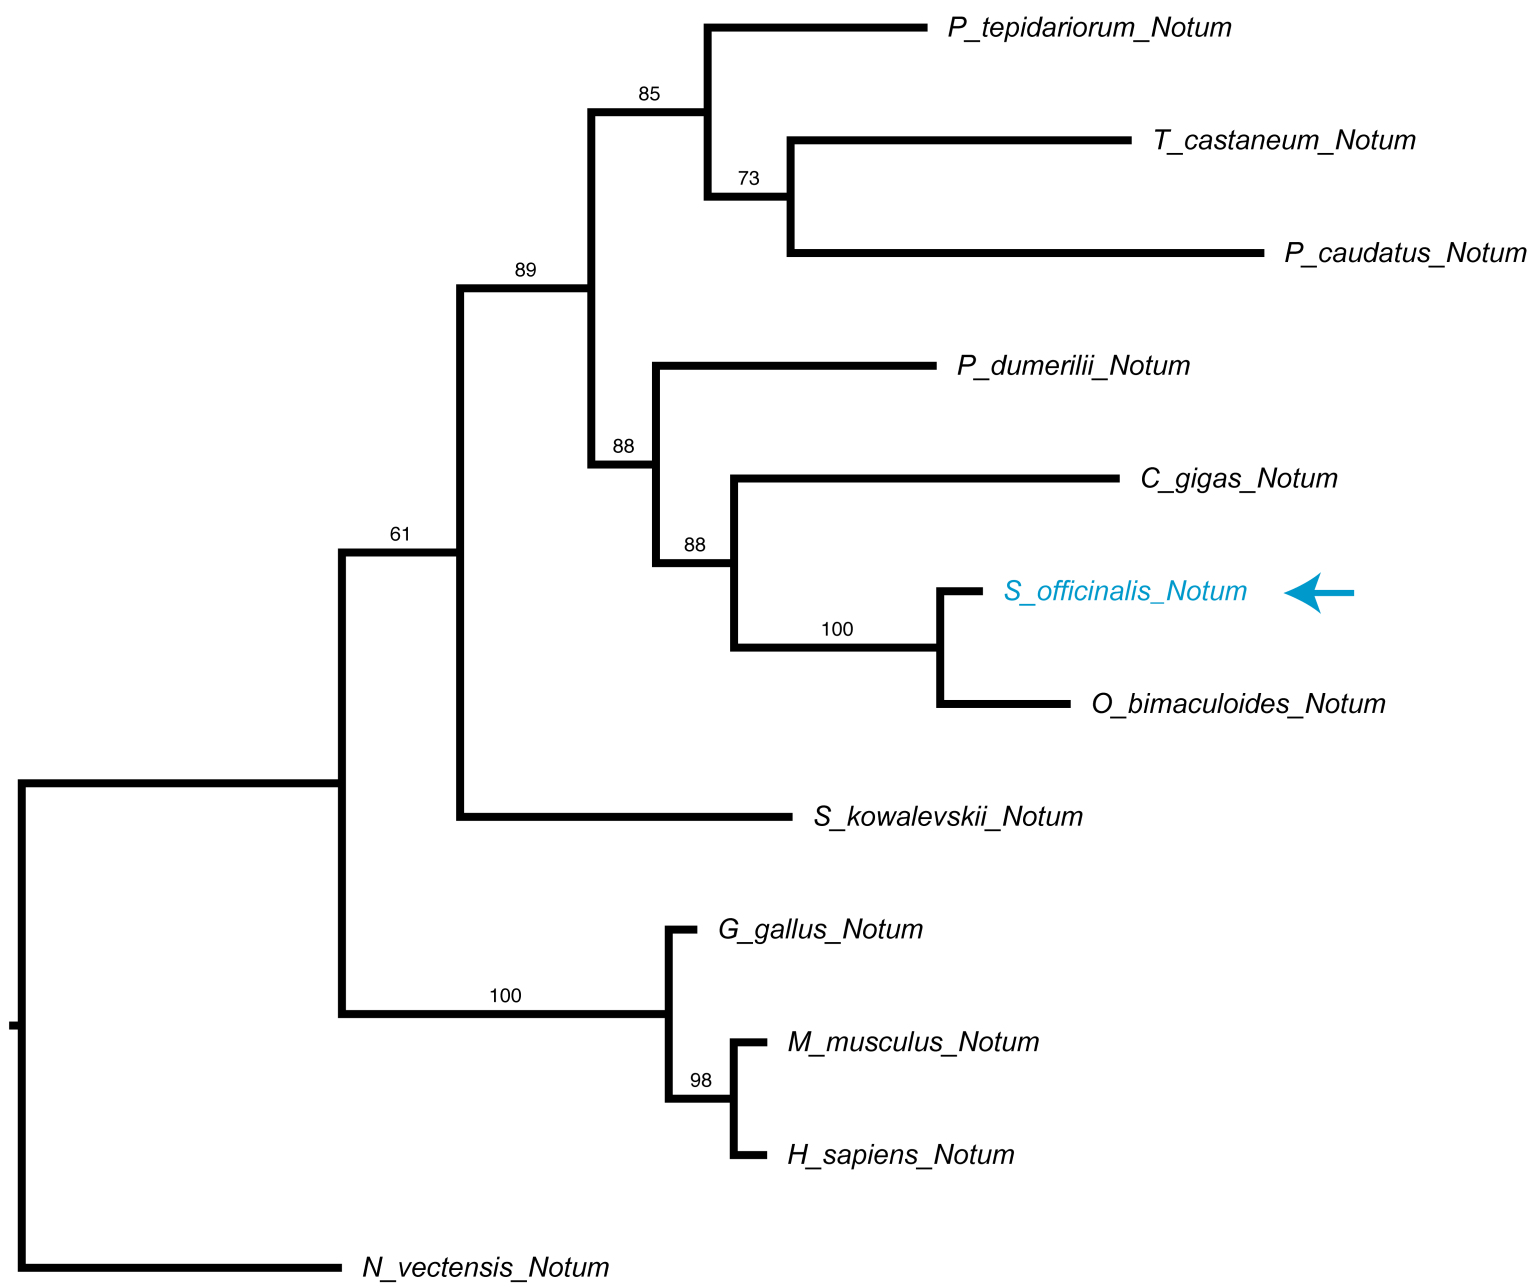

0.3



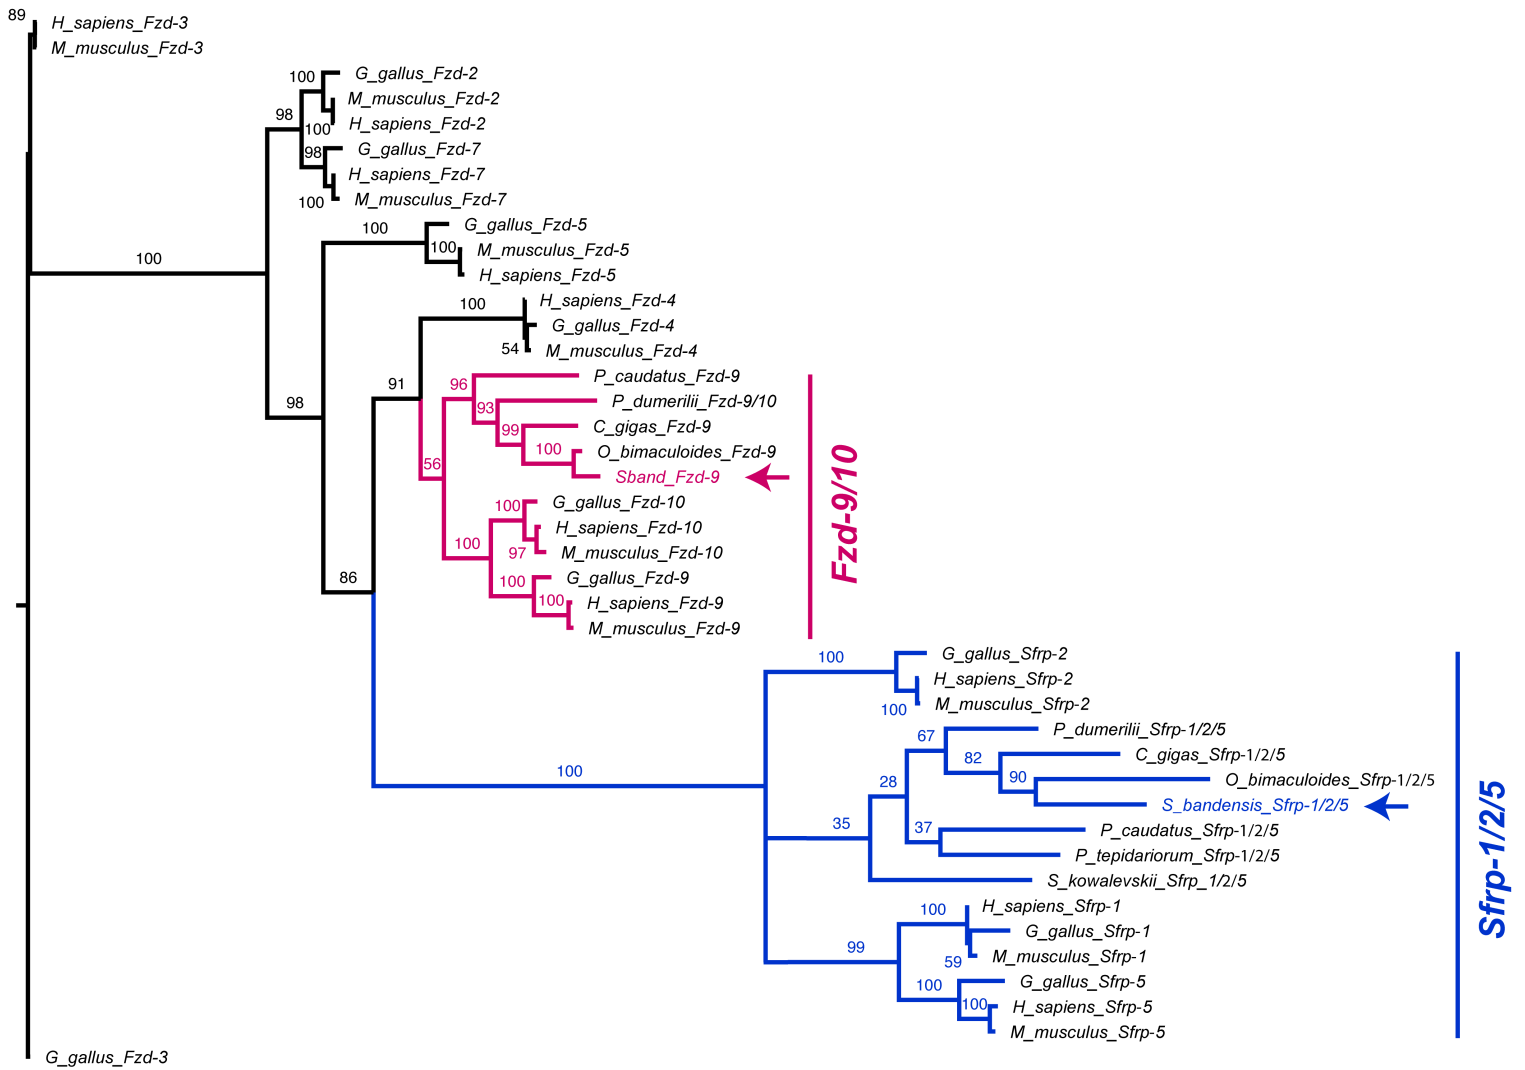

0.8

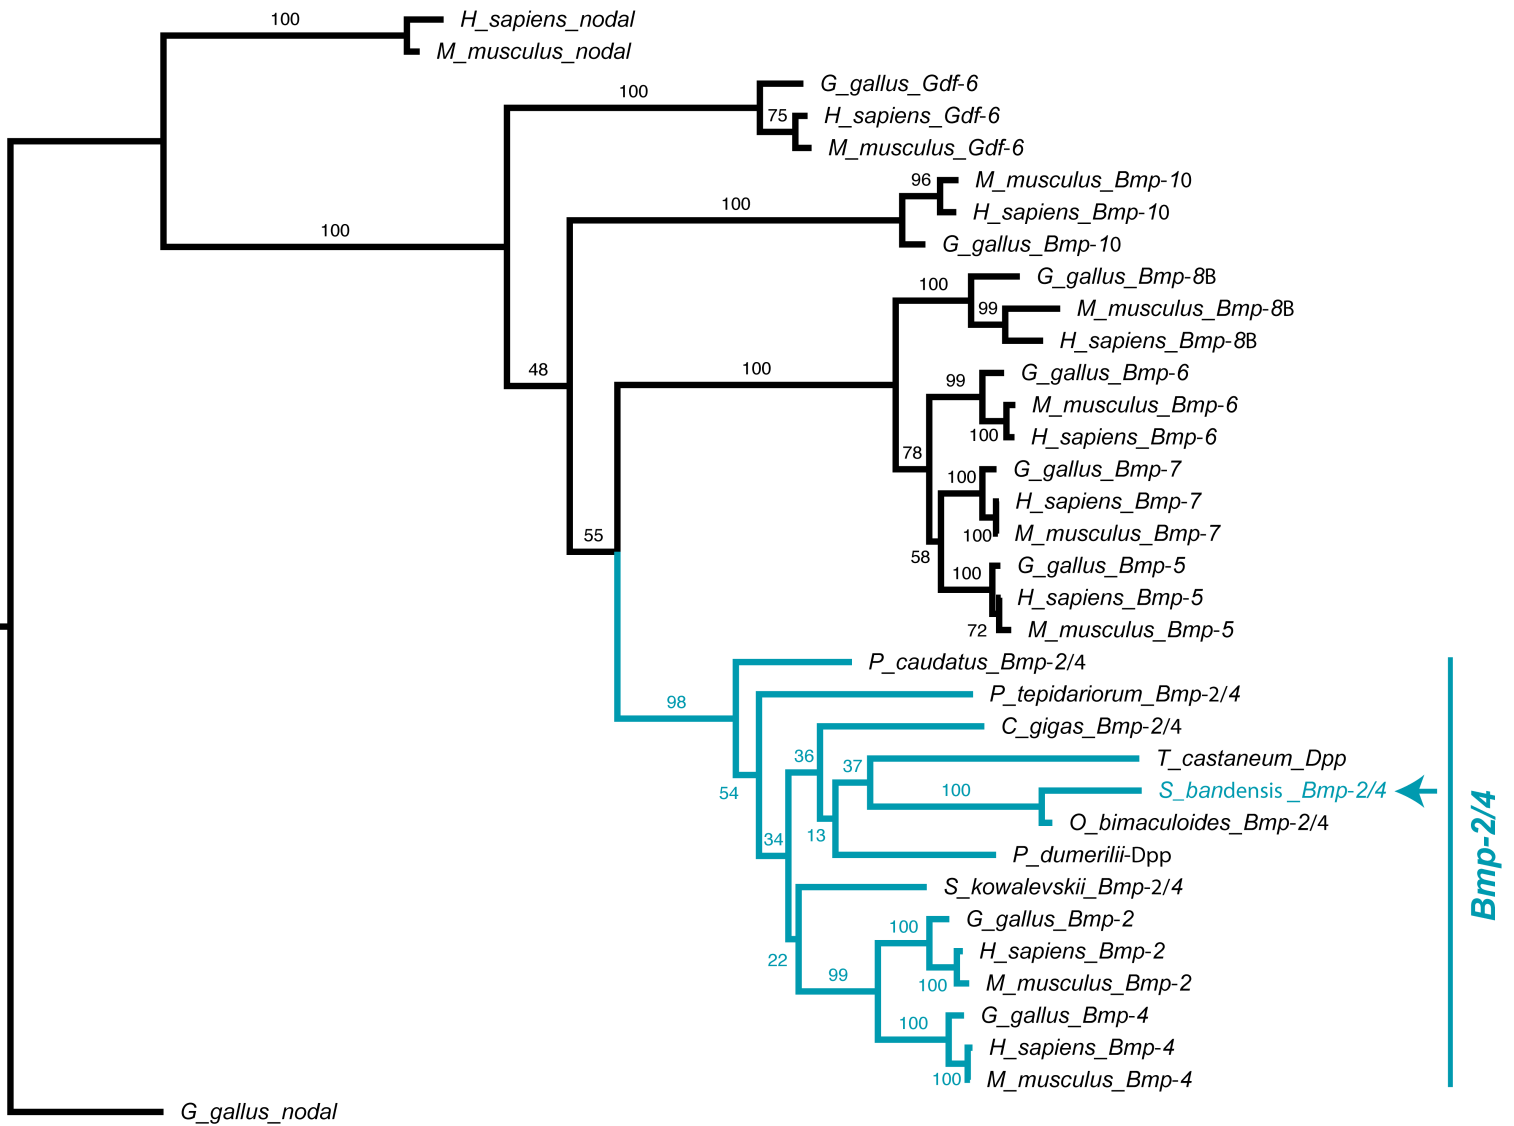

0.7

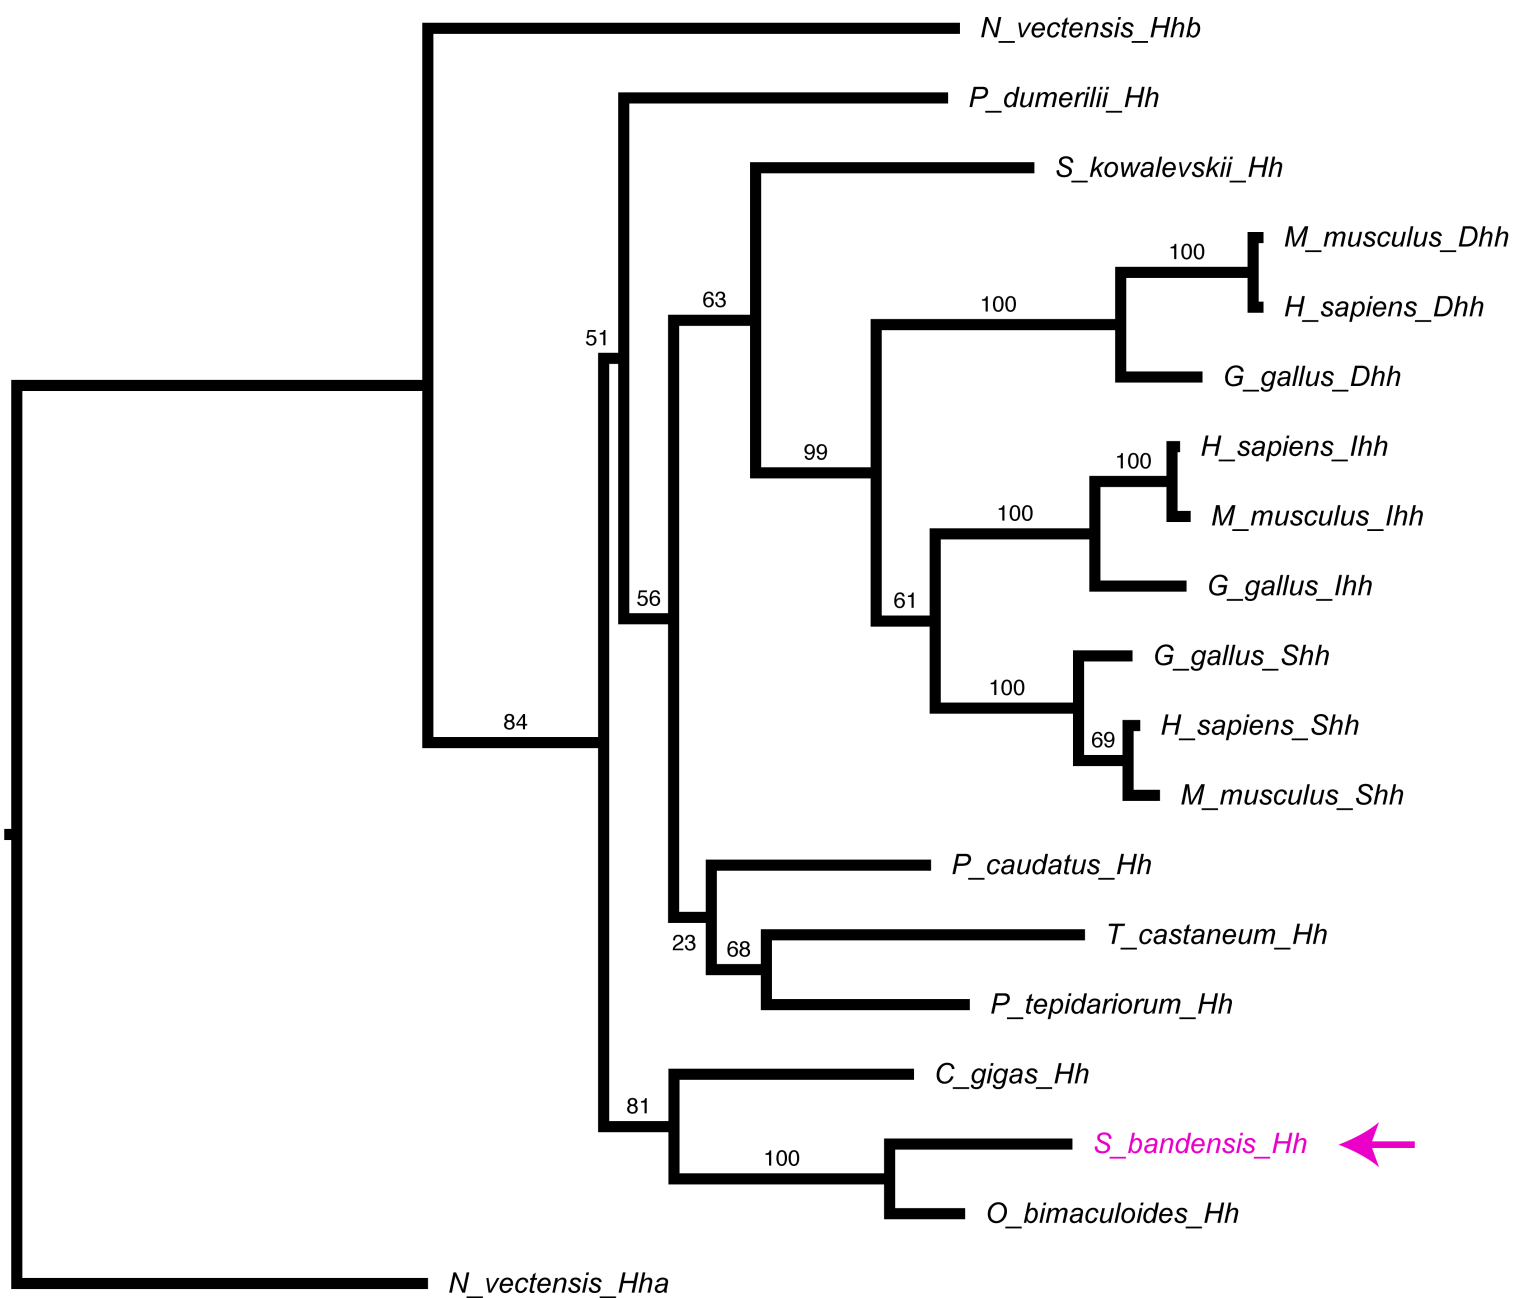

0.3

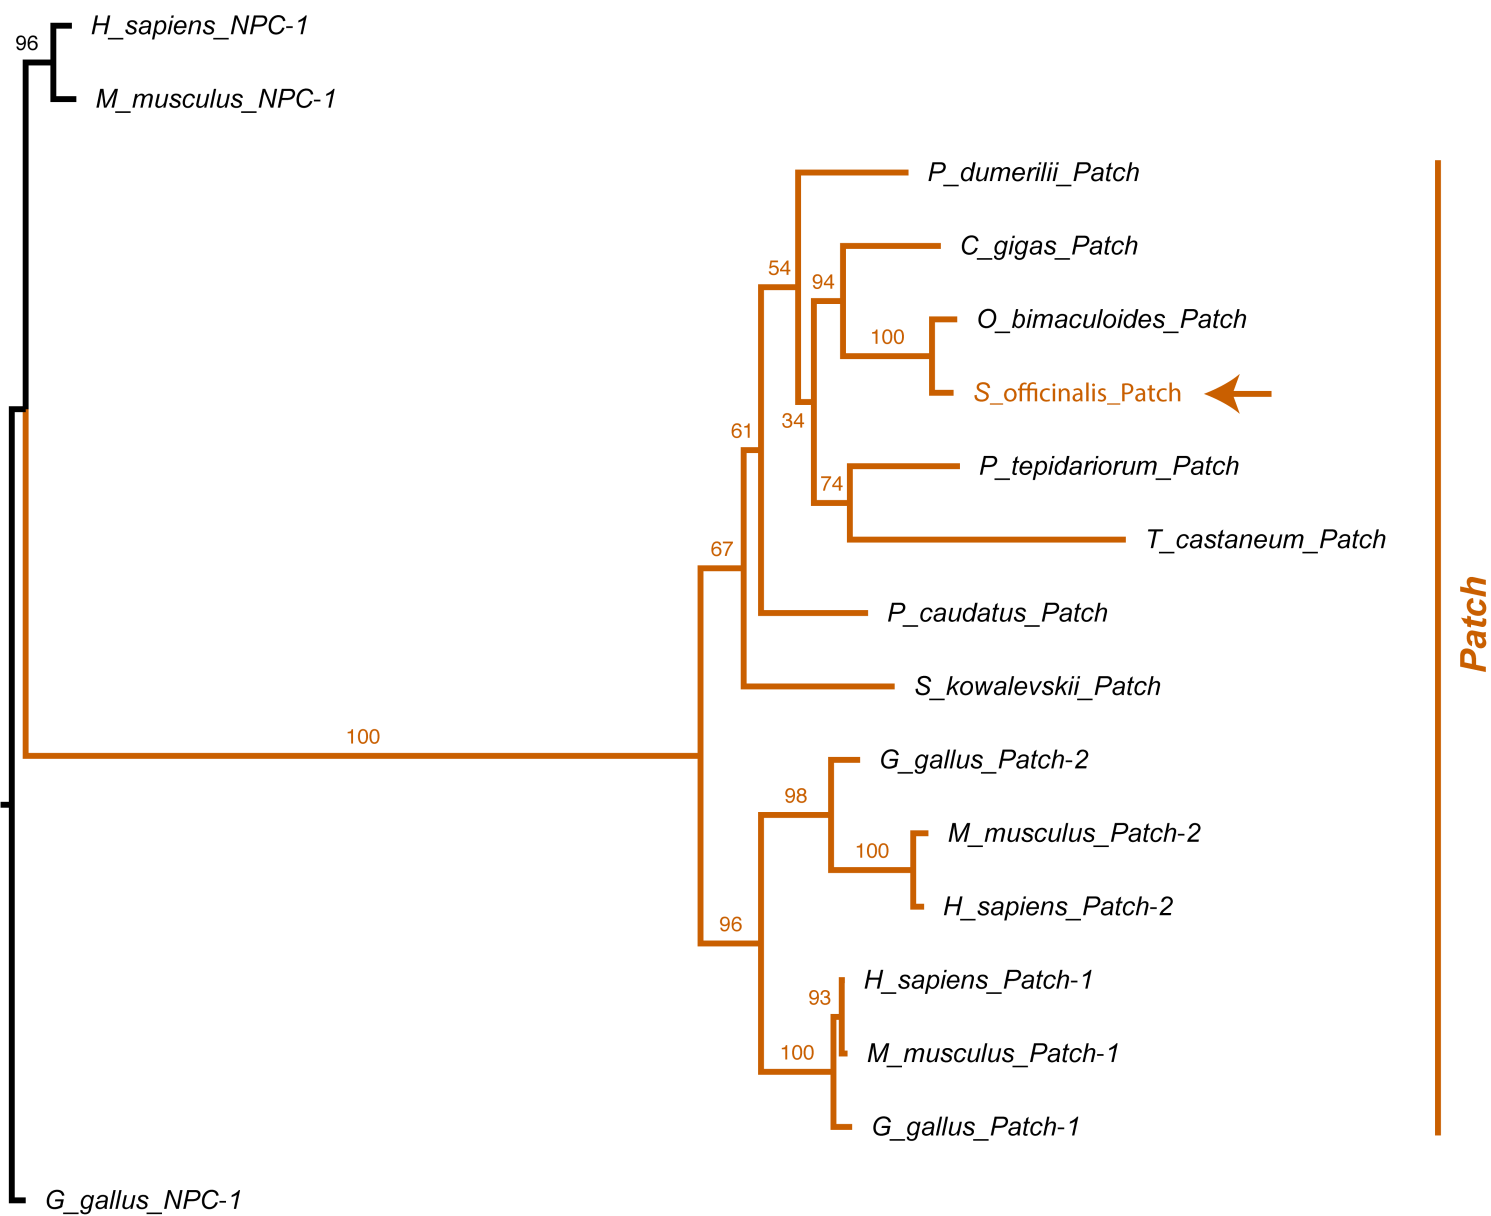

0.5

### **Figure 3 supplements**

**Figure 3 – figure supplement 1. Expression of developmental control genes in cuttlefish limb buds. (A to O)** *In situ* hybridizations showing *Wnt1*, *Wnt5*, *Wnt7*, *Tcf*, *Exd*, *Htx*, *Dll*, *Dac*, *Sp8*, *Hh*, *Ptc*, *Bmp2/4*, *En* and *Sfrp1/2/5* in stage 21 embryos. *Hh* expression in stage 21 limb buds, detected by *in situ* hybridizations in whole mount (F) and cryosections (K) showing the central expression in the brachial nerve cell precursors. **(P to R)** *In situ* hybridizations of *Frz9/10* at stages 17 (P and S), 20 (Q and T) and 21 (R and U). A, anterior; P, posterior; D, dorsal; V, ventral.

**Figure 3 – figure supplement 2. Analysis of gene expression in the arms and tentacles of *Sepia bandensis* embryos.** *S. bandensis* probes that were used on *S. officinalis* embryos were validated by species-specific hybridization using *S. bandensis* embryos. Each probe yielded identical patterns of expression in the limb buds of the two *Sepia* species. **(A-C)** Stage 20 *S. bandensis* limb buds show proximodistally regionalized expression of *Htx*, *Dll* and *Sp8/9a*. The *Htx* domain (A) is proximal to the *Dll* (B) and *Sp8/9a* (C) expression domains. **(D)** *Hh* is restricted to the anterior margin of the limb bud of *S. bandensis*. **(E, F)**, Dorsal expression of *Bmp2/4* (E) and *Sfrp1/2/5* (F) in stage 20 *S. bandensis* limb buds. **(G, H)** *Wnt5* (G) and *Frz9/10* (H) are expressed in the distal but are undetectable in the proximal regions of *S. bandensis* limb buds. **(I, J)** Two-color *in situ* hybridizations show that proximally restricted expression of *Htx* (purple) and distally restricted expression of *Wnt1* (red) are retained during *S. bandensis* limb outgrowth. Stage 21 arm (I) and tentacle (J). D, dorsal; V, ventral; P, posterior; A, anterior. All limb buds oriented as in (A) except for (D), which is oriented according to the axes shown.

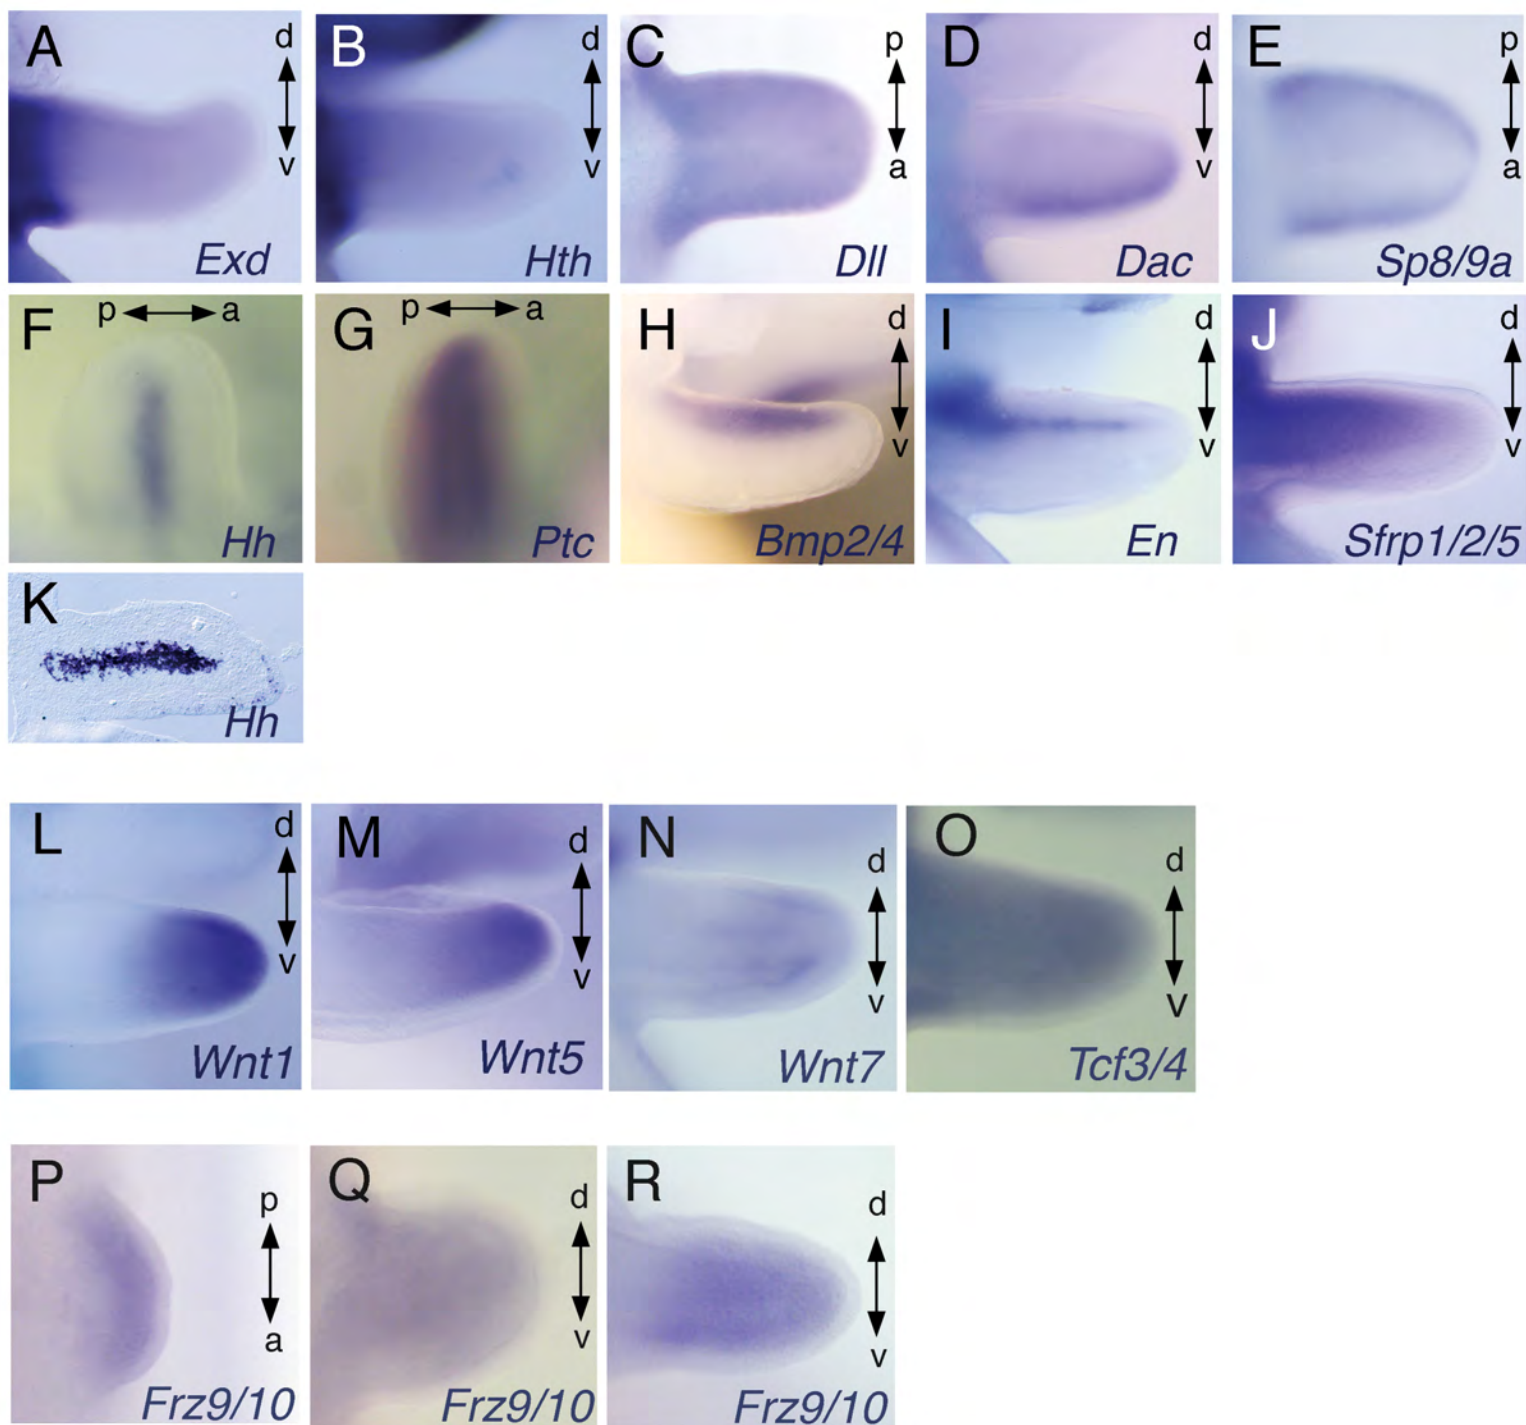

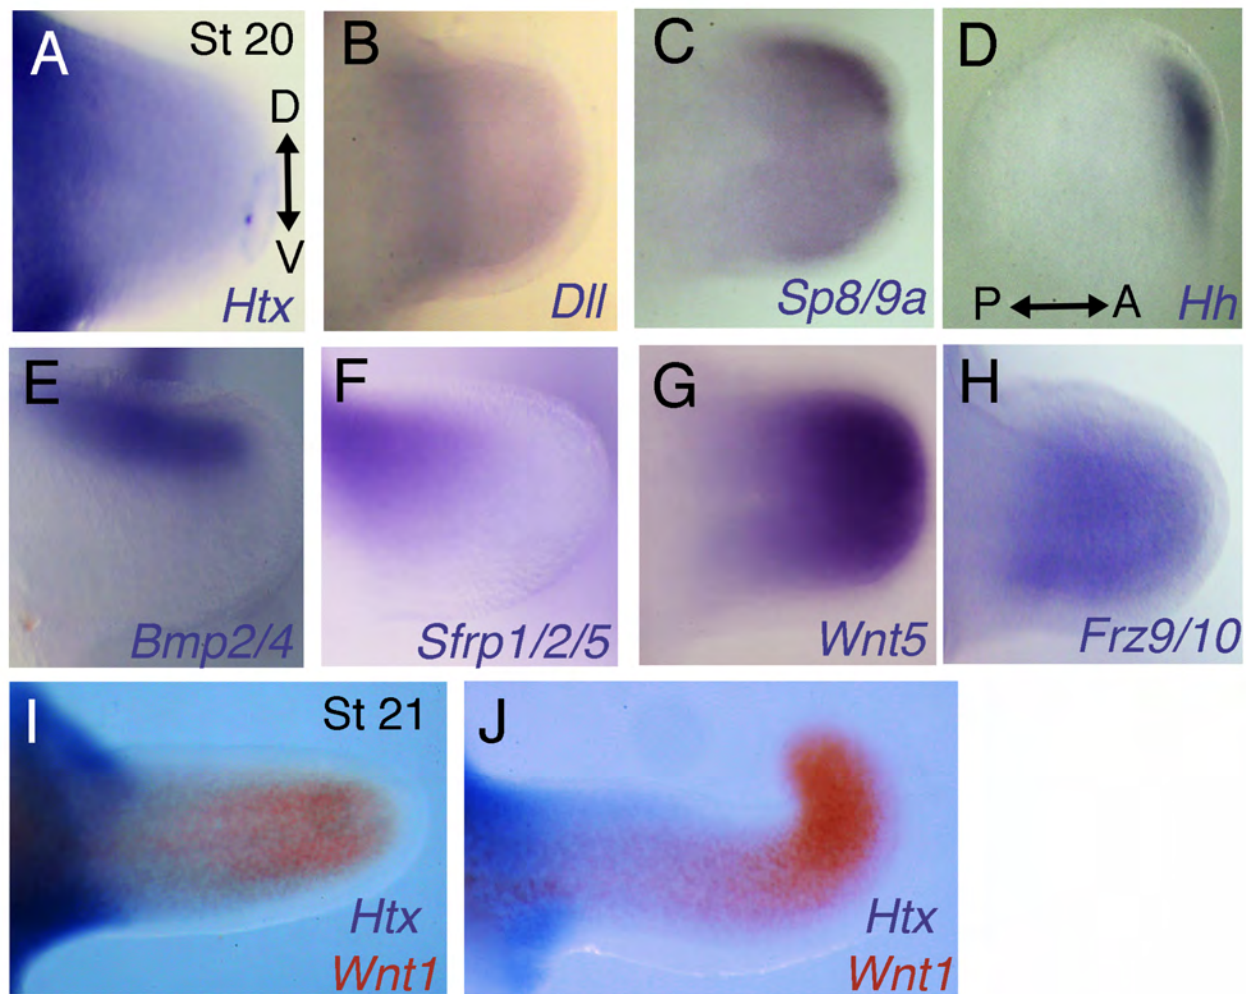

## **Figure 4 supplements**

### **Figure 4 – figure supplement 1. Sucker development after manipulations of Bmp**

**and Hh signaling pathways. (A)** SEM of Noggin-treated limbs shows dorsal ectopic

sucker buds (A) as seen in Fig. 4b. **(B)** Higher magnification of the region inside the yellow square in (A) showing the superficial dome-shape morphology of sucker bud cells.

**(C)** SEM of posterior mirror-image duplicated limb caused by graft of *Hh*-expressing

tissue, as seen in (Fig. 4e). **(D)** Higher magnification of the region inside the yellow

square in (C) shows the superficial dome-shape morphology of sucker bud cells. **(E and**

**F)** Differentiation of brachial nerves in cyclopamine-treated (E) and DMSO control (F)

embryos revealed by acetylated tubulin in the center of the limbs. Scale bars, 100  $\mu$ m.



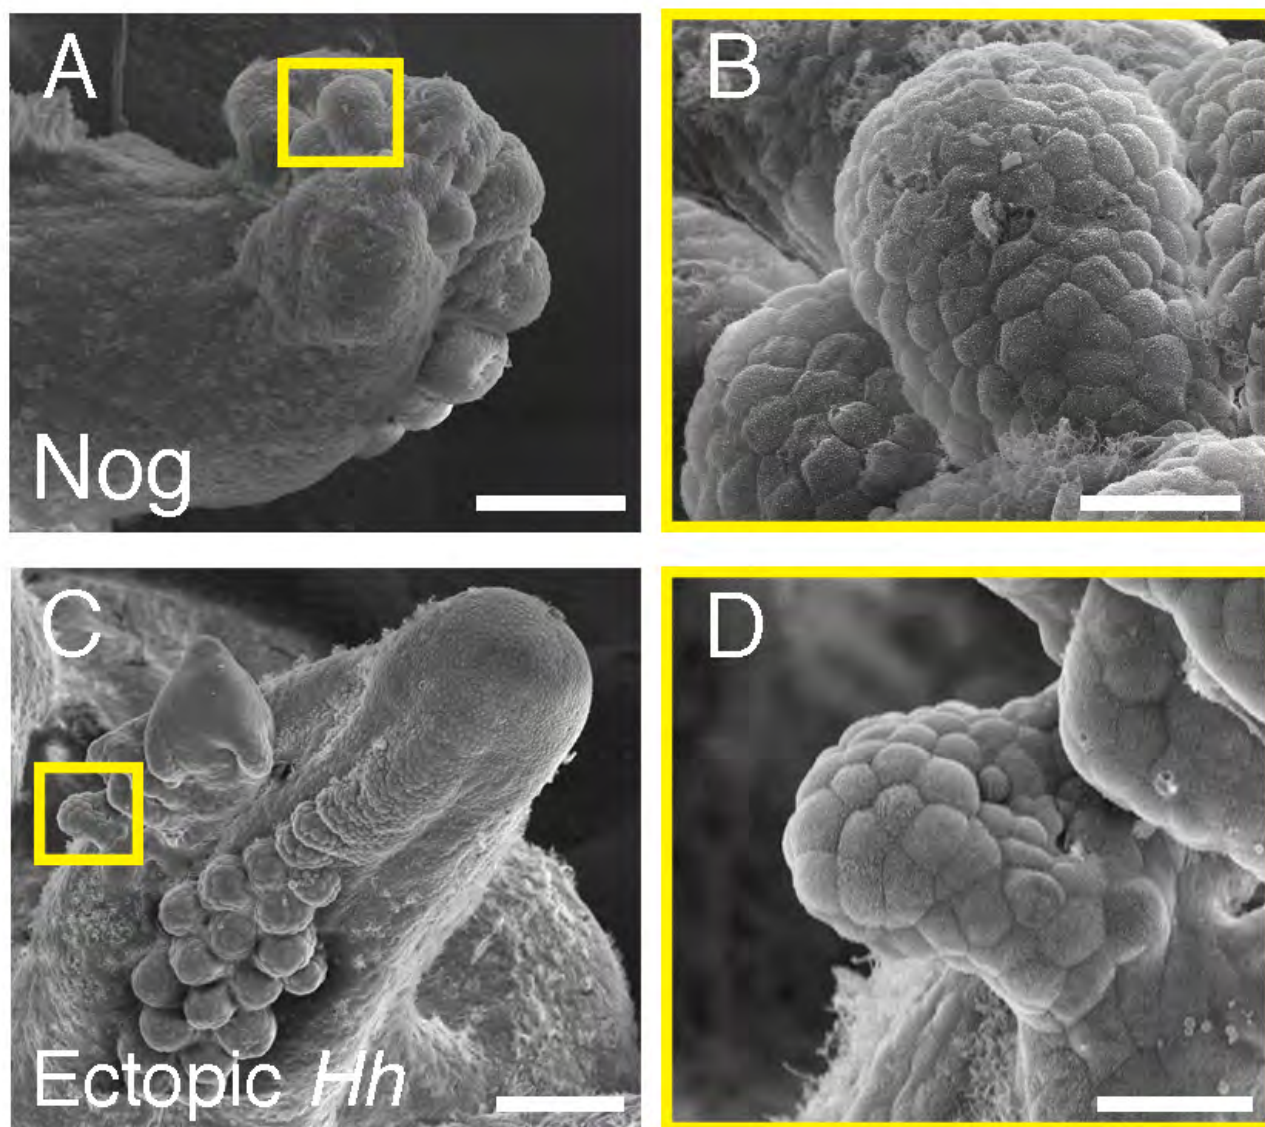

## Brachial nerve differentiation

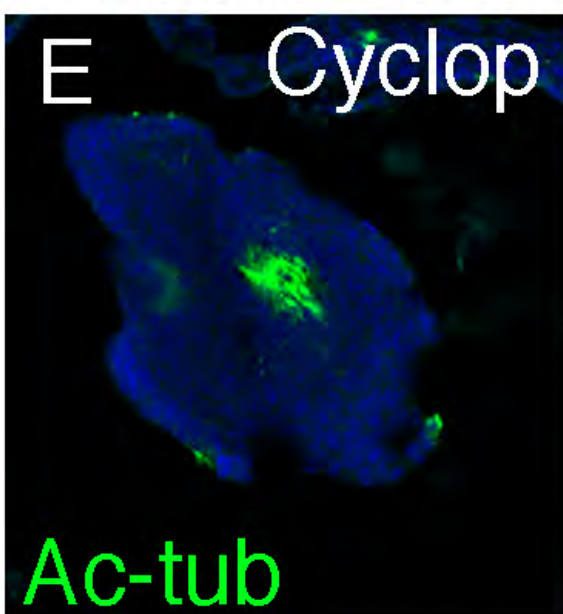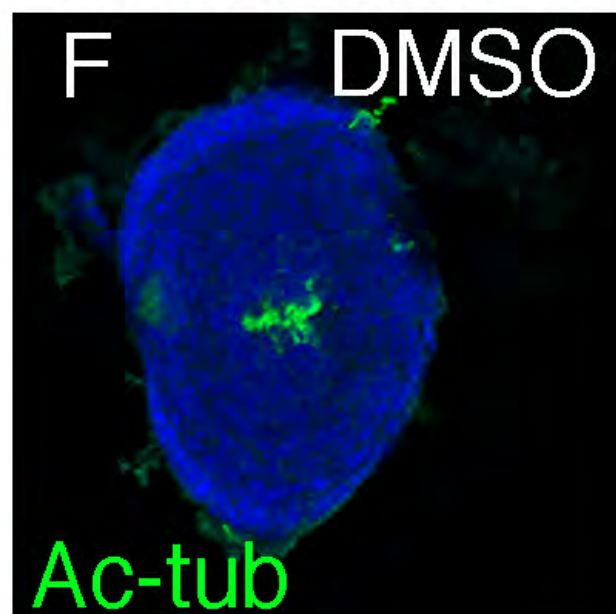

## **Figure 5 supplements**

**Figure 5 – figure supplement 1. The developing funnel/siphon organ shows limb-like expression patterns of the proximodistal patterning genes *Exd* and *Wnt5*.** (A to D) OPT reconstructions of stage 17 to 24 cuttlefish embryos showing the developing funnel/siphon system (pseudocolored red). (A) Funnel development begins at stage 17 with emergence of two bilaterally symmetrical funnel ridges between the row limb buds (bottom) and the gill primordia (GP), which can be seen adjacent to mantle (Mnt). (B) The funnel ridges fuse medially to form the funnel primordium. Yellow box marks area shown in E and F. (C) A single siphon tube then develops at the distal end of the funnel primordium. (D) By stage 24, the funnel/siphon organ has reached a miniature version of its adult shape and form. At this stage, the mantle covers the proximal region of the funnel. To allow the entire funnel/siphon organ to be seen, we segmented out the funnel and digitally removed part of the mantle using Amira Software. (E-H) Whole mount *in situ* hybridizations show polarized expression of *Wnt5* and *Exd* in the distal and proximal regions, respectively, of the developing funnel primordium. OPT reconstructions (E, F) and brightfield microscopy (E, G). *Wnt5* is expressed distally (arrows) at early and late stages of funnel/siphon development. In addition to the distal medial domain of *Wnt5* expression domain at stage 19+ (white arrow in E), two lateral spots of expression can be seen (white arrowheads in E). (F, H) *Exd* is expressed proximally (arrows) at both stages. Asterisks mark expression of *Exd* in the proximal ends of the funnel that are situated beneath the mantle.

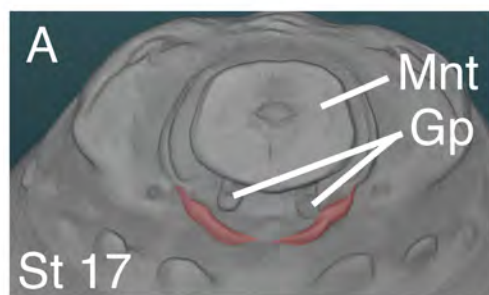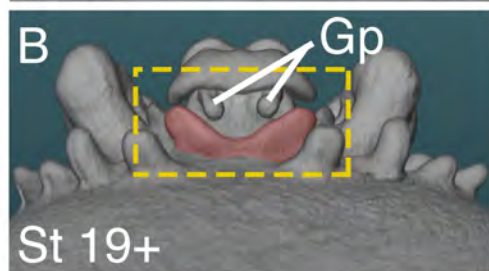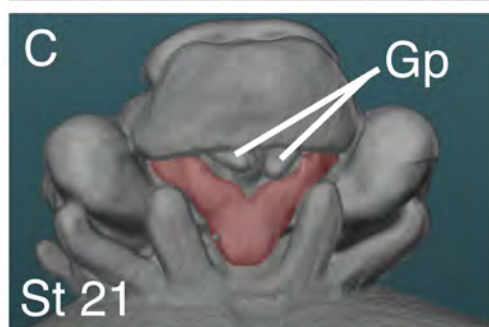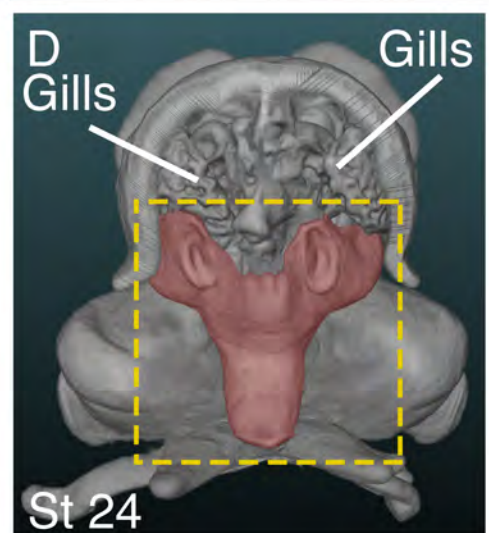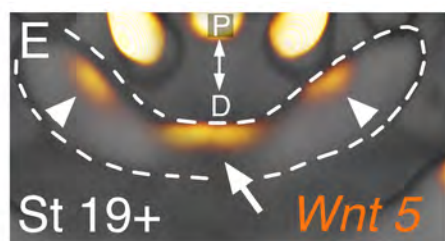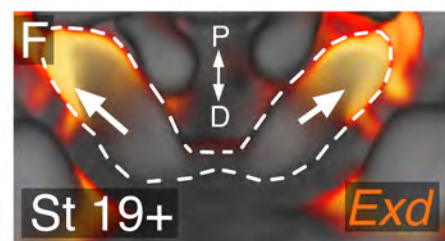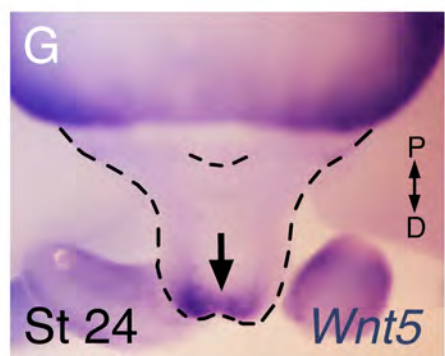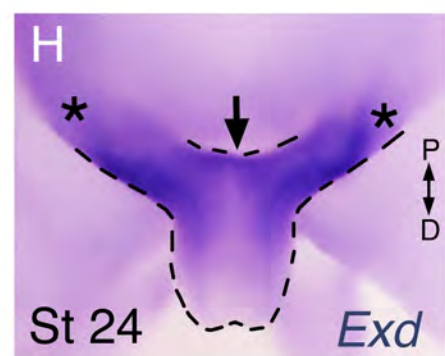

Source: https://www.biorxiv.org/content/10.1101/379735v3.full.pdf
