## **Evolution of limb development in cephalopod mollusks**

Oscar A. Tarazona<sup>1,2</sup>, Davys H. Lopez<sup>1</sup>, Leslie A. Slota<sup>2</sup>, and Martin J. Cohn<sup>1,2,#</sup>

<sup>1</sup>Department of Molecular Genetics and Microbiology, <sup>2</sup>Department of Biology, UF Genetics Institute, University of Florida, Gainesville, FL 32610 USA.

#Corresponding author: [mjcohn@ufl.edu](mailto:mjcohn@ufl.edu)

1     **Abstract**

2           Cephalopod mollusks evolved numerous anatomical innovations, including  
3     specialized arms and tentacles, but little is known about the developmental  
4     mechanisms underlying the evolution of cephalopod limbs. Here we show that all three  
5     axes of cuttlefish limbs are patterned by the same signaling networks that act in  
6     vertebrates and arthropods, although they evolved limbs independently. In cuttlefish  
7     limb buds, *Hedgehog* is expressed anteriorly. Posterior transplantation of *Hedgehog*-  
8     expressing cells induced mirror-image limb duplications. Bmp and Wnt signaling, which  
9     establishes dorsoventral polarity in vertebrate and arthropod limbs, is similarly  
10    polarized in cuttlefish. Inhibition of the dorsal Bmp signal caused ectopic expression of  
11    *Notum*, a ventral sucker field marker, and development of ectopic suckers. Cuttlefish  
12    limbs also show proximodistally regionalized expression of *Htx*, *Exd*, *Dll*, *Dac*, *Sp8*, and  
13    *Wnt* genes, which delineate arm and tentacle sucker fields. These results suggest that  
14    cephalopod limbs evolved by parallel activation of an ancient developmental genetic  
15    program that was present in the bilaterian common ancestor.

16

## 1      **Introduction**

2            Animal appendages have widely varying morphologies and perform a multitude of  
3      functions, including locomotion, feeding, and reproduction (Nielsen, 2012; Ruppert et  
4      al., 2004). Limbs evolved independently on multiple occasions, and many animal  
5      lineages show no evidence of shared ontogenetic or morphological precursors of  
6      appendages (Minelli, 2003; Pueyo & Couso, 2005; Shubin et al., 1997). This has led to  
7      the view that appendages in different clades of Bilateria are non-homologous  
8      morphological innovations that arose by convergent evolution (Nielsen, 2012; Ruppert  
9      et al., 2004). However, despite more than 500 million years of divergence, the  
10     independently evolved limbs of arthropods and vertebrates share developmental  
11     genetic similarities (Pueyo & Couso, 2005; Shubin et al., 1997; Tabin et al., 1999).

12  
13            These discoveries led to debate over whether the genetic program for appendage  
14     development evolved in the common ancestor of all bilaterians in the early Cambrian  
15     (>500 millions of years ago), or whether arthropod and vertebrate appendages have  
16     undergone rampant convergence of developmental programs (Minelli, 2000, 2003;  
17     Panganiban et al., 1997; Pueyo & Couso, 2005; Shubin et al., 1997; Tabin et al.,  
18     1999). A major obstacle to resolving this question is that the evidence of a conserved  
19     program derives almost exclusively from Ecdysozoa and Deuterostomia (Pueyo &  
20     Couso, 2005; Shubin et al., 1997), and little is known about molecular mechanisms of  
21     limb development in Spiralia, the third major superphylum of Bilateria (Prpic, 2008;  
22     Winchell & Jacobs, 2013; Winchell et al., 2010).

23

1           Within spiralian, the phylum Mollusca corresponds to its largest lineage,  
2           displaying a rich diversity of body plans (Figure 1A) dating back to the Cambrian  
3           explosion (Ruppert et al., 2004; Smith et al., 2011). The evolution of arms and  
4           tentacles in cephalopod mollusks contributed to the successful adaptive radiation of  
5           these agile marine predators (Kroger et al., 2011; Ruppert et al., 2004). Cephalopod  
6           limbs are highly muscular appendages that bear cup-shaped suckers on their ventral  
7           sides. Whereas arms are short with suckers along the entire ventral surface (Figure  
8           1B,C), tentacles are longer retractable appendages with suckers restricted to a distal  
9           pad (Figure 1D,E). Tentacles are thought to be specialized serial homologs of the arms  
10          (Arnold, 1965; Lemaire, 1970; Shigeno et al., 2008) and are present in decapods  
11          (squid and cuttlefish) but absent in nautilids and octopods. Limbs likely evolved *de*  
12          *novo* in cephalopods (Figure 1A), since no homologous precursor structures have been  
13          identified in any other mollusk lineages (Lee et al., 2003; Shigeno et al., 2008). To test  
14          the hypothesis that cephalopod limbs evolved by recruitment of an ancient gene  
15          regulatory network for appendage development that is conserved across Bilateria, we  
16          investigated arm and tentacle development in embryos of the cuttlefish, *Sepia*  
17          *officinalis*.

18

## 19          **Results and Discussion**

20          Cuttlefishes are decapod cephalopods that bear eight arms and two tentacles  
21          (Figure 1B-E). Fertilized cuttlefish eggs display superficial cleavage, and scanning  
22          electron microscopy and optical projection tomography show that most embryonic  
23          development is restricted to the animal pole (Figure 1H,I). The first sign of limb

1 formation is observed at stage 16, when all ten limb primordia (5 on each side) can be  
2 detected as small swellings around the periphery of a flat-shaped embryo, which lies at  
3 the top of the large yolk mass (Figure 1H,M). Analysis of the mitotic marker phospho-  
4 histone H3 (PHH3) at stage 15 revealed localized clusters of PHH3-positive cells in  
5 each of the early limb primordia (Figure 1F,G), indicating that initiation of limb  
6 outgrowth is caused by localized cell proliferation. Discrete limb buds are observed  
7 from stage 17 (Figure 1I,N) and, as the embryo begins to rise-up on the animal pole  
8 around stage 19, the limb buds start to elongate along the proximodistal axis (Figure  
9 1J,O).

10  
11 Analysis of sucker development showed that a sucker field primordium initially  
12 forms as a narrow proximodistal ridge along the ventral surface of each limb by stage  
13 21 (Figure 1P). At later stages, the sucker field ridge cleaves superficially, segregating  
14 sucker buds from proximal to distal (Figure 1Q). As the arms elongate, the sucker buds  
15 are laid down on the entire ventral surface of each arm (Figure 1L,R; Figure S1A,C-G),  
16 forming four parallel rows across the anteroposterior axis (Figure 1C and Figure S1A).  
17 In the tentacles, the primordial sucker band is restricted to the distal tip, where sucker  
18 buds form in eight rows along the anteroposterior axis of the tentacle sucker pads  
19 (Figure 1D and Figure S1B). The full complement of immature sucker bud rows is  
20 present on each limb at hatching, and differentiation of the suckers continues during  
21 post-hatch development (Figure S1H, I).

22

1           To determine whether conserved mechanisms are involved in development of  
2 cuttlefish limbs, despite their independent evolutionary origin, we first cloned and  
3 analyzed the expression of cuttlefish orthologs of genes that pattern the  
4 anteroposterior, dorsoventral, and proximodistal axes of arthropod and vertebrate  
5 limbs. In cuttlefish embryos from stages 16 to 21, genes that pattern the proximodistal  
6 axis of arthropod and vertebrate limbs (Lecuit & Cohen, 1997; Mercader et al., 1999;  
7 Panganiban et al., 1997; Pueyo & Couso, 2005) showed polarized expression domains  
8 along the proximodistal axis of the limb buds, with *Exd* and *Htx* restricted proximally  
9 (Figure 2B,F,G; Figure 3A-E; and Figure S2A,B) and *Dll*, *Dac*, *Sp8*, *Wnt1*, *Wnt5*, and  
10 *Wnt7* restricted distally (Figure 2C,H-J; Figure 3F-I; Figure S2C-E,L-O). At stages 20-  
11 21, the distal expression boundary of *Exd* and *Htx* and the proximal boundary of *Dll*  
12 and *Sp8* expression delineate the morphological boundary between the proximal  
13 sucker-free and the distal sucker-forming regions (compare right panels in Figure 2F-  
14 H,J with Figure 1P). Indeed, when arms and tentacles begin to develop their distinctive  
15 morphologies -- tentacles are longer and have an extensive proximal sucker-free  
16 domain -- the *Exd/Htx* expression domains extend further distally in tentacles (Figure  
17 3B,D) compared to arms (Figure 3A,C). Extension of the distal boundary of *Exd/Htx*  
18 expression in tentacles matches the expanded sucker-free domain and the distal  
19 restriction of suckers in tentacles (Figure 3E).

20  
21           Our finding that cuttlefish limbs share molecular regionalization of the proximodistal  
22 axis with arthropods and vertebrates led us to examine whether anteroposterior and  
23 dorsoventral axis development also shows molecular conservation. Posteriorly

1 polarized activation of Hedgehog signaling in arthropod and vertebrate limbs is  
2 essential for proper patterning of the anteroposterior axis, and ectopic activation of the  
3 Hedgehog pathway induces anterior duplication of posterior structures (Basler & Struhl,  
4 1994; Kojima et al., 1994; Riddle et al., 1993). We analyzed *Hh* expression during  
5 cuttlefish limb development at stages 16 to 20 and found that *Hh* expression is also  
6 polarized to one side of cuttlefish limb buds. In cuttlefishes, however, *Hh* expression is  
7 restricted to the anterior margin of the limb bud, whereas in arthropods and  
8 vertebrates, *Hh/Shh* is expressed posteriorly (Figure 2D,K). Consistent with the  
9 anterior localization of *Hh*, we detected expression of *Patched*, which serves as a  
10 readout of Hedgehog signal transduction, in an anterior-to-posterior gradient (Figure  
11 2L). Thus, anteroposteriorly restricted activation of the Hedgehog pathway is a  
12 conserved feature of cephalopod, arthropod, and vertebrate limb development, but the  
13 polarity of the signaling center is reversed in cephalopod limbs. By stage 21, the  
14 anteriorly restricted *Hh* domain has diminished and a new, central expression domain  
15 appears in the location of the brachial nerve primordia (Figure S2F,K).

16  
17 We then examined the dorsoventral axis, which is controlled by the antagonistic  
18 actions of *wg/Wnt* and *dpp/Bmp* signaling in arthropods and vertebrates (Brook &  
19 Cohen, 1996; Cygan et al., 1997; Diaz-Benjumea et al., 1994; Jiang & Struhl, 1996;  
20 Parr & McMahon, 1995). In arthropods, the Wnt ligand *wg* is expressed ventrally,  
21 whereas the Bmp2/4 ortholog *dpp* is expressed dorsally (Basler & Struhl, 1994; Diaz-  
22 Benjumea et al., 1994). Expression and function of the Wnt-Bmp network is conserved,  
23 albeit with inverted polarity, in vertebrate limbs; *Wnt7a* is expressed dorsally (Parr &

1       McMahon, 1995) and Bmp signaling activates *Engrailed1* (*En1*) ventrally (Ahn et al.,  
2       2001), and these interactions regulate development of dorsal and ventral limb  
3       structures (Cygan et al., 1997; Parr & McMahon, 1995). During cuttlefish limb  
4       development, *Bmp2/4* and *En* show dorsally polarized expression (Fig 2E,M,N). Genes  
5       encoding Wnt ligands (*Wnt1*, *Wnt5* and *Wnt7*) and cellular components of canonical  
6       Wnt signaling cascade (*Tcf*, *Lrp* and *Frz*) are expressed broadly throughout cuttlefish  
7       limb buds (Figure 3F-I and Figure S2L-U); however, the secreted Wnt antagonists  
8       *Notum* and *Sfrp* are expressed dorsally in the limb and interlimb regions (Figure 3J-M),  
9       with the *Sfrp* domain extending deeper into the dorsal limb buds (Figure 2O; Figure  
10      3M). This dorsal expression of Wnt antagonists suggests a mechanism for restriction of  
11      Wnt signaling to the ventral side of the cephalopod limb buds. Taken together, these  
12      results suggest that the genetic pathways active along the proximodistal,  
13      anteroposterior, and dorsoventral axes of cephalopod limbs are homologous to the  
14      networks that regulate limb development in arthropods and vertebrates.

15  
16           In order to further test this hypothesis, functional experiments were performed to  
17      determine whether polarized expression of these signaling molecules is involved in  
18      patterning the anteroposterior and dorsoventral axes of cuttlefish limbs. To ectopically  
19      activate or repress genetic pathways in early limb buds, we developed a method for *ex-*  
20      *ovo* culture of cuttlefish embryos (see Material and Methods) to allow *in vivo*  
21      manipulations.

22



1           We asked whether polarized expression of *Bmp2/4* on the dorsal side of cuttlefish  
2 limb buds is required for the specification of dorsal identity. To repress dorsal Bmp  
3 activity, we implanted carrier beads loaded with Noggin (Nog), a secreted Bmp inhibitor  
4 protein, on the dorsal side of stage 17 limb buds (Figure 4A). A hallmark of  
5 dorsoventral polarity is the restriction of sucker buds to the ventral surface of the limb  
6 (Figure 1C,D,S), and this is preceded by ventral expression of *Notum* in the sucker-  
7 forming region at stage 21 (Figure 3N-Q). Implantation of Nog beads to the dorsal side  
8 of cuttlefish limb buds resulted in ectopic dorsal expansion of the *Notum* mRNA domain  
9 (n=3/3; control PBS [phosphate buffered saline] beads had no effect on *Notum*  
10 expression [n=3/3]) (Figure 4G,H). To determine whether inhibition of dorsal Bmp  
11 signaling respecifies dorsal cells to form ventral structures, we repeated the experiment  
12 and allowed embryos to develop to stage 26-27. Analysis of limb morphology by  
13 scanning electron microscopy revealed the presence of ectopic sucker buds on the  
14 dorsal surface of Nog-treated limbs (n=8/12; Figure 4B and Figure S3A,B). The ectopic  
15 dorsal suckers extended around the distal tip of the limb and joined the ventral sucker  
16 field. By contrast, in limbs that received control PBS beads dorsally, sucker buds were  
17 restricted to ventral surface and terminated at the normal dorsal-ventral boundary at  
18 the tip of the limb (n=15/15; Figure 4C). Our finding that antagonism of Bmp signaling  
19 results in development of ventral structures (sucker buds) on the dorsal side of the limb  
20 indicates that dorsal *Bmp2/4* activity is required for the early specification of dorsal  
21 identity in cephalopod limb development.

22

1           We then investigated whether the mechanism of anteroposterior patterning is  
2 conserved between cephalopod and vertebrate/arthropod limbs. To determine whether  
3 the anterior expression of *Hh* in cuttlefish limb buds controls anteroposterior patterning,  
4 we grafted *Hh*-expressing cells from the thickened funnel epithelium (Tarazona et al.,  
5 2016) to the posterior side of stage 17 limb buds, which created an ectopic source of  
6 *Hh* opposite the endogenous *Hh* expression domain (Figure 4D). We used *Hh*-  
7 expressing cells from the funnel, rather than the anterior side of the limb bud, to  
8 exclude the possibility of grafted limb cells undergoing self-differentiation. Around ten  
9 days after receiving the graft, host limbs developed a mirror-image limb duplication  
10 posteriorly (n=7/12; Figure 4E and Figure S3C,D). Analysis of morphology and gene  
11 expression revealed that the posterior duplication even contained sucker buds, marked  
12 by *Notum* expression (Figure 4I,J). By contrast, limbs that received control grafts of  
13 stage 24 funnel epithelium that lacks *Hh* expression (Tarazona et al., 2016) developed  
14 normally (n=8/8; Figure 4F).

15  
16           Although these results suggest that *Hh* is sufficient to respecify anteroposterior  
17 polarity in cuttlefish limbs, we wanted to exclude the possibility that posterior identity  
18 was induced by other factors that could be present in the graft. Therefore, we tested  
19 whether *Hh* signaling is necessary for anteroposterior patterning of cephalopod limbs  
20 by specifically repressing endogenous *Hh* signaling. A notable morphological feature of  
21 cephalopod limbs is the anteroposterior arrangement of parallel sucker rows on the  
22 ventral surface (Figure 1C,D,S). We reasoned that *Hh* signaling could regulate the  
23 number of sucker rows along the anteroposterior axis of cephalopod limbs similar to

1 the manner in which Hh specifies digit number along the anteroposterior axis of  
2 vertebrate limbs (Lewis et al., 2001; Scherz et al., 2007; Zhu et al., 2008). Transitory  
3 treatment (2 days) of cuttlefish embryos at stage 16, when *Hh* is first expressed on the  
4 anterior side of the early limb bud, with the small molecule cyclopamine, an inhibitor of  
5 Smoothed that represses Hh signaling (Figure 4K), disrupted the anteroposterior  
6 distribution of sucker rows in arms and tentacles. Severity of this phenotype ranged  
7 from arms with a reduced number of suckers and sucker rows (n=10/10; Figure 4N,O)  
8 to completely sucker-free tentacles (n=8/10; Figs. 4L). Control treatments with vehicle  
9 only (DMSO) did not alter the normal anteroposterior pattern of sucker rows (n=8/8;  
10 Figure 4M,P). Finally, to confirm that the phenotype of cyclopamine-treated embryos  
11 was not due to failure in brachial nerve differentiation, we examined acetylated tubulin  
12 immunofluorescence, which shows that the brachial nerve cords develop in both  
13 cyclopamine and DMSO treated embryos (Figure S3E,F). These results show that Hh  
14 signaling is necessary for proper patterning of the anteroposterior axis in cephalopod  
15 limb development.

16  
17 Our finding that the proximodistal, dorsoventral, and anteroposterior axes of  
18 cuttlefish limb buds are patterned by the same pathways that regulate arthropod and  
19 vertebrate limb development suggests that the independent evolution of limbs in  
20 cephalopod mollusks involved recruitment of an ancient genetic program for  
21 appendage development. Discovery of this appendage developmental circuit within  
22 Spiralia demonstrates its deep conservation across all three branches of Bilateria (i.e.,  
23 Deuterostomia, Ecdysozoa, and Spiralia), suggesting its presence in the common

1 ancestor of all bilaterians. Parallel recruitment of this ancient developmental genetic  
2 program may have played a role in the independent evolution of a wide diversity of  
3 appendages in many bilaterian lineages (Moczek & Nagy, 2005; Shubin et al., 2009).

4  
5       Whereas conservation of this ancient developmental program was probably central  
6 to the origin of cephalopod limbs, our data also suggest that fine-scale regulatory  
7 changes may have played a role in the diversification of cephalopod limb  
8 morphologies. We hypothesize that evolution of tentacles from serially homologous  
9 arms was probably caused by distally expanded expression of proximal identity genes,  
10 such as *Exd* and *Htx*, producing an extensive proximal sucker-free domain and  
11 restricting suckers to a distal pad. Likewise, the diversity in sucker row number along  
12 the anteroposterior axis displayed by different cephalopod lineages (i.e. four rows in  
13 squids and cuttlefishes, two in octopus and one in vampire squid and glass octopus)  
14 could be explained by modulation of Hh signaling, in the same way that gradual  
15 changes to *Shh* regulation has led to variation in digit number in tetrapod vertebrates  
16 (Scherz et al., 2007; Shapiro et al., 2003; Zhu et al., 2008). While the data presented  
17 here point to the existence of a deeply homologous genetic program for appendage  
18 development across *Bilateria*, this does not imply that the limbs of cephalopods,  
19 arthropods, and vertebrates are homologous structures or that limbs were present in  
20 the common ancestor. Rather, these results show that homologous developmental  
21 mechanisms underlie the multiple origins of bilaterian limbs.

22

## 1 **Materials and Methods**

2  
3 No statistical methods were used to predetermine sample size. Embryos were  
4 randomized in each experiment. The investigators were not blinded to allocation during  
5 experiments and outcome assessment.

### 6 7 **Embryo collection and preparation**

8 *Sepia officinalis* eggs were purchased from commercial suppliers, incubated until they  
9 reached the required stages (Lemaire, 1970), and prepared for *in situ* hybridization  
10 (ISH) and immunohistochemistry as described (Tarazona et al., 2016).

### 11 12 **Optical projection tomography (OPT)**

13 Three-dimensional reconstructions of gene expression in cuttlefish embryos were  
14 performed as previously described (Tarazona et al., 2016).

### 15 16 **Scanning electron microscopy**

17 Cuttlefish embryos were fixed in 4% paraformaldehyde in phosphate buffered saline  
18 (PBS) overnight at 4°C and were washed with PBS the next day. Embryos were fixed  
19 in 1% osmium tetroxide solution in PBS for 30 minutes and then washed three times in  
20 PBS, dehydrated through a graded ethanol series, critical point dried, and sputter  
21 coated with gold. Embryonic samples were scanned using a Hitachi SU5000 and  
22 Hitachi TM3000.

### 23 24 **Gene cloning, *in situ* hybridization (ISH) and immunohistochemistry**

25 RNA extraction from *Sepia* embryos at stages 15–26 was performed using TRIzol  
26 reagent (Ambion) following the manufacturer's instructions. cDNA synthesis was  
27 performed by an AMV reverse transcriptase (New England Biolabs) following the  
28 manufacturer's instructions.

29  
30 Whole-mount ISH was performed using digoxigenin and fluorescein labeled antisense  
31 (or sense control) RNA probes according to protocols previously described (Tarazona

1 et al., 2016). Proliferating cells were detected by immunolocalization of Histone H3  
2 Serine 10 phosphorylation using an antibody against H3S10p/PHH3 (06-570, EMD  
3 Millipore) and brachial nerve tissue was detected using an antibody against acetylated  
4 alpha tubulin (ab24610, Abcam).

### 6 **Cuttlefish ex-ovo embryo culture and embryo manipulations**

7 A protocol for ex-ovo cuttlefish embryo culture was established for this study, as a  
8 modified version of previous descriptions of ex-ovo embryo culture in squid (Arnold,  
9 1990). Briefly, to minimize the problem of bacterial and fungal contamination we started  
10 the protocol by taking 10 cuttlefish eggs at the appropriate stage, placing them in a  
11 50ml tube, and washing them with 0.22 µm filtered artificial sea water (FASW) five  
12 times. Eggs were then cleaned with a freshly prepared 5% bleach solution (0.25%  
13 sodium hypochlorite in FASW) for 5 seconds and immediately washed with FASW five  
14 times. The bleaching and washing steps were repeated two to three times. Five  
15 additional washes with FASW were carried out before incubating the eggs in 2X  
16 antibiotic/antimycotic solution (A5955, Sigma) in FASW for 2 hours at ambient  
17 temperature.

18  
19 Each cuttlefish egg was then transferred to a 50 mm diameter petri dish that was  
20 coated with a ~ 5mm layer of 0.5% low melting point agarose (16520050,  
21 ThermoFisher), and filled with culture medium (components described below). The  
22 agarose layer had a hemispherical depression in the center of the dish made with a  
23 sterile 10 mm acrylic necklace bead before gel solidification. The 10mm hemispherical  
24 depression is essential to maintain the normal shape of the yolk mass once the  
25 embryos are outside their egg case. Embryos were then extracted from their egg cases  
26 (*S. officinalis* are housed individually, one embryo per egg case) very slowly and with  
27 extreme care to avoid rupturing the yolk mass at the vegetal pole of the egg and were  
28 carefully placed in the hemispherical depression in the agarose. To extract the embryo,  
29 a single 5mm diameter hole was created in the egg case, which generates a burst of  
30 the vitelline liquid and part of the embryo out from the egg case. With the hole kept  
31 open, the spontaneous shrinkage of the egg case aided in the expelling of the large

1 cuttlefish embryo. Of every ten eggs prepared this way, between two and five embryos  
2 were damaged and had to be discarded. Embryos were cultured at 17°C.

3

#### 4 **Protein carrier beads and tissue grafting**

5 For protein carrier bead implantation, 150µm diameter Affi-Gel Blue Gel beads (153-  
6 7301, Biorad) were selected and transferred to 1mg/ml recombinant human Noggin  
7 protein (6057-NG, R&D Systems) in PBS and incubated for 30 minutes to 1 hour at  
8 ambient temperature before being implanted in embryos. Control beads were  
9 incubated in PBS only.

10

11 Grafts with *Hh*-expressing tissue were performed by taking stage 24 donor embryos  
12 and carefully dissecting the funnel side of the mantle-funnel locking system, which  
13 carries the *Hh*-expressing thickened funnel epithelium (Tarazona et al., 2016). The  
14 dissected tissue was transferred to 10 mg/ml Dispase II (D4693, Sigma) in cuttlefish  
15 culture medium and incubated for 40 minutes or until the thickened epithelium was  
16 easily detaching from the underlying mesenchyme with the aid of forceps. Tissue was  
17 then transferred to cuttlefish culture medium without Dispase II until they were grafted  
18 into limb buds of stage 17 host embryos. Control grafts were performed using the non-  
19 *Hh* expressing epithelium of the funnel.

20

21 After bead implantation or tissue grafts, embryos were incubated at 17°C until control  
22 embryos reached stage 26, at which point all embryos were collected and prepared for  
23 SEM or ISH.

24

#### 25 **Cuttlefish culture medium**

26 We used a modified version of a cell culture medium for squid neuron, glia and muscle  
27 cells that was previously described (Rice et al., 1990). Cuttlefish culture medium had  
28 no glucose, was buffered with 20mM HEPES and adjusted the pH to 7.6. The medium  
29 contained: 430 mM NaCl, 10 mM KCl, 10 mM CaCl<sub>2</sub>, 50 mM MgCl<sub>2</sub>, 1X MEM Non-  
30 Essential Amino Acids Solution (11140-076, Life Technologies), 1X MEM Amino Acids  
31 Solution (11130-051, Life Technologies), 1X MEM Vitamin Solution (11120-052, Life

1 Technologies), 2 mM L-Glutamine (25030-081, Life Technologies). The medium was  
2 supplemented with 20% heat inactivated fetal bovine serum (16000044, ThermoFisher)  
3 and 1X antibiotic/antimycotic solution (A5955, Sigma).

4

#### 5 **Treatments with small-molecule inhibitors**

6 Cyclopamine treatments were performed as described previously (Tarazona et al.,  
7 2016) with the following modifications; stage 16 embryos were treated with 10  $\mu$ M  
8 cyclopamine (C988400, Toronto Research Chemicals) for 2 days, then washed  
9 thoroughly ten times with FASW. Embryos were then washed 5 more times every hour  
10 and one time every day before collecting the embryos for SEM. Control embryos were  
11 treated with 0.1% DMSO and then washed as described above.

12

13

#### 14 **Acknowledgments**

15

16 We thank Emily Merton for technical support, Karen L. Kelley and Kimberly L. Backer-  
17 Kelley (UF ICBR) for assistance with electron microscopy, and members of our  
18 laboratory for helpful comments and discussions. O.A.T. was supported by a Howard  
19 Hughes Medical Institute International Student Research Fellowship, D.H.L. by a  
20 Society for Developmental Biology “Choose Development!” fellowship, and L.A.S. by  
21 an EDEN Undergraduate Internship.

22

#### 23 **Funding**

24

25 This project was supported by an award from the Howard Hughes Medical Institute (to  
26 M.J.C).



1  
2  
3  
4  
5  
6  
7  
8  
9  
10  
11  
12  
13  
14  
15  
16  
17  
18  
19

## **Competing Interests**

The authors declare no competing or financial interests.

## **Author Contributions**

O.A.T. and M.J.C. designed the experiments, analyzed the data and wrote the paper. All authors collaborated in reviewing and editing the paper. O.A.T., D.H.L. and L.A.S. cloned the *Sepia* genes and analyzed gene and protein expression. O.A.T. performed the scanning electron microscopy, optical projection tomography scanning, three-dimensional reconstructions, *ex-ovo* embryo culture, bead implantation, tissue grafting, and small-molecule treatments.

## **Supplementary Materials**

Figures S1 to S3

Movies S1 to S5

## References

- 1  
2  
3 Ahn, K., Mishina, Y., Hanks, M. C., Behringer, R. R., & Crenshaw, E. B., 3rd. (2001). BMPR-IA  
4 signaling is required for the formation of the apical ectodermal ridge and dorsal-ventral  
5 patterning of the limb. *Development*, 128(22), 4449-4461.
- 6 Arnold, J. M. (1965). Normal Embryonic Stages of the Squid, *Loligo pealii* (Lesueur). *Biological*  
7 *Bulletin*, 128(1), 24-32.
- 8 Arnold, J. M. (1990). Embryonic Development of the Squid. In W. J. Adelman, J.M. Arnold, &  
9 D.L. Gilbert (Eds.), *Squid as Experimental Animals*: Springer US.
- 10 Basler, K., & Struhl, G. (1994). Compartment boundaries and the control of Drosophila limb  
11 pattern by hedgehog protein. *Nature*, 368(6468), 208-214.
- 12 Brook, W. J., & Cohen, S. M. (1996). Antagonistic interactions between wingless and  
13 decapentaplegic responsible for dorsal-ventral pattern in the Drosophila Leg. *Science*,  
14 273(5280), 1373-1377.
- 15 Cygan, J.A., Johnson, R.L., & McMahon, A.P. (1997). Novel regulatory interactions revealed by  
16 studies of murine limb pattern in Wnt-7a and En-1 mutants. *Development*, 124(24), 5021-  
17 5032.
- 18 Diaz-Benjumea, F. J., Cohen, B., & Cohen, S. M. (1994). Cell interaction between  
19 compartments establishes the proximal-distal axis of Drosophila legs. *Nature*, 372(6502),  
20 175-179.
- 21 Jiang, J., & Struhl, G. (1996). Complementary and Mutually Exclusive Activities of  
22 Decapentaplegic and Wingless Organize Axial Patterning during Drosophila Leg  
23 Development. *Cell*, 86(3), 401-409.
- 24 Kojima, T., Michiue, T., Orihara, M., & Saigo, K. (1994). Induction of a mirror-image duplication  
25 of anterior wing structures by localized hedgehog expression in the anterior compartment of  
26 Drosophila melanogaster wing imaginal discs. *Gene*, 148(2), 211-217.
- 27 Kroger, B., Vinther, J., & Fuchs, D. (2011). Cephalopod origin and evolution: A congruent  
28 picture emerging from fossils, development and molecules. *Bioessays*, 33(8), 602-613.
- 29 Lecuit, T., & Cohen, S. M. (1997). Proximal-distal axis formation in the Drosophila leg. *Nature*,  
30 388(6638), 139-145.
- 31 Lee, P. N., Callaerts, P., de Couet, H. G., & Martindale, M. Q. (2003). Cephalopod Hox genes  
32 and the origin of morphological novelties. *Nature*, 424(6952), 1061-1065.
- 33 Lemaire, J. . (1970). Table de developpement embryonnaire de *Sepia officinalis*. L. (Mollusque  
34 Cephalopode). *Bull Soc Zool France*(95), 95:773–782. .
- 35 Lewis, P. M., Dunn, M. P., McMahon, J. A., Logan, M., Martin, J. F., St-Jacques, B., &  
36 McMahon, A. P. (2001). Cholesterol modification of sonic hedgehog is required for long-  
37 range signaling activity and effective modulation of signaling by Ptc1. *Cell*, 105(5), 599-612.
- 38 Mercader, N., Leonardo, E., Azpiazu, N., Serrano, A., Morata, G., Martinez-A, C., & Torres, M.  
39 (1999). Conserved regulation of proximodistal limb axis development by Meis1/Hth. *Nature*,  
40 402(6760), 425-429.
- 41 Minelli, A. (2000). Limbs and tail as evolutionarily diverging duplicates of the main body axis.  
42 *Evol Dev*, 2(3), 157-165.
- 43 Minelli, A. (2003). *The Development of Animal Form: Ontogeny, Morphology, and Evolution*:  
44 Cambridge University Press.
- 45 Moczek, A. P., & Nagy, L. M. (2005). Diverse developmental mechanisms contribute to  
46 different levels of diversity in horned beetles. *Evol Dev*, 7(3), 175-185. doi:10.1111/j.1525-  
47 142X.2005.05020.x
- 48 Nielsen, C. (2012). *Animal Evolution: Interrelationships of the Living Phyla*: OUP Oxford.
- 49 Panganiban, G., Irvine, S. M., Lowe, C., Roehl, H., Corley, L. S., Sherbon, B., . . . Carroll, S. B.  
50 (1997). The origin and evolution of animal appendages. *Proc Natl Acad Sci U S A*, 94(10),  
51 5162-5166.

- 1 Parr, B. A., & McMahon, A. P. (1995). Dorsalizing signal Wnt-7a required for normal polarity of  
2 D-V and A-P axes of mouse limb. *Nature*, 374(6520), 350-353. doi:10.1038/374350a0
- 3 Prpic, N. M. (2008). Parasegmental appendage allocation in annelids and arthropods and the  
4 homology of parapodia and arthropodia. *Front Zool*, 5, 17. doi:10.1186/1742-9994-5-17
- 5 Pueyo, J. I., & Couso, J. P. (2005). Parallels between the proximal-distal development of  
6 vertebrate and arthropod appendages: homology without an ancestor? *Curr Opin Genet  
7 Dev*, 15(4), 439-446.
- 8 Rice, R.V., Mueller, R., & Adelman, W.J. (1990). Tissue culture of squid neurons, glia, and  
9 muscle cells. In W. J. Adelman, J.M. Arnold, & D.L. Gilbert (Eds.), *Squids as experimental  
10 animals.*: Springer US.
- 11 Riddle, R. D., Johnson, R. L., Laufer, E., & Tabin, C. (1993). Sonic hedgehog mediates the  
12 polarizing activity of the ZPA. *Cell*, 75(7), 1401-1416.
- 13 Ruppert, E.E., Fox, R.S., & Barnes, R.D. (2004). *Invertebrate Zoology: A Functional  
14 Evolutionary Approach*: Thomson-Brooks/Cole.
- 15 Scherz, P. J., McGlinn, E., Nissim, S., & Tabin, C. J. (2007). Extended exposure to Sonic  
16 hedgehog is required for patterning the posterior digits of the vertebrate limb.  
17 *Developmental biology*, 308(2), 343-354.
- 18 Shapiro, M. D., Hanken, J., & Rosenthal, N. (2003). Developmental basis of evolutionary digit  
19 loss in the Australian lizard *Hemiergis*. *J Exp Zool B Mol Dev Evol*, 297(1), 48-56.
- 20 Shigeno, S., Sasaki, T., Moritaki, T., Kasugai, T., Vecchione, M., & Agata, K. (2008). Evolution  
21 of the cephalopod head complex by assembly of multiple molluscan body parts: Evidence  
22 from *Nautilus* embryonic development. *J Morphol*, 269(1), 1-17.
- 23 Shubin, N., Tabin, C., & Carroll, S. (1997). Fossils, genes and the evolution of animal limbs.  
24 *Nature*, 388(6643), 639-648.
- 25 Shubin, N., Tabin, C., & Carroll, S. (2009). Deep homology and the origins of evolutionary  
26 novelty. *Nature*, 457(7231), 818-823. doi:10.1038/nature07891
- 27 Smith, S. A., Wilson, N. G., Goetz, F. E., Feehery, C., Andrade, S. C., Rouse, G. W., . . . Dunn,  
28 C. W. (2011). Resolving the evolutionary relationships of molluscs with phylogenomic tools.  
29 *Nature*, 480(7377), 364-367.
- 30 Tabin, C. J., Carroll, S. B., & Panganiban, G. (1999). Out on a Limb: Parallels in Vertebrate and  
31 Invertebrate Limb Patterning and the Origin of Appendages. *American Zoologist*, 39(3),  
32 650-663.
- 33 Tarazona, O. A., Slota, L. A., Lopez, D. H., Zhang, G., & Cohn, M. J. (2016). The genetic  
34 program for cartilage development has deep homology within Bilateria. *Nature*, 533(7601),  
35 86-89. doi:10.1038/nature17398
- 36 Winchell, C. J., & Jacobs, D. K. (2013). Expression of the Lhx genes *apterous* and *lim1* in an  
37 errant polychaete: implications for bilaterian appendage evolution, neural development, and  
38 muscle diversification. *Evodevo*, 4(1), 4. doi:10.1186/2041-9139-4-4
- 39 Winchell, C. J., Valencia, J. E., & Jacobs, D. K. (2010). Expression of *Distal-less*, *dachshund*,  
40 and *optomotor blind* in *Neanthes arenaceodentata* (Annelida, Nereididae) does not support  
41 homology of appendage-forming mechanisms across the Bilateria. *Dev Genes Evol*, 220(9-  
42 10), 275-295. doi:10.1007/s00427-010-0346-0
- 43 Zhu, J., Nakamura, E., Nguyen, M. T., Bao, X., Akiyama, H., & Mackem, S. (2008). Uncoupling  
44 Sonic hedgehog control of pattern and expansion of the developing limb bud. *Dev Cell*,  
45 14(4), 624-632.
- 46

## Figure 1

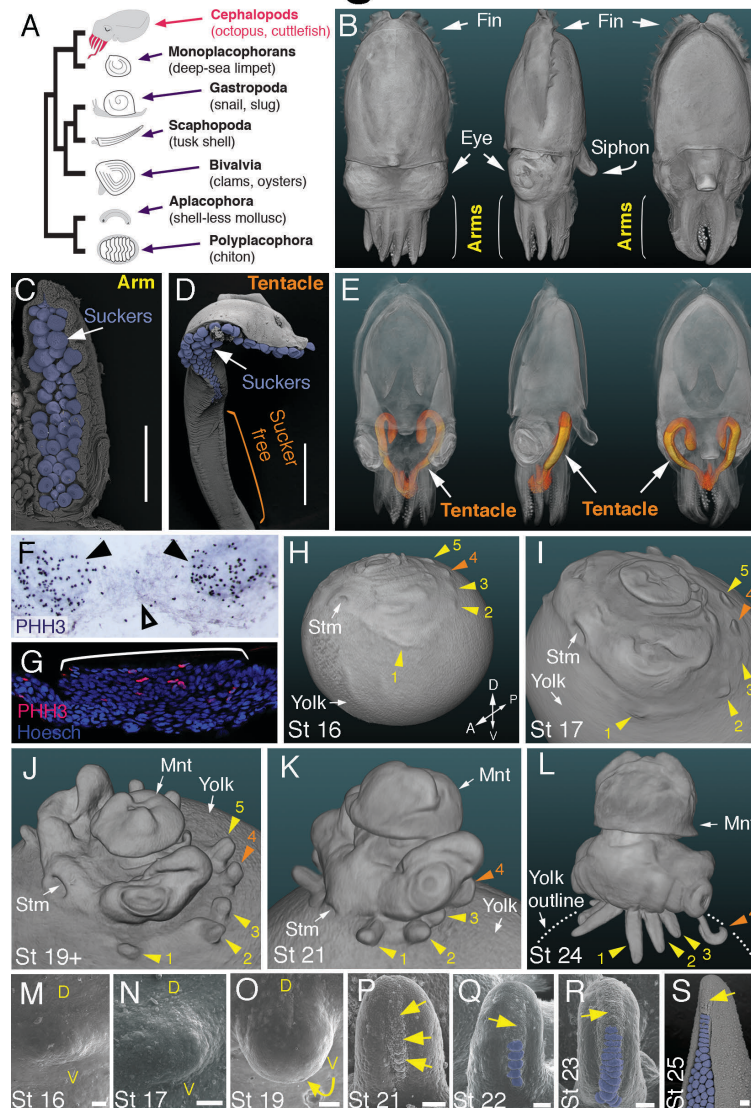

1

2

3

**Figure 1. Development of arms and tentacles in the cuttlefish, *Sepia officinalis*.**

4

(A) Phylogenetic relationships of Mollusca based on phylogenomic data (Smith et al.,

5

2011) illustrating the unique morphology of the cephalopod body plan compared to

6

other mollusks. (B) OPT reconstruction of a cuttlefish hatchling showing positions of

7

the limbs; only arms are visible (see also Supplementary Movie S1). (C to D), SEM of

8

the ventral side of a cuttlefish arm (C) and tentacle (D). Suckers are pseudocolored

9

blue. Note distal restriction of suckers in tentacle relative to arm. (E) OPT

1 reconstruction illustrating the internally retracted tentacles. Specimens are same as in  
2 (B), but here the tentacles are displayed in orange and the rest of the tissue is  
3 rendered translucent (see also Supplementary Movie 2). (F and G) Phospho-histone  
4 H3 (PHH3) immunostaining at stage 15 shows localized clusters of proliferating cells  
5 at the onset of limb development (black arrowheads) but little proliferation in the  
6 interlimb region (open arrowhead). Colorimetric detection with DAB in a whole mount  
7 in (F) and immunofluorescence on limb cryosections (white bracket) in (G). (H and L)  
8 OPT reconstructions of cuttlefish embryos at stages 16 to 24. Cuttlefishes have five  
9 bilaterally symmetric limb pairs (ten limbs; eighth arms and two tentacles). Numbered  
10 arrowheads mark all five limbs/limb buds on the left side of each embryo. The left  
11 tentacle differentiates from position number four (orange arrowhead), whereas arms  
12 form from limb buds at the other positions (yellow arrowheads). See also  
13 Supplementary Movies S3 to S5. A, anterior; P, posterior; D, dorsal; V, ventral; Stm,  
14 stomodeum; Mnt, mantle. (M to O) SEM during early stages of cuttlefish limb  
15 development (stages 16 to 19). Morphogenesis of the limb is first observed as a slight  
16 swelling (M) that transforms into a limb bud (O) as proximodistal outgrowth  
17 progresses. D, dorsal; V, ventral. **p-s**, SEM at later stages of cuttlefish limb  
18 development (stages 21 to 25) showing the formation of sucker buds on the ventral  
19 surface of a developing limb. A primordial sucker band (yellow arrows) is observed  
20 along the ventral midline of a stage 21 limb bud (P). At later stages, the band cleaves  
21 superficially from the proximal end to form the sucker buds (pseudocolored blue in Q  
22 to S). Scale bars: 0.5 mm (C and D) and 100  $\mu$ m (M to S).

23

**Figure 2**

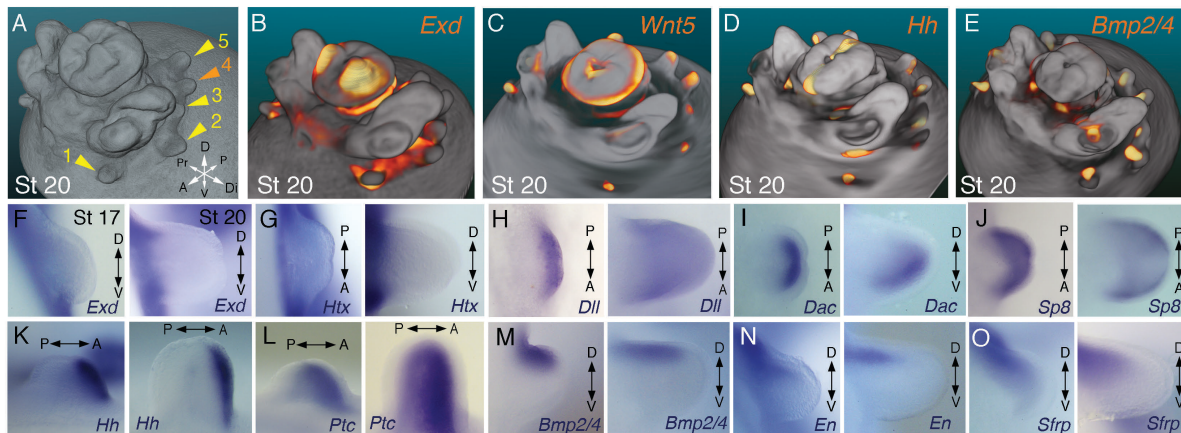

1  
2  
3  
4 **Figure 2. Molecular regionalization of proximodistal, anteroposterior, and**  
5 **dorsoventral axes during cephalopod limb development. (A)** OPT reconstruction of  
6 cuttlefish embryo at stage 20 showing all five limb buds on the left side of the embryo  
7 (arms, yellow arrowheads; tentacle, orange arrowhead). **(B to E)** OPT reconstructions  
8 showing four representative genes with polarized expression patterns along major  
9 axes of limb buds (gene expression indicated by orange/yellow). Proximodistally  
10 polarized expression of *Exd* (B) and *Wnt5* (C). Anteroposteriorly polarized expression  
11 of *Hh* (D), dorsoventrally polarized expression of *Bmp2/4* (E). **(F to O)**, *In situ*  
12 hybridizations of cuttlefish limb buds at stage 17 (left) and stage 20 (right) showing  
13 polarized patterns of expression along the proximodistal axis for *Exd* (F), *Htx* (G), *Dll*  
14 (H), *Dac* (I) and *Sp8* (J); the anteroposterior axis for *Hh* (K) and *Ptc* (L); and the  
15 dorsoventral axis for *Bmp2/4* (M), *En* (N) and *Sfrp* (O). A, anterior; P, posterior; D,  
16 dorsal; V, ventral; Di, distal; Pr, proximal.

17

## Figure 3

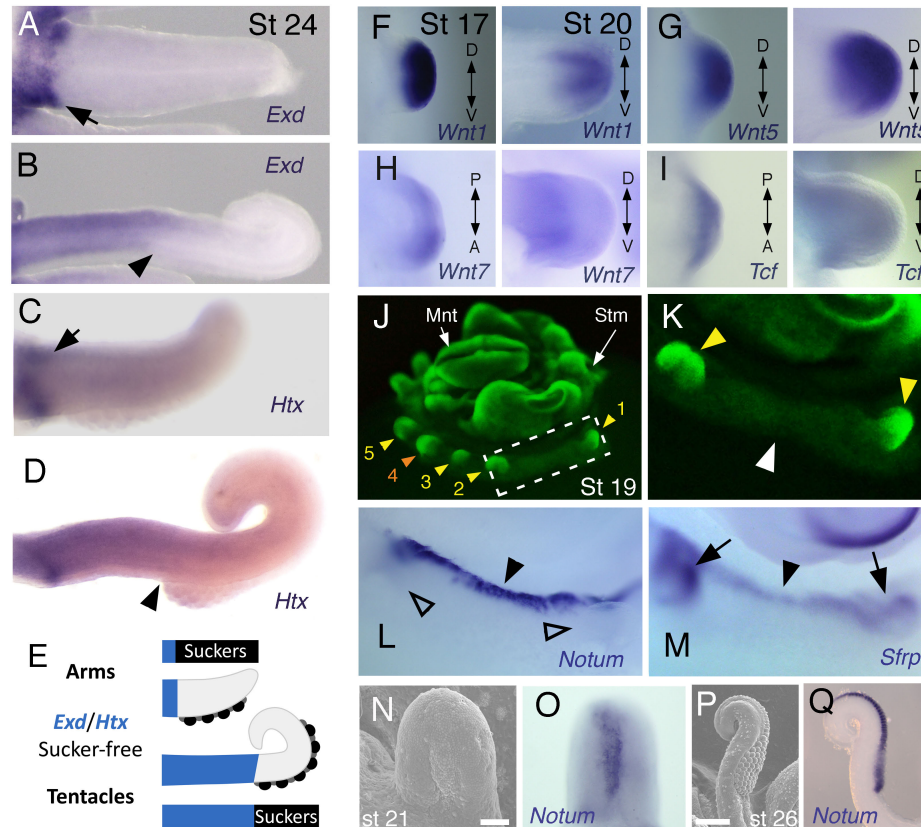

1  
2  
3 **Figure 3. Expression of proximal identity genes *Exd* and *Htx* in arms and**  
4 **tentacles corresponds with distribution of suckers; Wnt signaling repressors**  
5 **are distally restricted. (A and B) Compared to arms (A), tentacles (B) show a**  
6 **distally expanded domain of *Exd* expression in the proximal region of the limb. (C and**  
7 **D) A similar pattern of expression is detected for *Htx* during arm (C) and tentacle (D)**  
8 **development. Distal boundary of *Exd* and *Htx* expression marked by black arrowheads**  
9 **in (A to D). (E) Expanded expression of proximal identity genes correlates with the**  
10 **expanded sucker-free domain seen in tentacles compared to arms. (F and H) The Wnt**  
11 **ligands *Wnt1*, *Wnt5* and *Wnt7* show a distally restricted expression but no**

1 dorsoventral polarization at stages 17 and 20. **(I)** The Wnt signaling transcription factor  
2 *Tcf* is also distally restricted but shows no dorsoventral polarization at stages 17 and  
3 20. **(J and K)** Fluorescent nuclear stain SYBR Safe highlights limb buds (yellow  
4 arrowheads). Boxed region in (J) is enlarged in (K); white arrowhead marks interlimb  
5 region. **(L and M)** The Wnt ligand repressors *Notum* and *Sfrp* are expressed in the  
6 dorsal interlimb region (black arrowhead in L and M; compare with K). *Sfrp* expression  
7 expands into the dorsal limb bud (black arrows in M) in stage 19 embryos, whereas  
8 *Notum* stays dorsal but proximally restricted (open arrowheads mark the limb buds in  
9 L). **(N and O)** the earliest sign of sucker formation can be detected by SEM as a slight  
10 swelling (N) and by *Notum* expression (O) on the ventral side of stage 21 limb buds.  
11 **(P and Q)** expression of *Notum* is maintained through later stages of sucker  
12 morphogenesis, as seen in stage 26 tentacles (lateral views).  
13



## Figure 4

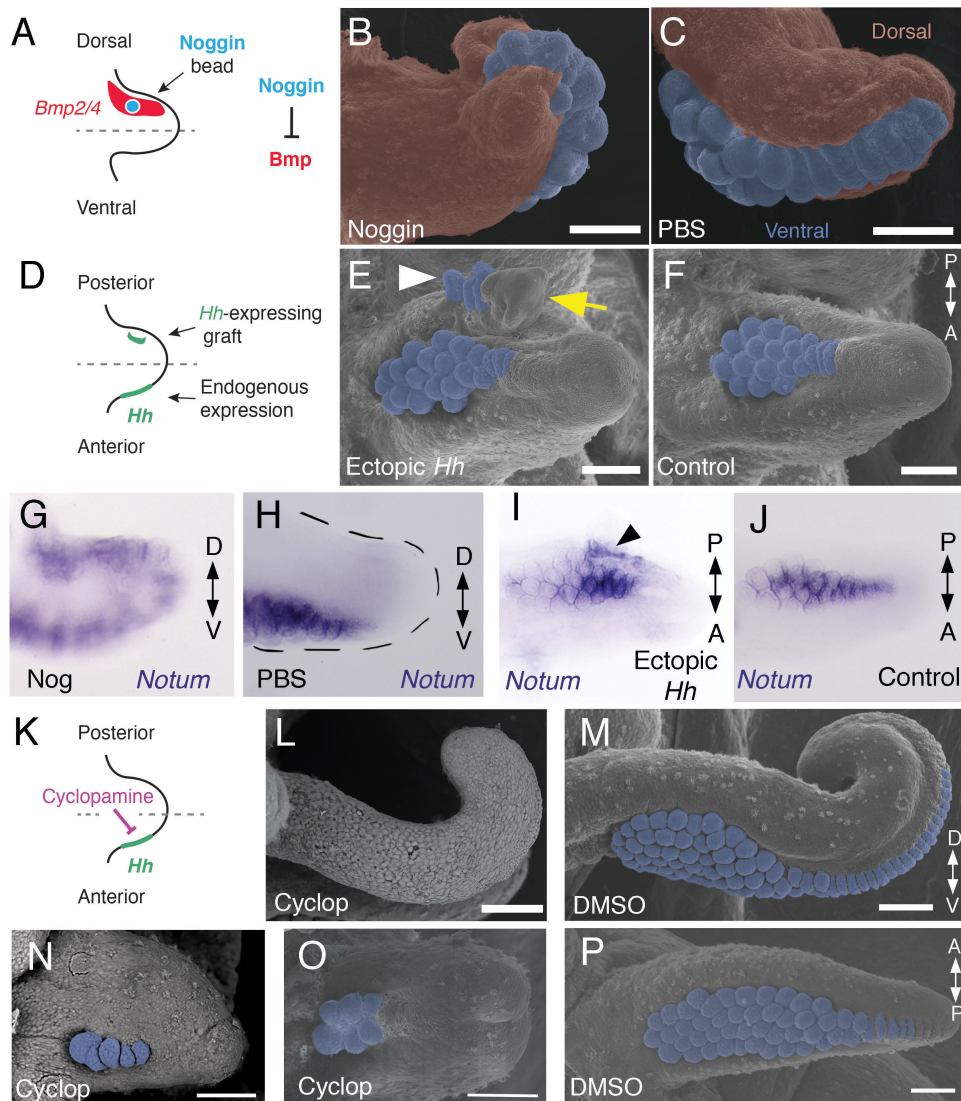

1

2

3 **Figure 4. Functional evidence that Bmp signaling controls dorsoventral**

4 **patterning and Hh signaling regulates anteroposterior patterning in cephalopod**

5 **limbs. (A to C) Implantation of protein carrier beads with the Bmp inhibitor Nogging**

6 **(A) results in ectopic formation of sucker buds (n=8/12) on the dorsal surface of the**

7 **limb (B) indicating a failure in proper specification of dorsal identity due to Bmp**

1 repression, whereas PBS control beads (n=15/15) show normal differentiation of  
2 ventral (pseudocolored red) and dorsal (pseudocolored blue) identities (C). (D to F),  
3 Posterior graft of *Hh*-expressing tissue, from the funnel of a stage 24 donor embryo,  
4 placed into the posterior margin of the limb in a stage 17 host embryo (D) generates a  
5 posterior mirror-image limb duplication (n=7/12), yellow arrow in (E), whereas no  
6 duplication (n=8/8) is caused by controls grafts (F). Sucker buds pseudocolored blue  
7 in (E and F); sucker buds in duplicated limb marked with a white arrowhead. (G and H)  
8 ectopic *Notum* expression on the dorsal limb after Noggin bead implantations (G),  
9 control limbs with PBS beads show normal expression of *Notum* only ventrally (H). (I  
10 and J) posterior mirror-image duplicated limb, caused by grafting *Hh*-expressing  
11 tissue, develop sucker buds that express *Notum* in (I) marked by black arrowhead,  
12 thus two separate *Notum* expression domains can be detected compared to a single  
13 *Notum* expression domain detected in limbs that were grafted with non-*Hh*-expressing  
14 control tissue in (J). (K to P) transitory Hh pathway repression by the small molecule  
15 Hh antagonist cyclopamine (K) during early stages of limb development affects the  
16 formation of the normal set of sucker buds rows along the anteroposterior axis,  
17 causing the complete loss of suckers in tentacles (L) or a substantial reduction of  
18 sucker bud number in arms (N and O), while control embryos exposed to DMSO form  
19 the usual number of sucker bud rows in the tentacles (M) and arms (P). Sucker buds  
20 pseudocolored blue in (B, E, F, M to P). Scale bars 100  $\mu$ m.

21

1        **Supplementary Materials**

2

3        Figures S1 to S3

4        Captions for Movies S1 to S5

5

6        **Other Supplementary Materials for this manuscript include the following:**

7

8        Movies S1 to S5

9

## Figure S1

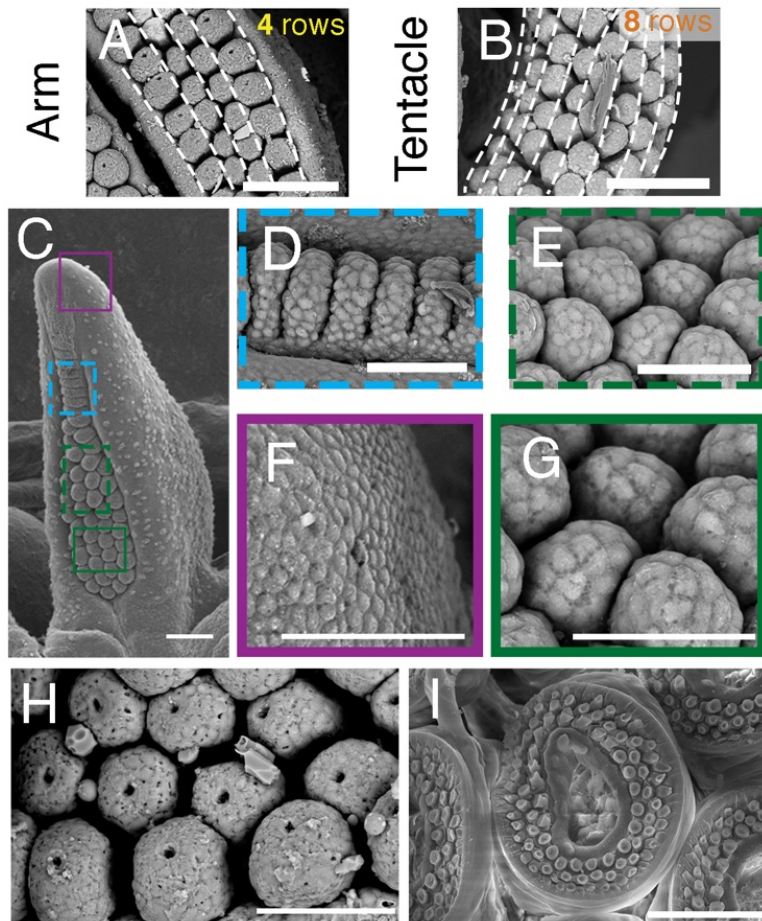

1  
2  
3 **Figure S1. Sucker morphogenesis.** All panels show scanning electron micrographs;  
4 scale bars, 100  $\mu\text{m}$ . (**A** and **B**) Sucker buds are arranged in parallel rows along the  
5 anteroposterior axis, with four rows in arms (**A**) and eight rows in tentacles (**B**). (**C** to  
6 **G**) Sucker formation progresses from distal to proximal. Colored squares in **c** are  
7 shown at higher magnification in **d-g**. Superficial cleavage of the proximal side of the  
8 primordial sucker band in (**D**) and segregation of the recently formed sucker buds in  
9 (**E**). Early sucker bud cells (**G**) form a dome-shaped outline compared to the rather  
10 flattened morphology of the non-sucker forming surface epithelium (**F**). (**H** and **I**)  
11 Higher magnification of sucker buds in a cuttlefish hatchling showing that sucker  
12 differentiation is not yet complete in hatchlings (**H**) compared to the differentiated  
13 suckers found in more mature individuals (**I**), which indicates that a substantial portion  
14 of sucker development occurs during post hatchling development.

## Figure S2

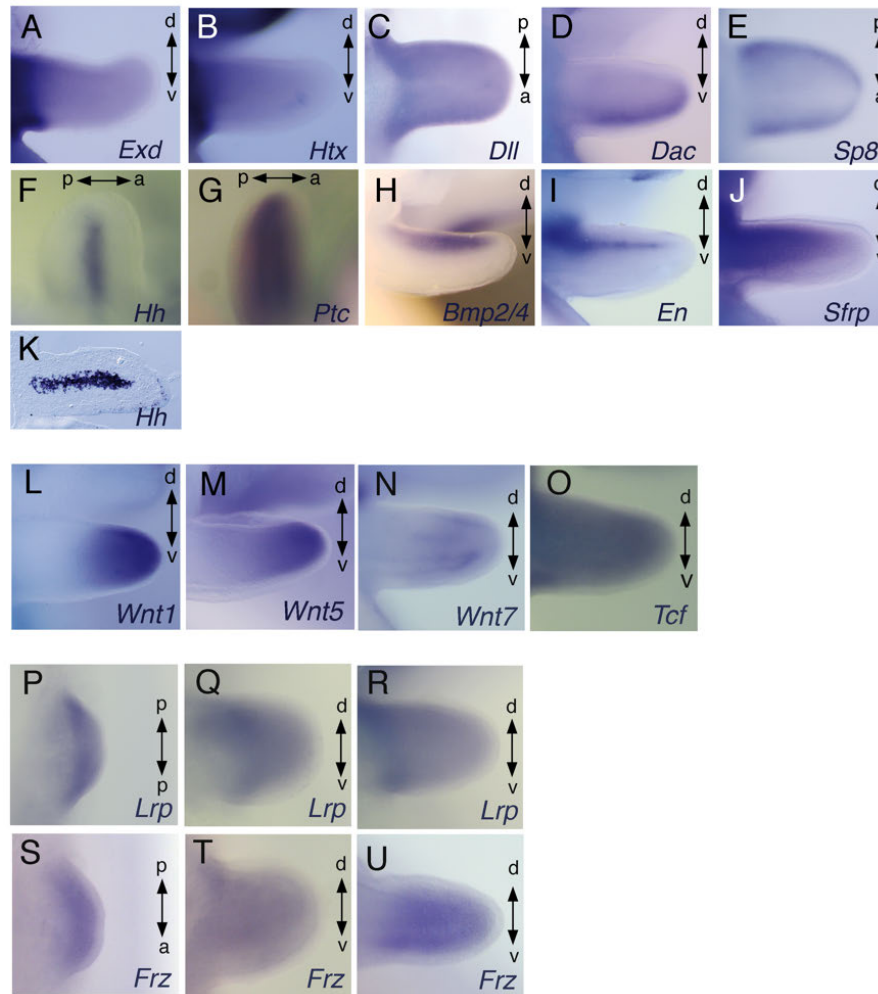

### Figure S2. Expression of developmental control genes in cuttlefish limb buds.

(A to O) *In situ* hybridizations showing *Wnt1*, *Wnt5*, *Wnt7*, *Tcf*, *Exd*, *Htx*, *Dll*, *Dac*, *Sp8*, *Hh*, *Ptc*, *Bmp2/4*, *En* and *Sfrp* in stage 21 embryos. *Hh* expression in stage 21 limb buds, detected by *in situ* hybridizations in whole mount (F) and cryosections (K) showing the central expression in the brachial nerve cell precursors. (P to U) *In situ* hybridizations of *Lrp* and *Frz* at stages 17 (P and S), 20 (Q and T) and 21 (R and U). A, anterior; P, posterior; D, dorsal; V, ventral.

1  
2  
3  
4  
5  
6  
7  
8  
9  
10

## Figure S3

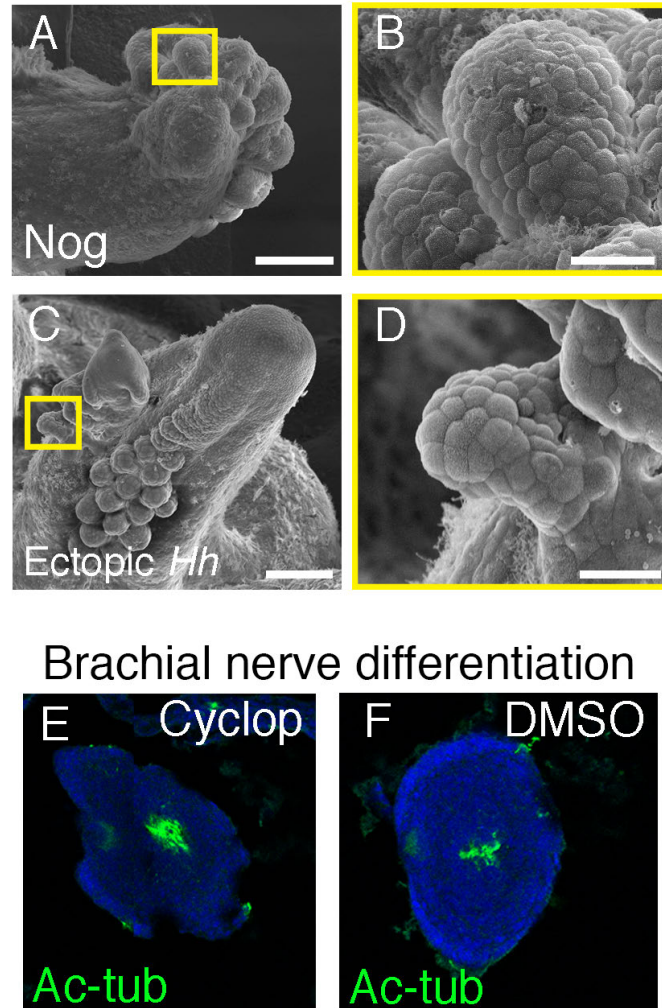

### Brachial nerve differentiation

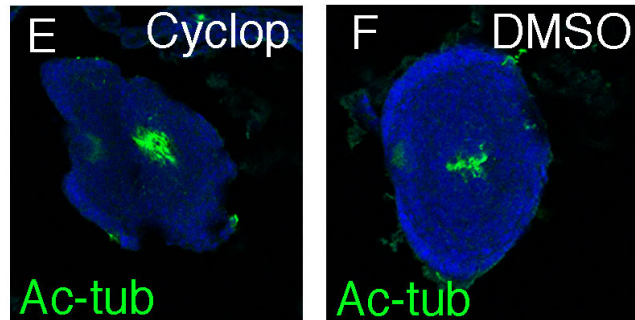

1  
2  
3  
4 **Figure S3. Sucker development after manipulations of Bmp and Hh signaling**  
5 **pathways. (a)** SEM of Noggin-treated limbs shows dorsal ectopic sucker buds (A) as  
6 as seen in Fig. 4b. **(b)** Higher magnification of the region inside the yellow square in (A)  
7 showing the superficial dome-shape morphology of sucker bud cells. **(c)** SEM of  
8 posterior mirror-image duplicated limb caused by graft of *Hh*-expressing tissue, as  
9 as seen in (Fig. 4e). **(d)** Higher magnification of the region inside the yellow square in (C)  
10 shows the superficial dome-shape morphology of sucker bud cells. **(E and F)**  
11 Differentiation of brachial nerves in cyclopamine-treated (E) and DMSO control (F)  
12 embryos revealed by acetylated tubulin in the center of the limbs. Scale bars, 100  $\mu$ m.  
13

1        **SUPPLEMENTARY MOVIES**

2  
3  
4  
5  
6  
7  
8  
9  
10  
11  
12  
13  
14  
15  
16  
17  
18  
19  
20

**Movie S1.** OPT 3D reconstruction showing cuttlefish hatchling morphology

**Movie S2.** OPT 3D reconstruction showing the internal location of the tentacles in a cuttlefish hatchling. Tentacles in orange, other parts of the body in gray (partially translucent).

**Movie S3.** OPT 3D reconstruction showing morphology of a cuttlefish embryo at stage 17. Embryo is positioned on top of the yolk. The early limb buds (8 arm buds and 2 tentacle buds) can be seen around the margin of the embryo.

**Movie S4.** OPT 3D reconstruction showing morphology of a cuttlefish embryo at late stage 19.

**Movie S5.** OPT 3D reconstruction showing the morphology of a cuttlefish embryo at stage 24.
